# Supplementary material for: Novel Bis- and Mono-Pyrrolo[2,3-d]pyrimidine and Purine Derivatives: Synthesis, Computational Analysis and Antiproliferative Evaluation
Source: MDPI journal article supplement (doi:10.3390/molecules26113334), 2021-06-01
Supplement: s1 [file s1]

## Supporting Information for:

### Novel 6-substituted bis- and mono-pyrrolo[2,3-*d*]pyrimidine and purine derivatives: synthesis, computational analysis and antiproliferative evaluation

**Andrea Bistrović Popov<sup>1,2</sup>, Robert Vianello<sup>3</sup>, Petra Grbčić<sup>4</sup>, Mirela Sedić<sup>4</sup>,  
Sandra Kraljević Pavelić<sup>5</sup>, Krešimir Pavelić<sup>6</sup>, Silvana Raić-Malić<sup>1,\*</sup>**

- <sup>1</sup> Department of Organic Chemistry, Faculty of Chemical Engineering and Technology, University of Zagreb, Marulićev trg 20, HR-10000 Zagreb, Croatia, e-mail: sraic@fkit.hr (SRM)
- <sup>2</sup> Department of Chemical Engineering and Biotechnology, University of Cambridge, Philippa Fawcett Drive, CB30AS, Cambridge, UK, e-mail: ab2602@cam.ac.uk (ABP)
- <sup>3</sup> Division of Organic Chemistry and Biochemistry, Ruđer Bošković Institute, Bijenička 54, HR-10000 Zagreb, Croatia, e-mail: robert.vianello@irb.hr (RV)
- <sup>4</sup> Department of Biotechnology, University of Rijeka, Ulica Radmile Matejčić 2, HR-51000 Rijeka, Croatia, e-mail: petra.grbcic@biotech.uniri.hr (PG), msedic@biotech.uniri.hr (MS)
- <sup>5</sup> University of Rijeka, Faculty of Health Studies, Ulica Viktora Cara Emina 5, 51000 Rijeka, Croatia, sandrakp@uniri.hr (SKP)
- <sup>6</sup> Faculty of Medicine, Juraj Dobrila University of Pula, HR-52100, Pula, Croatia, e-mail: pavelic@unipu.hr (KP)

| Content                                                              | Pages   |
|----------------------------------------------------------------------|---------|
| 1. <sup>1</sup> H and <sup>13</sup> C NMR spectra of novel compounds | S2–S40  |
| 2. Computational analysis                                            | S41–S47 |

## 1. $^1\text{H}$ and $^{13}\text{C}$ NMR spectra of novel compounds

**Fig. S1** a)  $^1\text{H}$  NMR and b)  $^{13}\text{C}$  NMR of compd. **2b**

a)

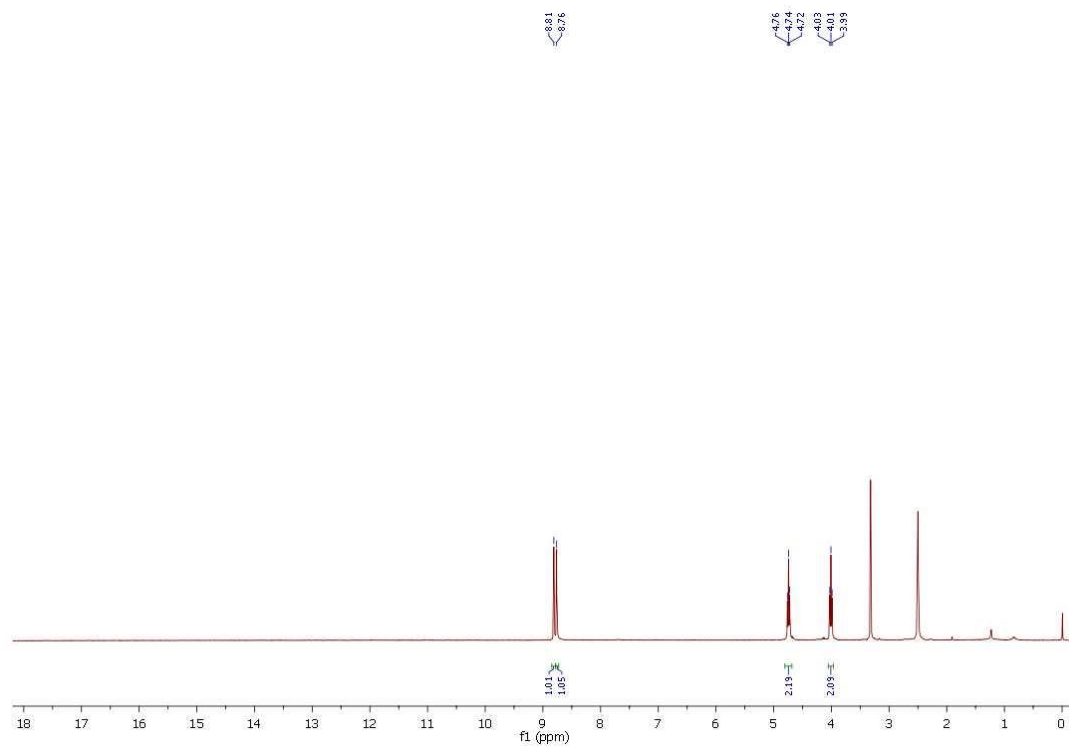

b)

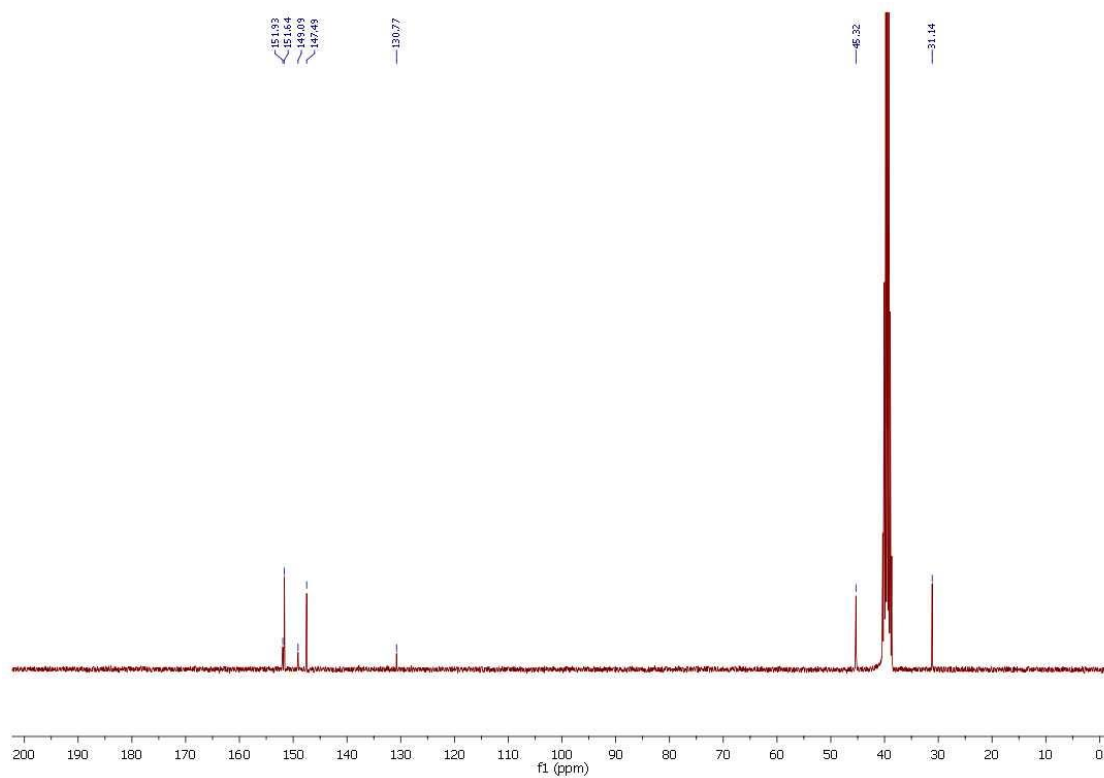

**Fig. S2** a)  $^1\text{H}$  NMR and b)  $^{13}\text{C}$  NMR of compd. **2c**

a)

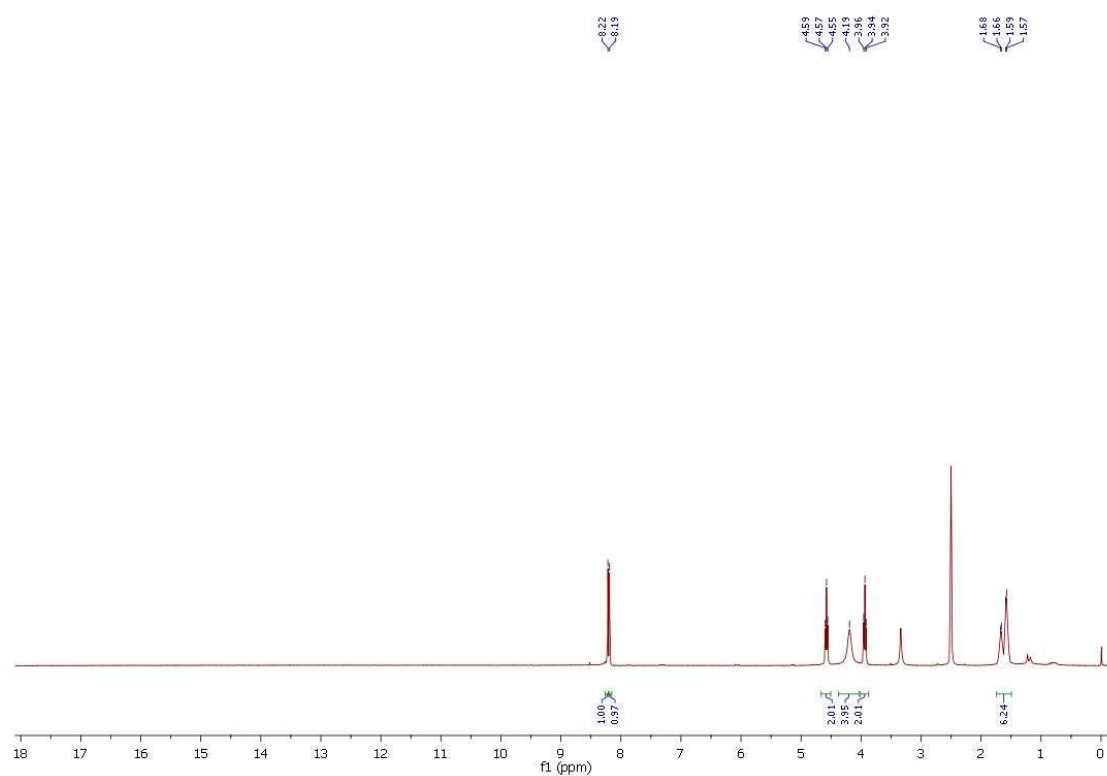

b)

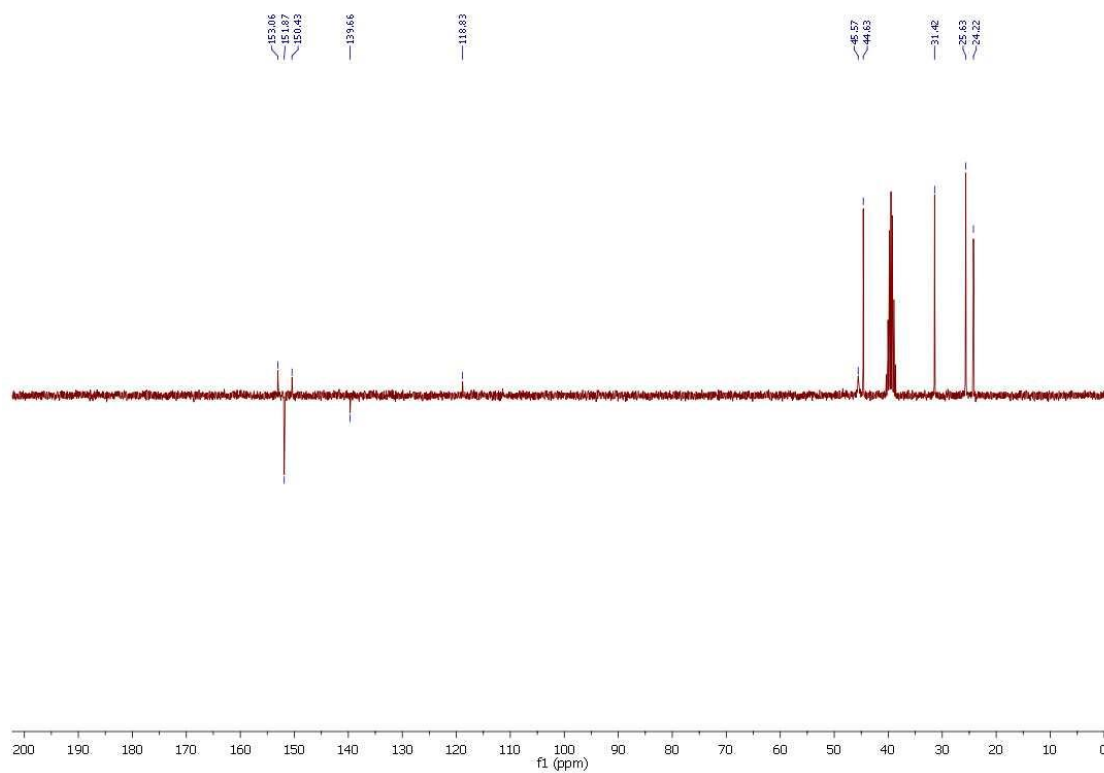

**Fig. S3** a)  $^1\text{H}$  NMR and b)  $^{13}\text{C}$  NMR of compd. **2d**

a)

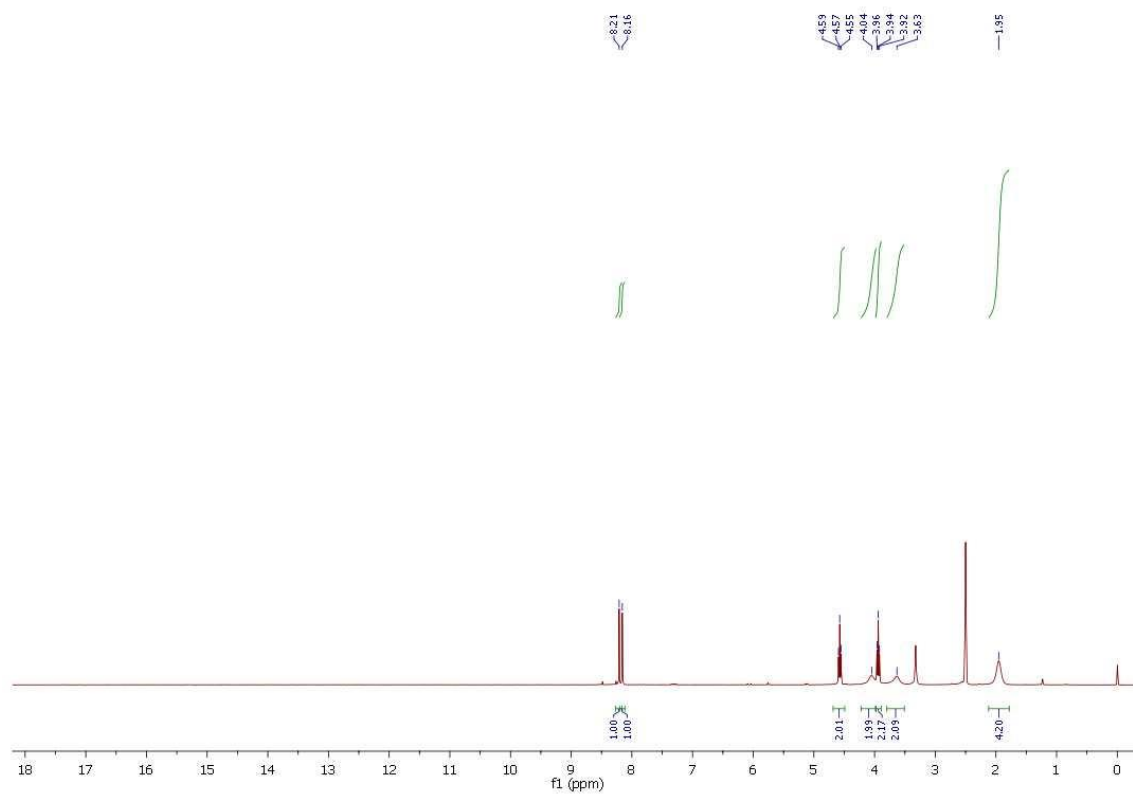

b)

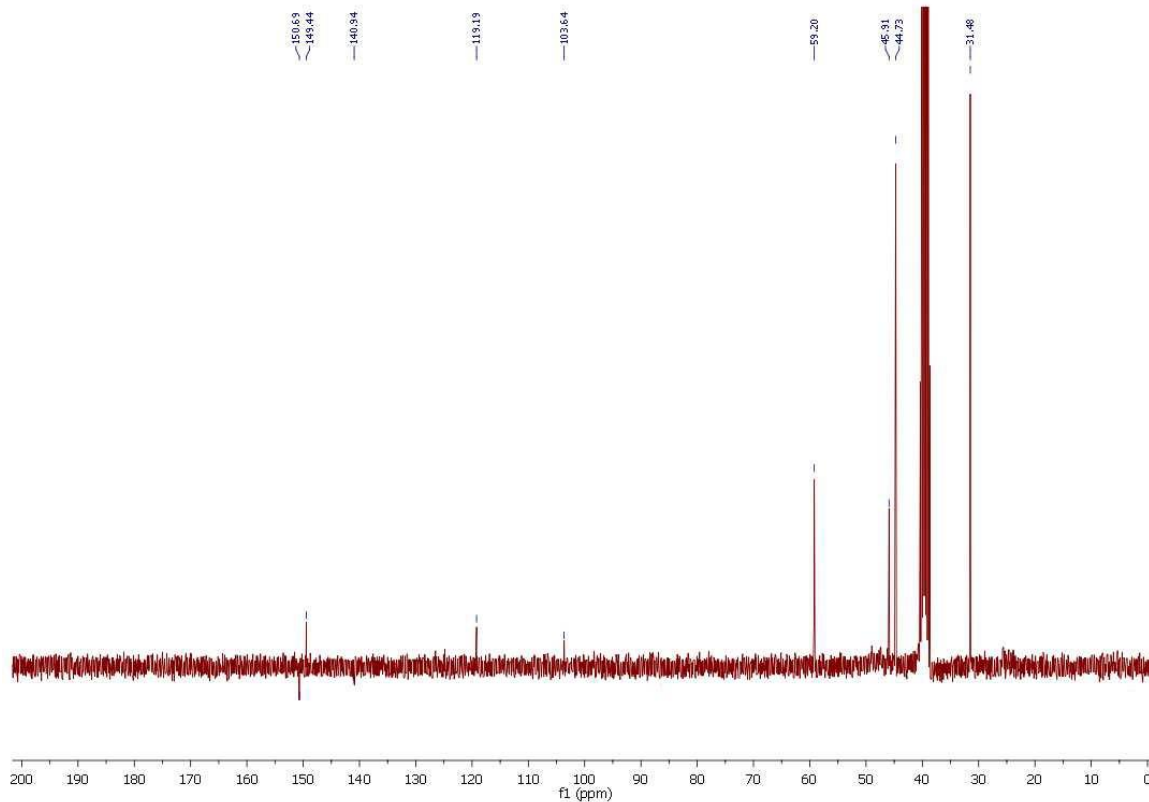

**Fig. S4** a)  $^1\text{H}$  NMR and b)  $^{13}\text{C}$  NMR of compd. **3b**

a)

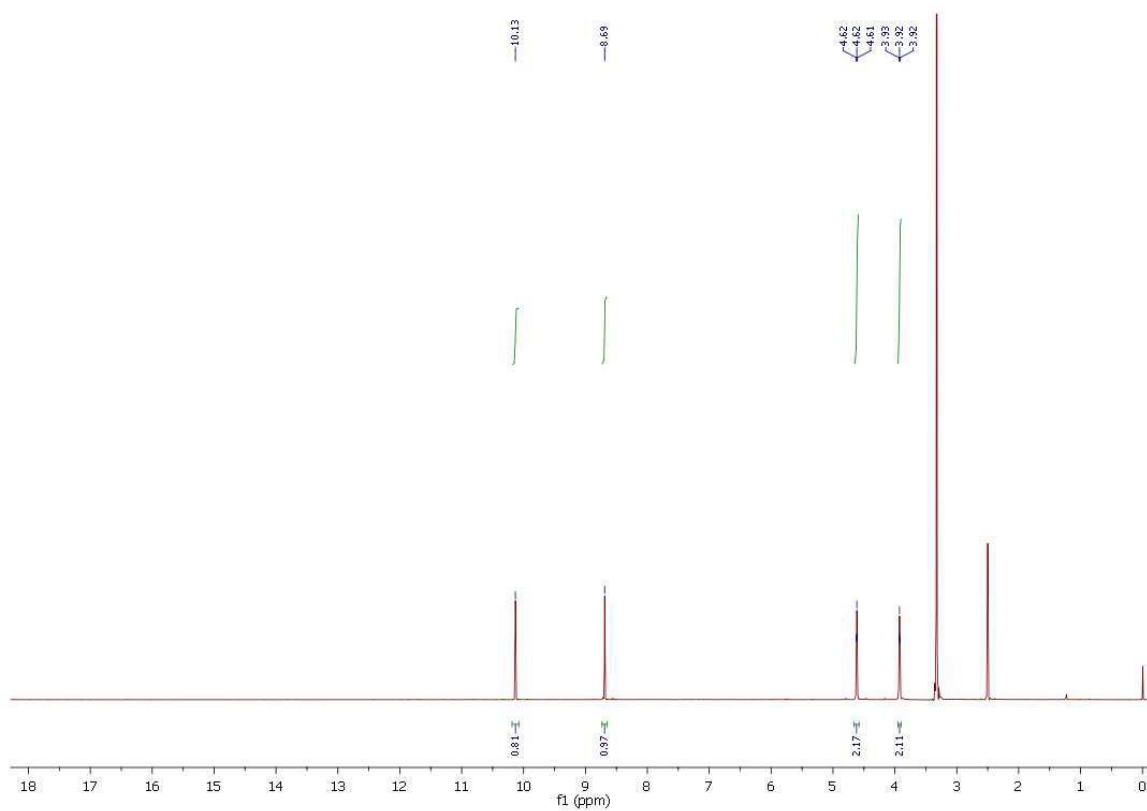

b)

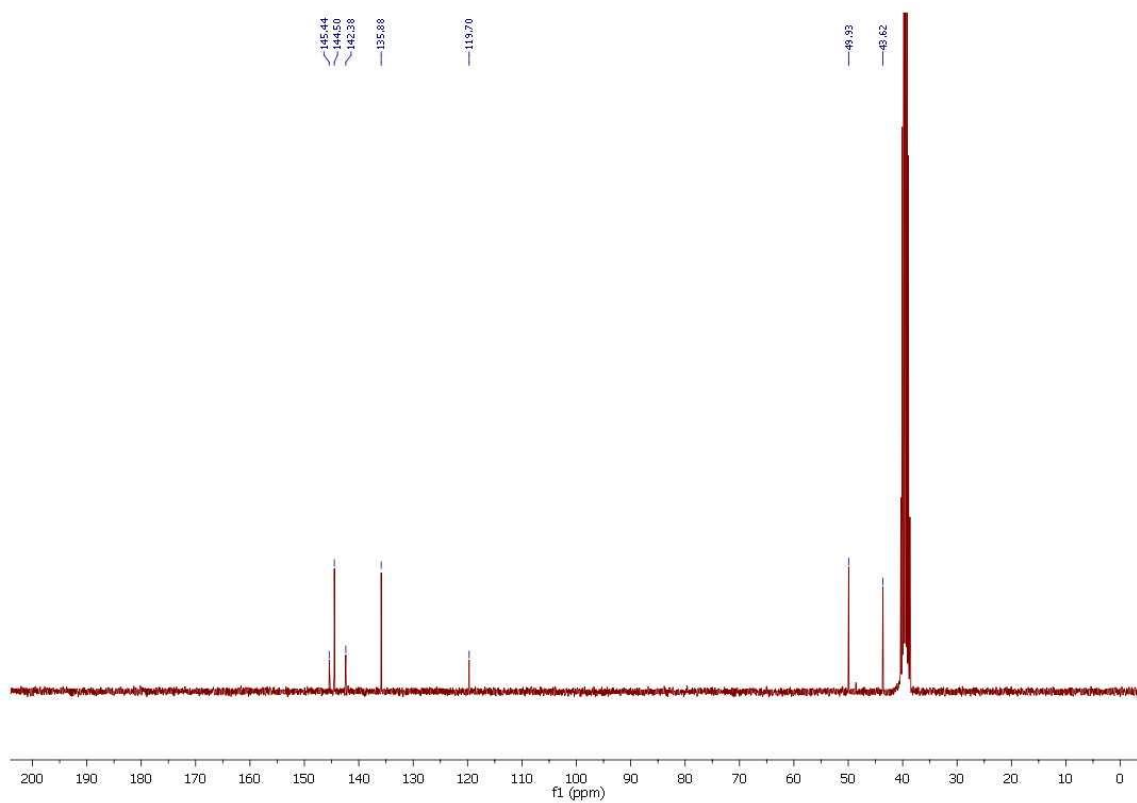

**Fig. S5** a)  $^1\text{H}$  NMR and b)  $^{13}\text{C}$  NMR of compd. **3c**

a)

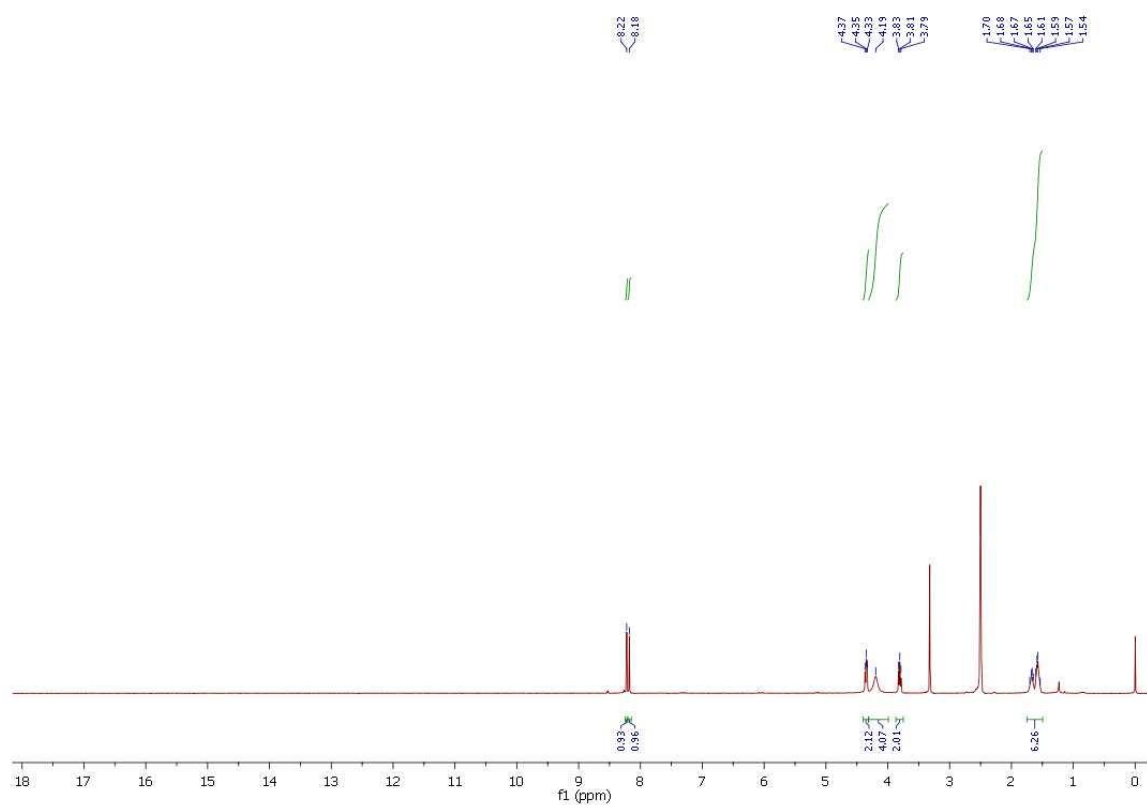

b)

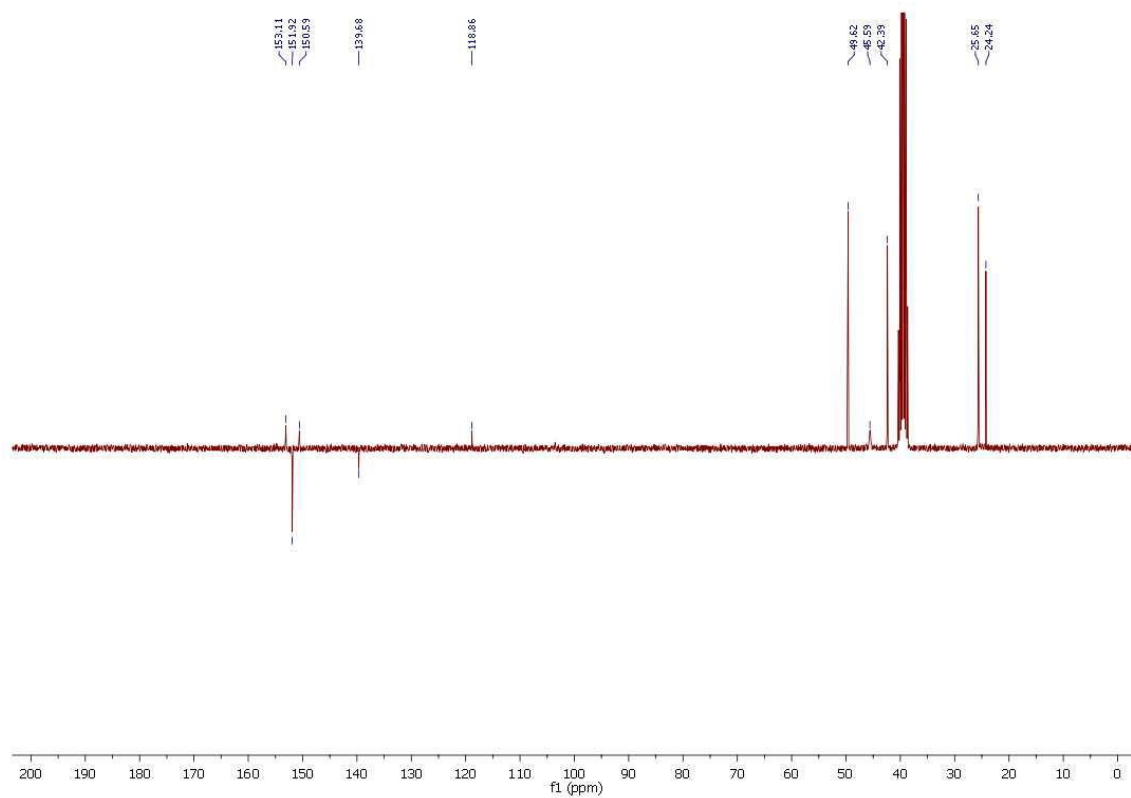

**Fig. S6** a)  $^1\text{H}$  NMR and b)  $^{13}\text{C}$  NMR of compd. **3d**

a)

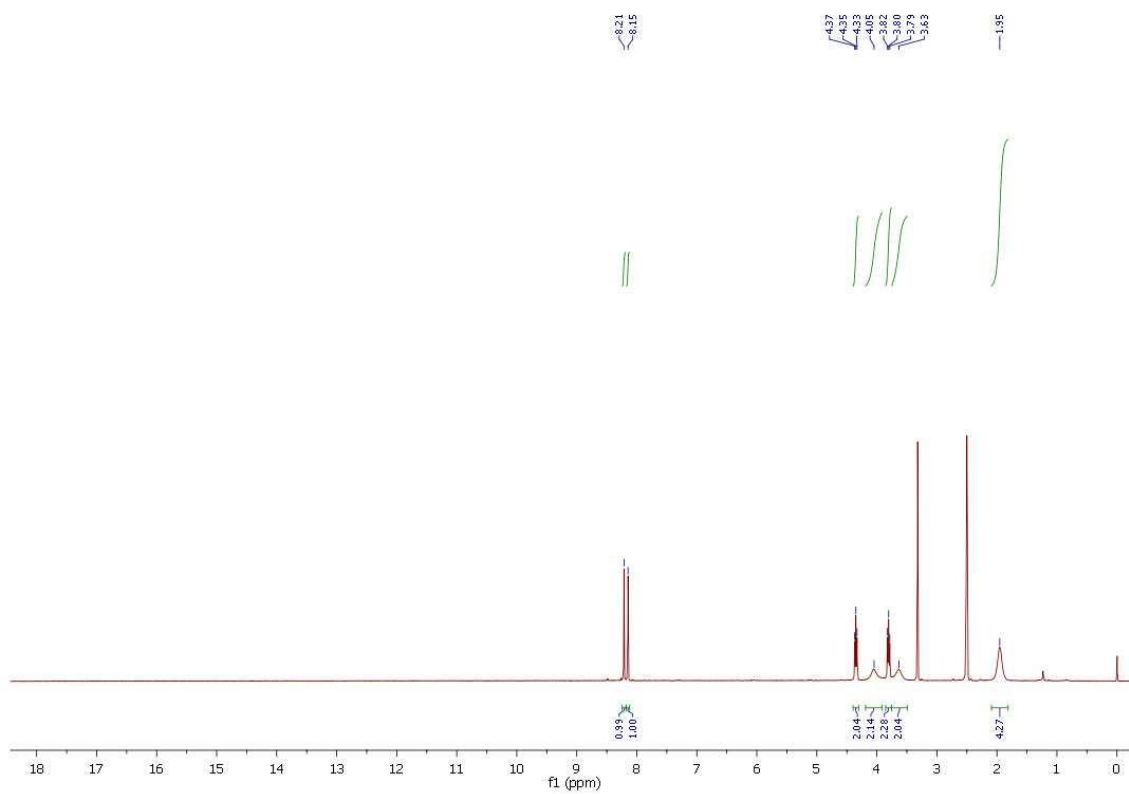

b)

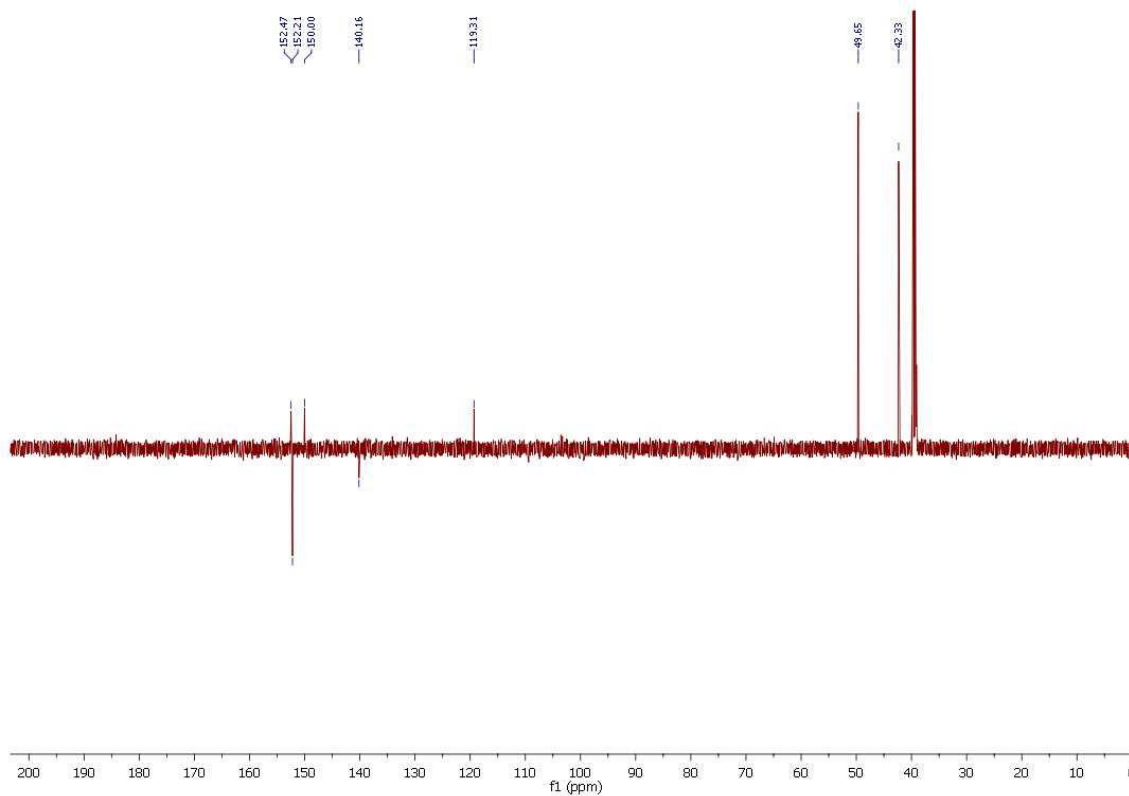

**Fig. S7** a)  $^1\text{H}$  NMR and b)  $^{13}\text{C}$  NMR of compd. **3f**

a)

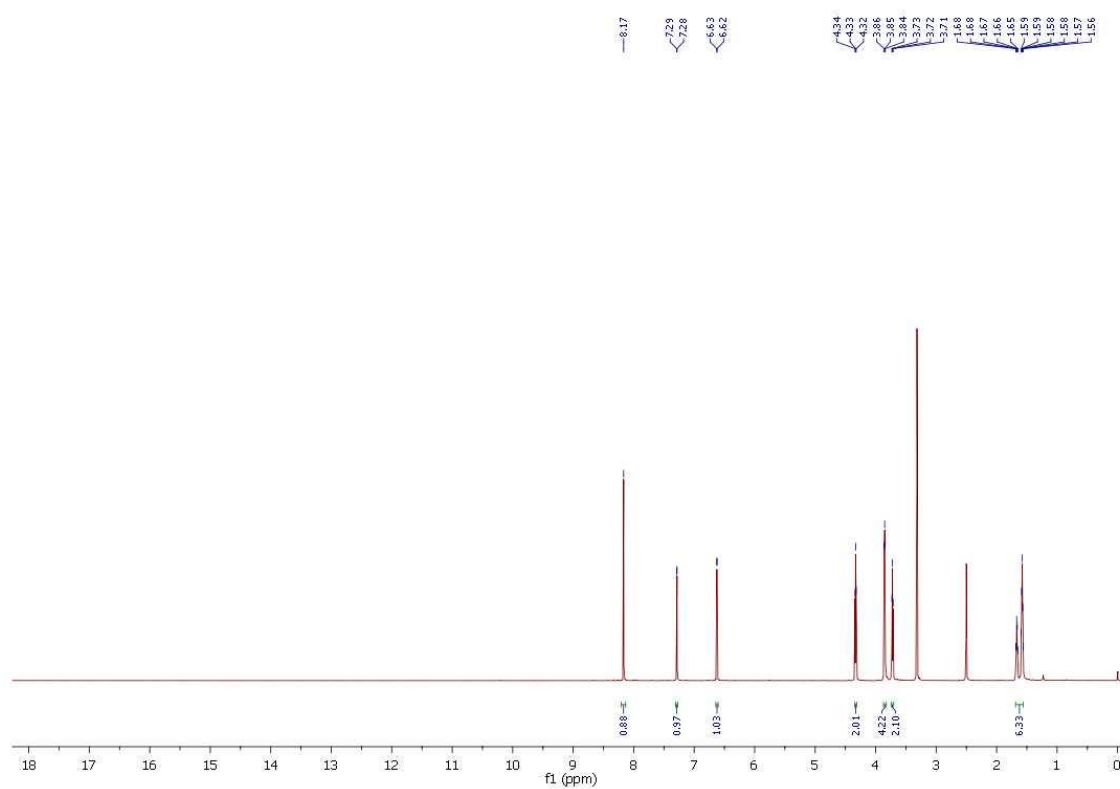

b)

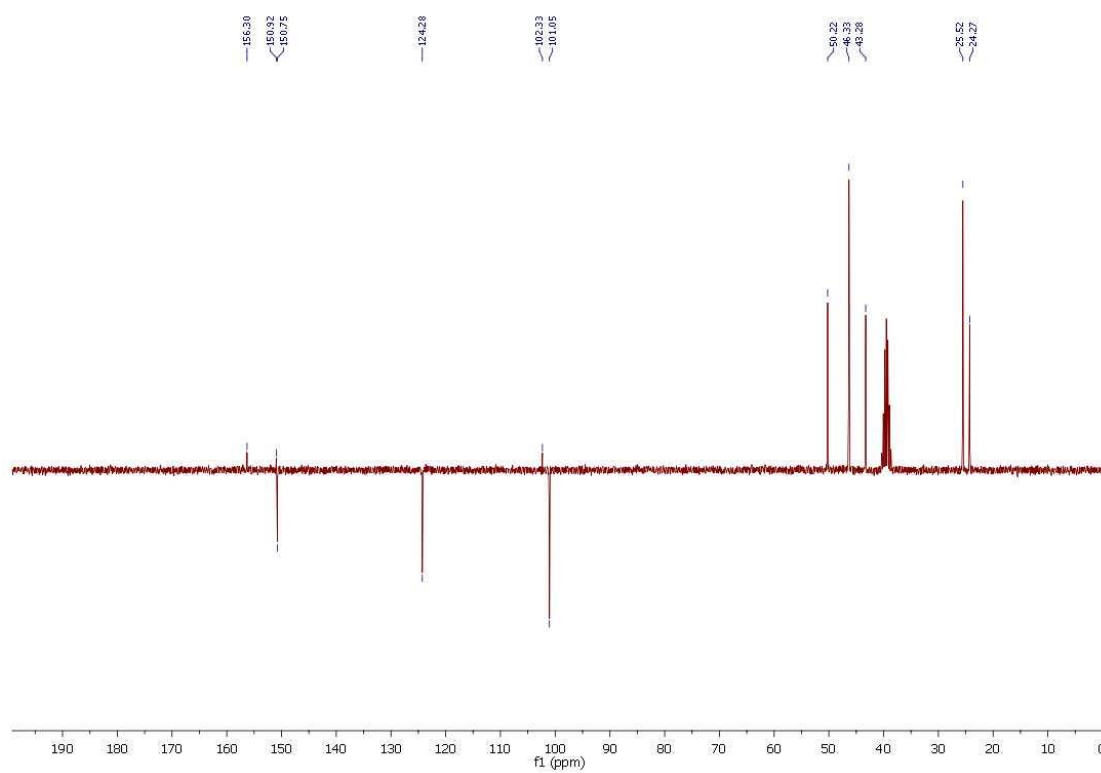



**Fig. S8** a)  $^1\text{H}$  NMR and b)  $^{13}\text{C}$  NMR of compd. **5a**

a)

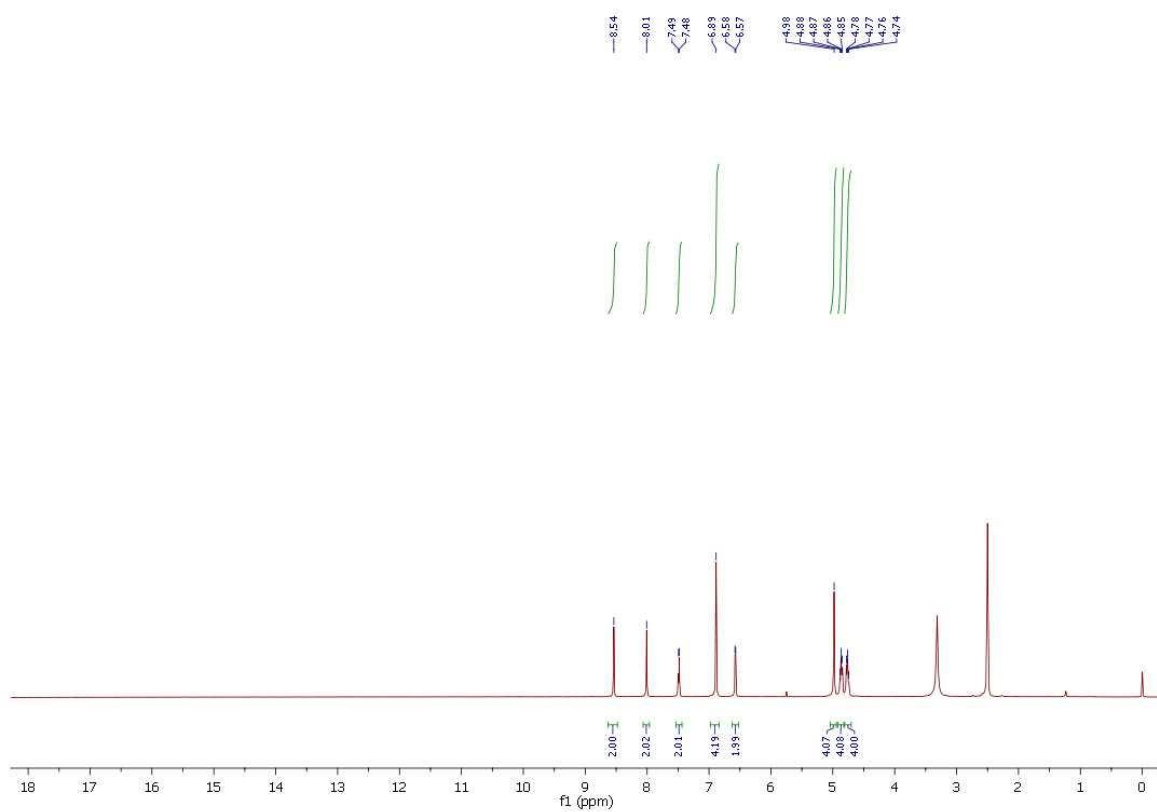

b)

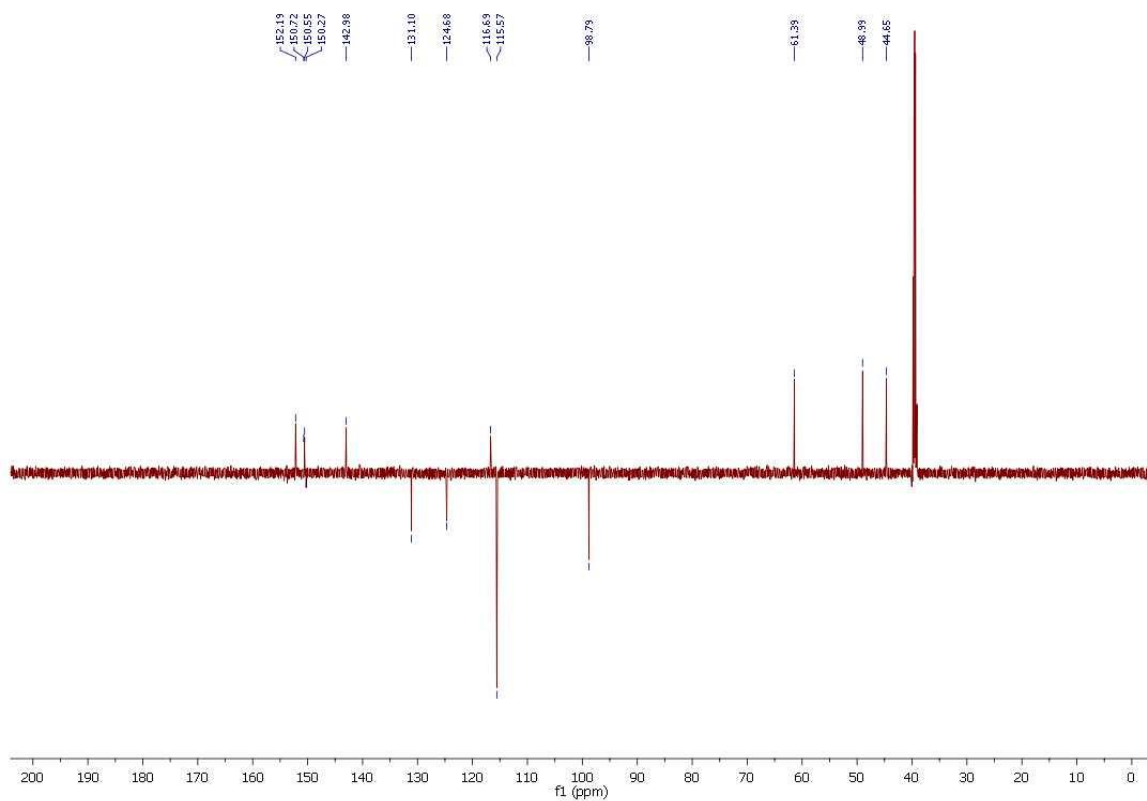

**Fig. S9** a)  $^1\text{H}$  NMR and b)  $^{13}\text{C}$  NMR of compd. **5b**

a)

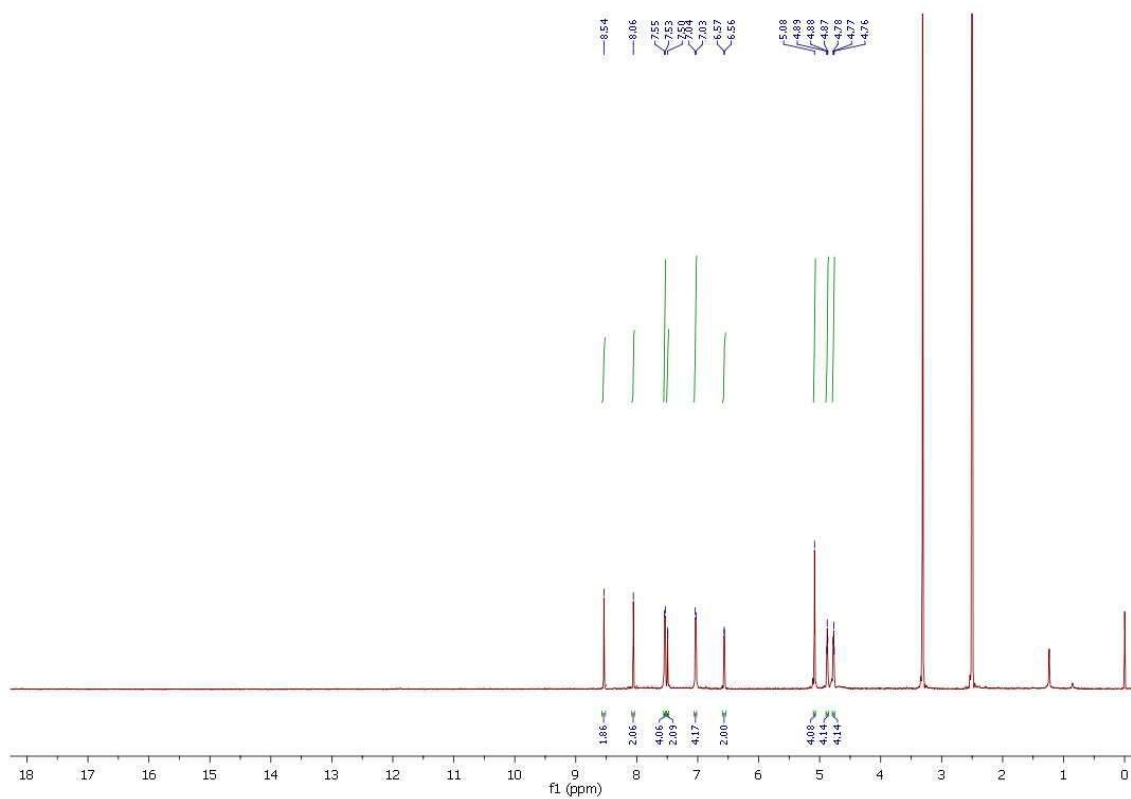

b)

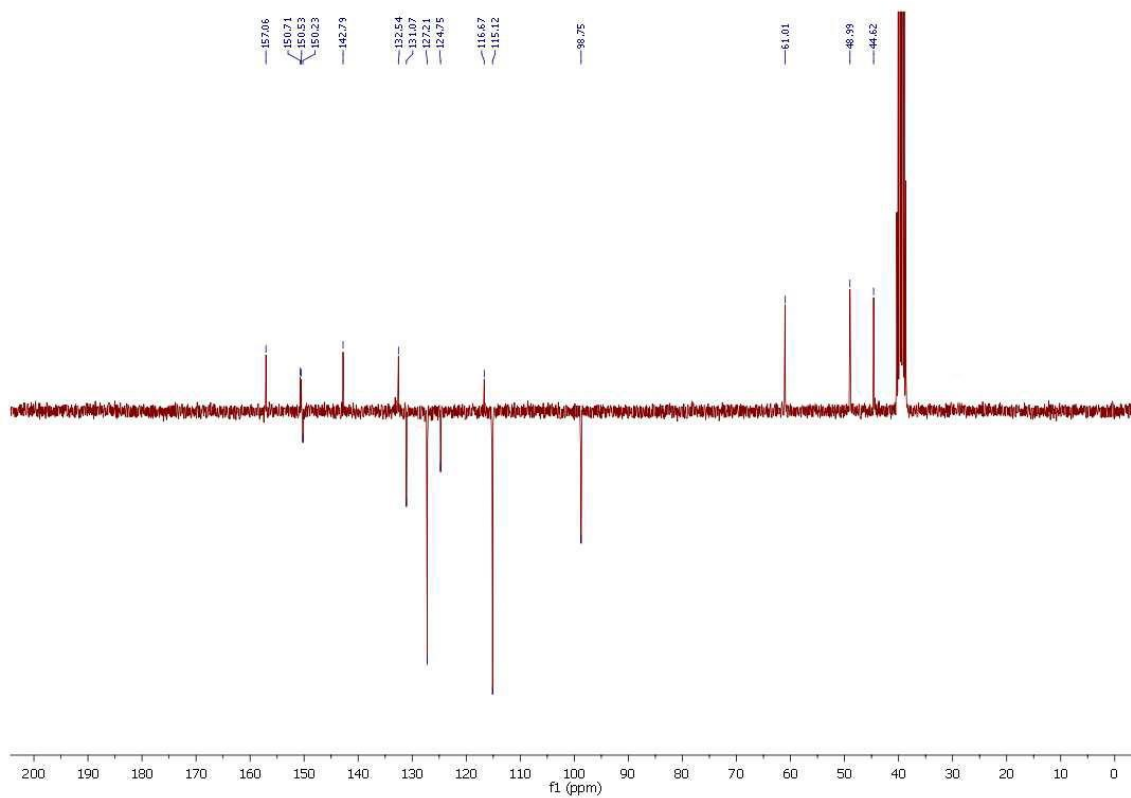

**Fig. S10** a)  $^1\text{H}$  NMR and b)  $^{13}\text{C}$  NMR of compd. **5c**

a)

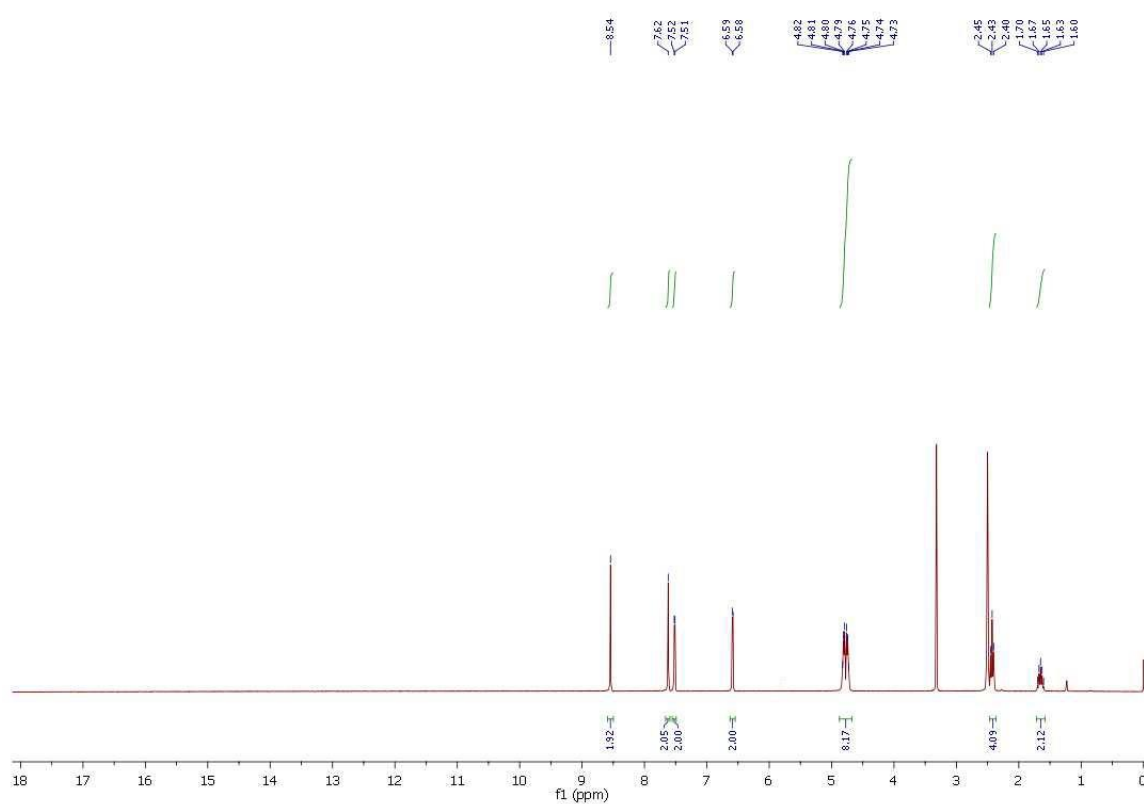

b)

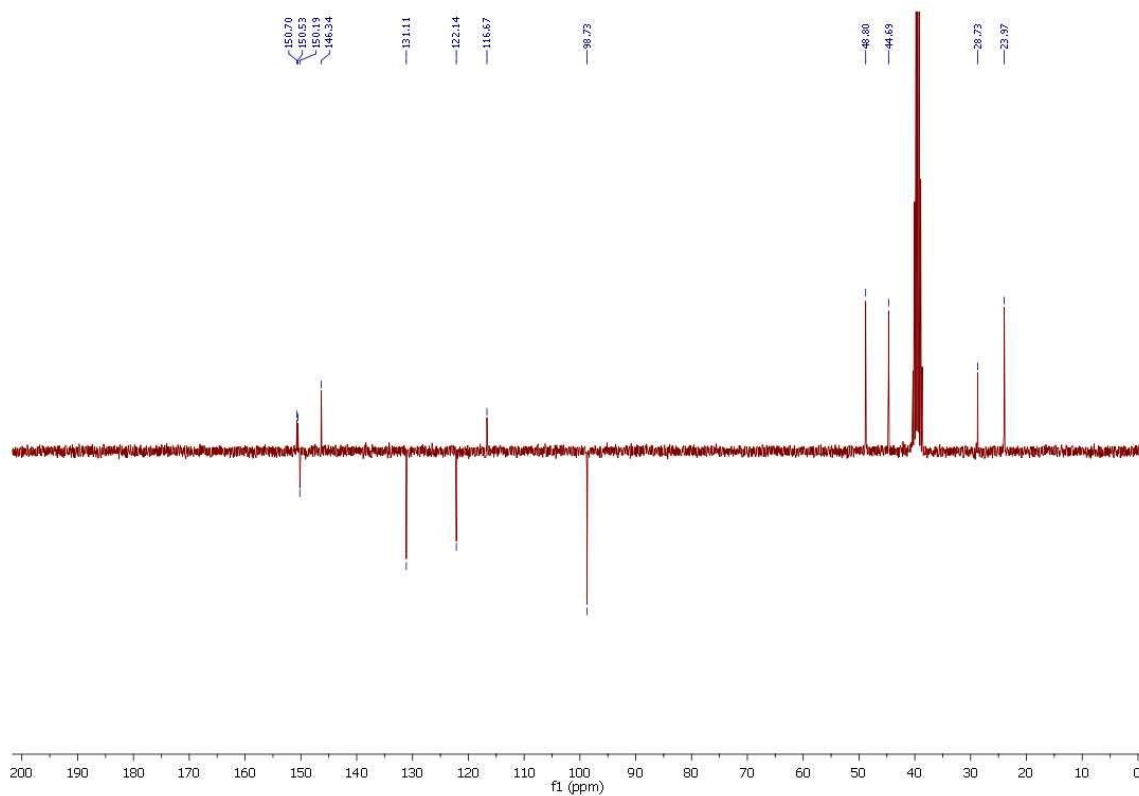

**Fig. S11** a)  $^1\text{H}$  NMR and b)  $^{13}\text{C}$  NMR of compd. **5d**

a)

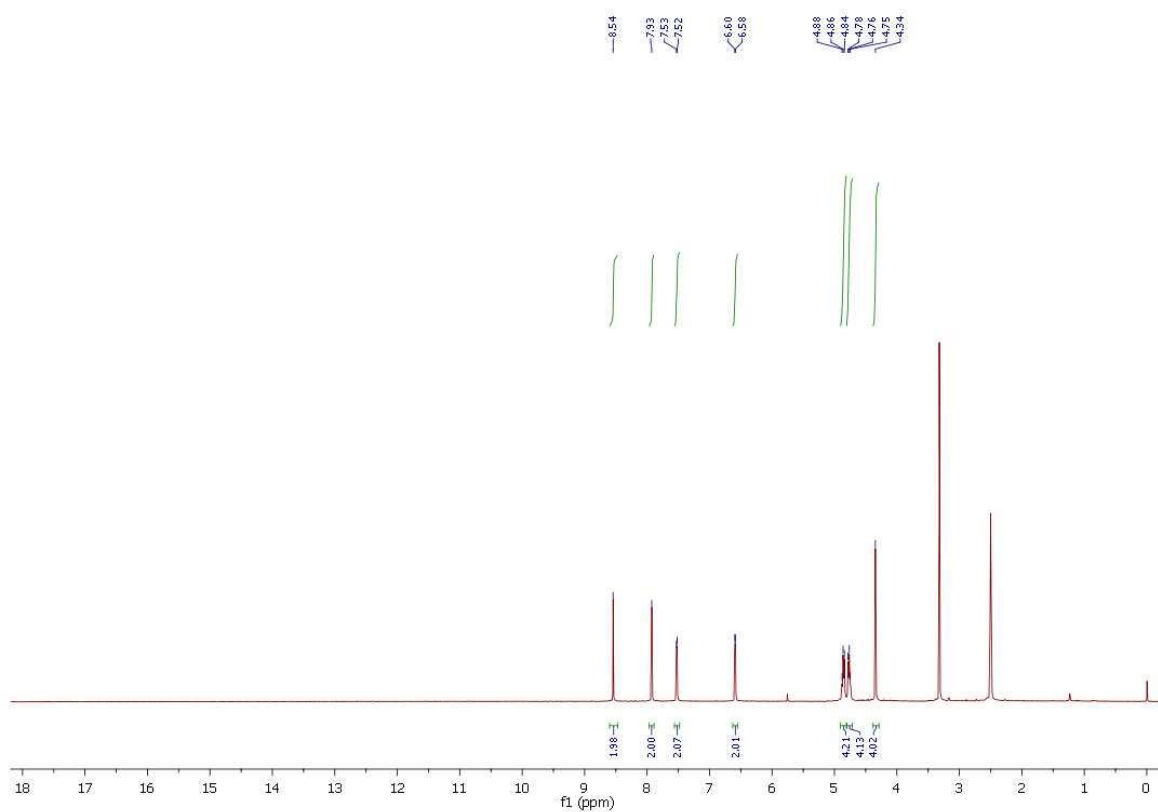

b)

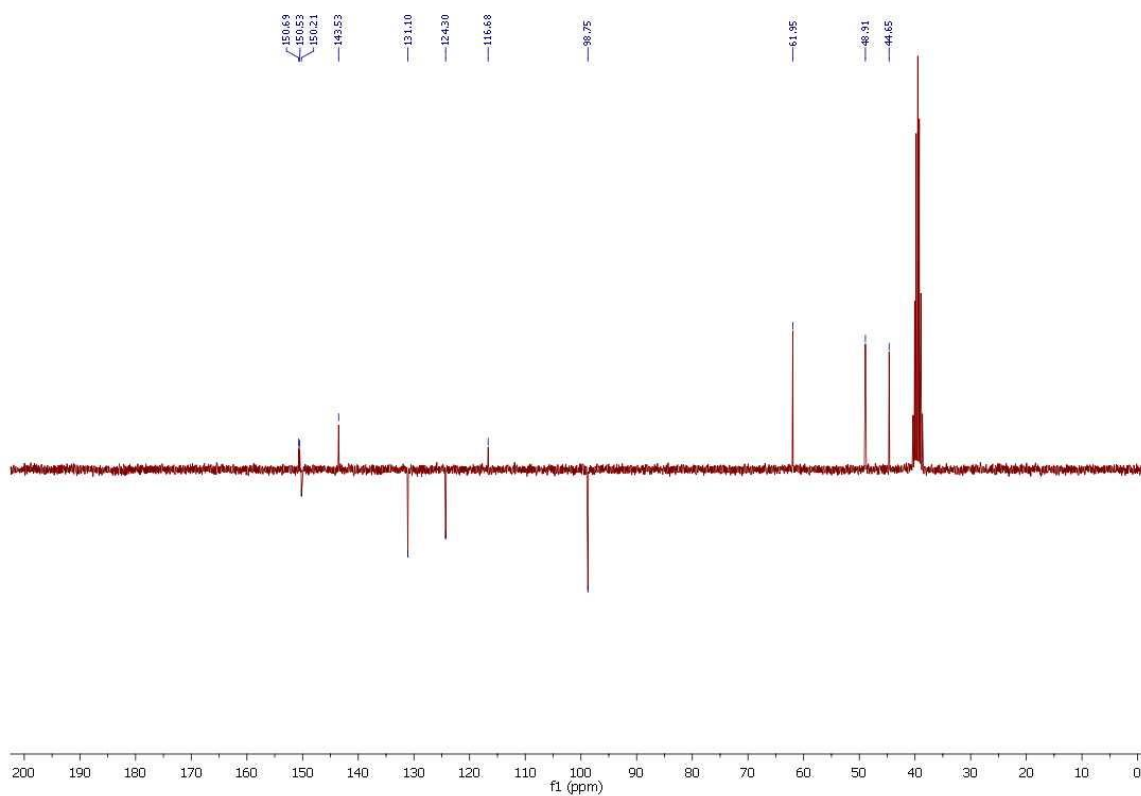

**Fig. S12** a)  $^1\text{H}$  NMR and b)  $^{13}\text{C}$  NMR of compd. **5f**

a)

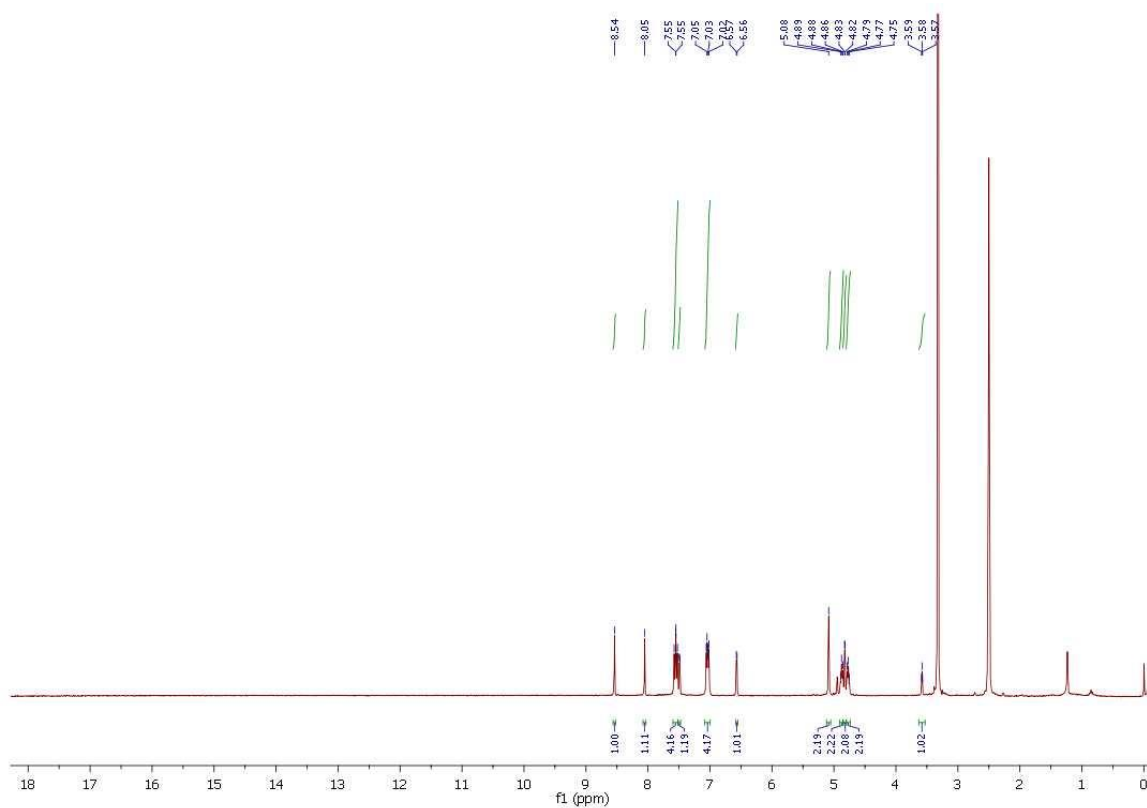

b)

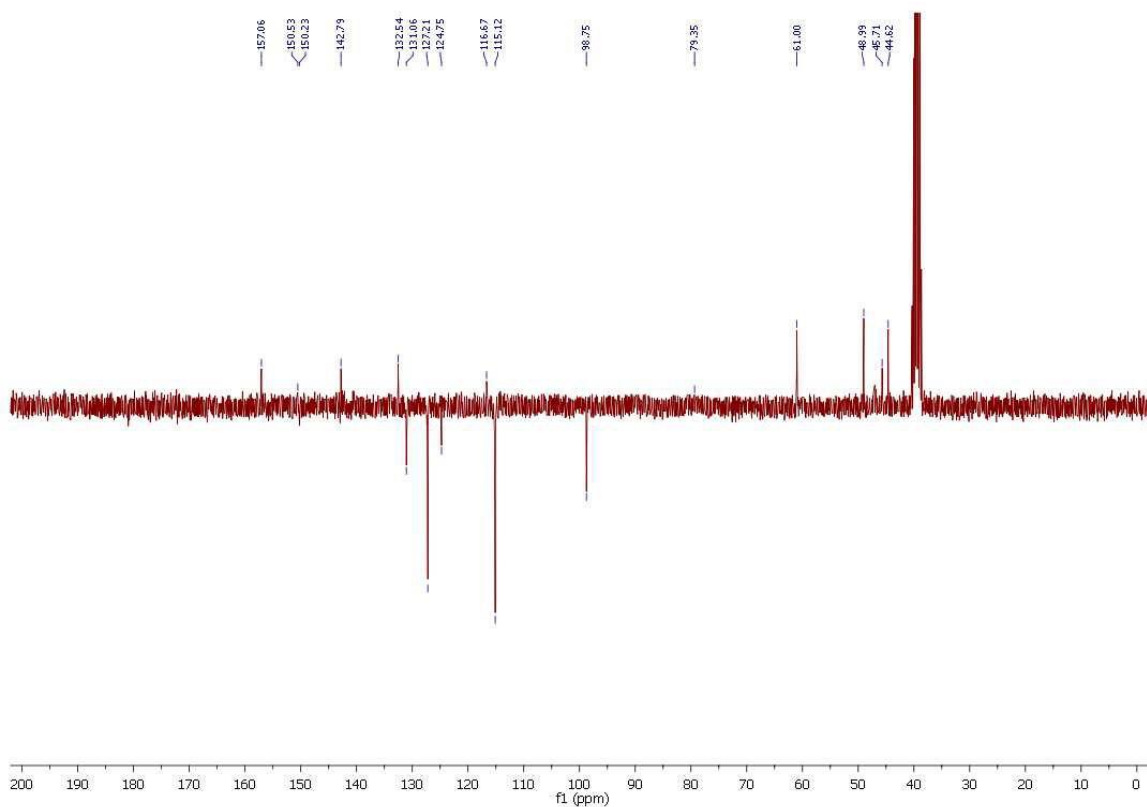

**Fig. S13** a)  $^1\text{H}$  NMR and b)  $^{13}\text{C}$  NMR of compd. **5g**

a)

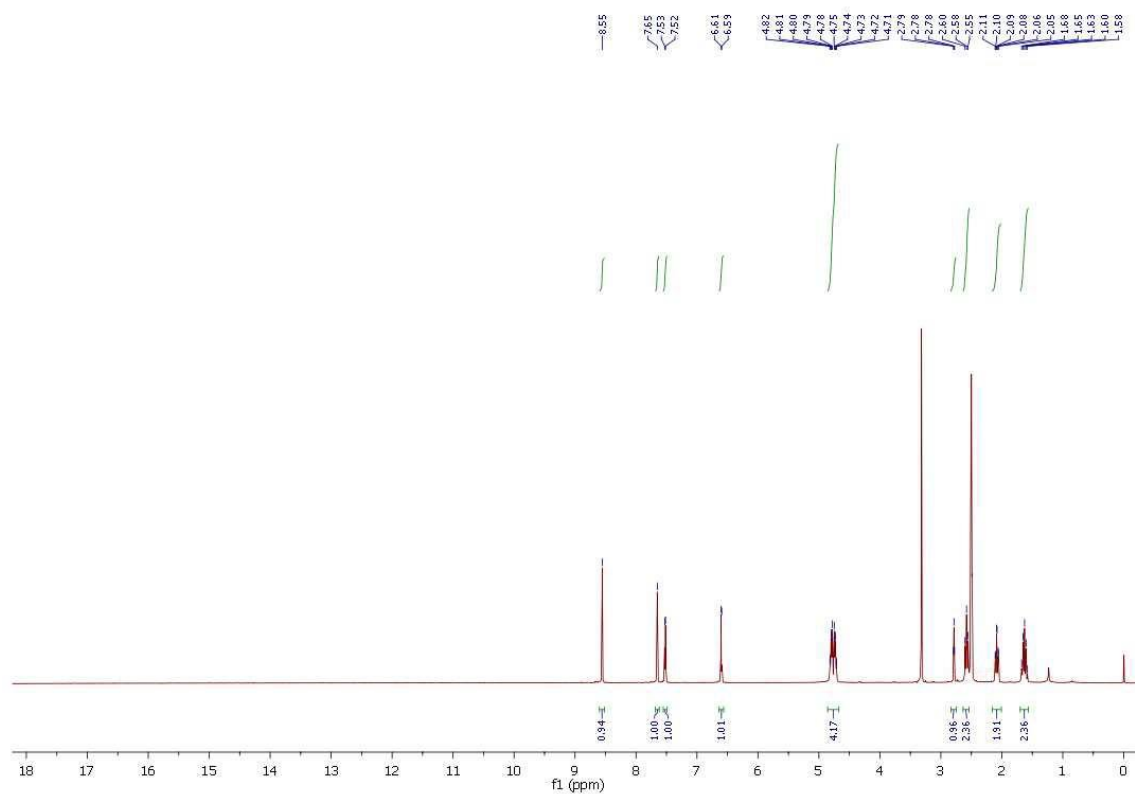

b)

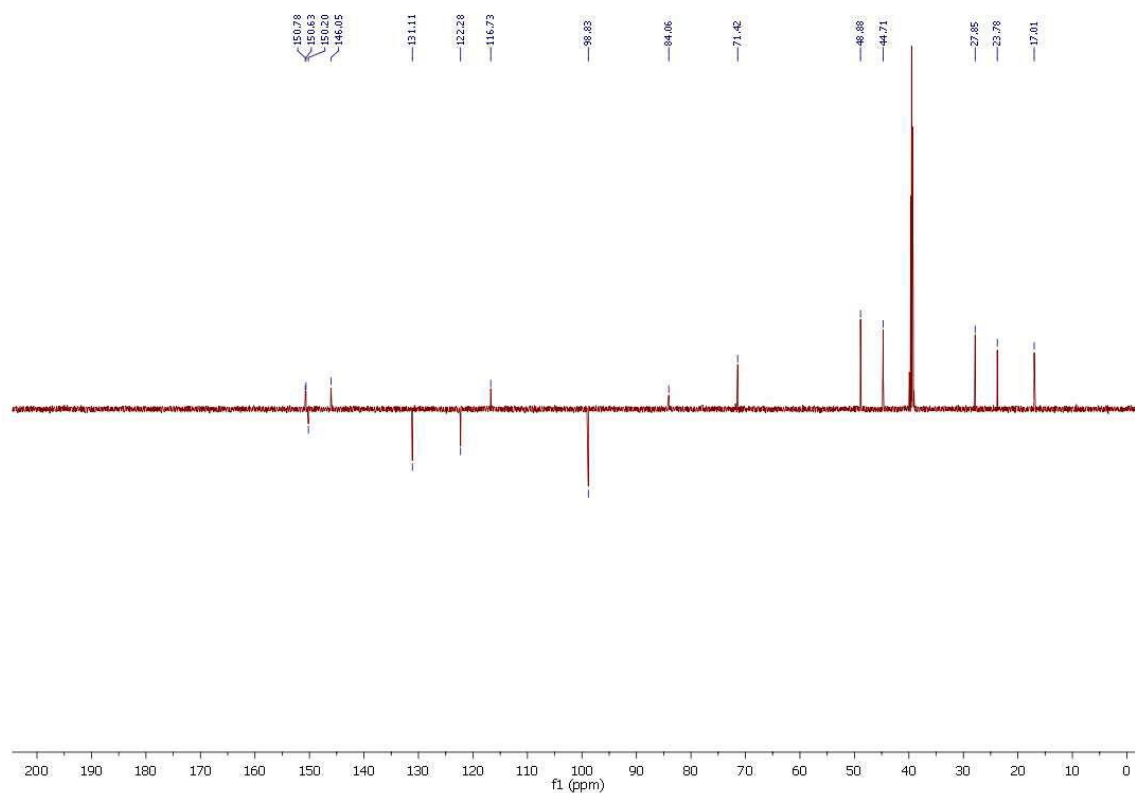

**Fig. S14** a)  $^1\text{H}$  NMR and b)  $^{13}\text{C}$  NMR of compd. **6a**

a)

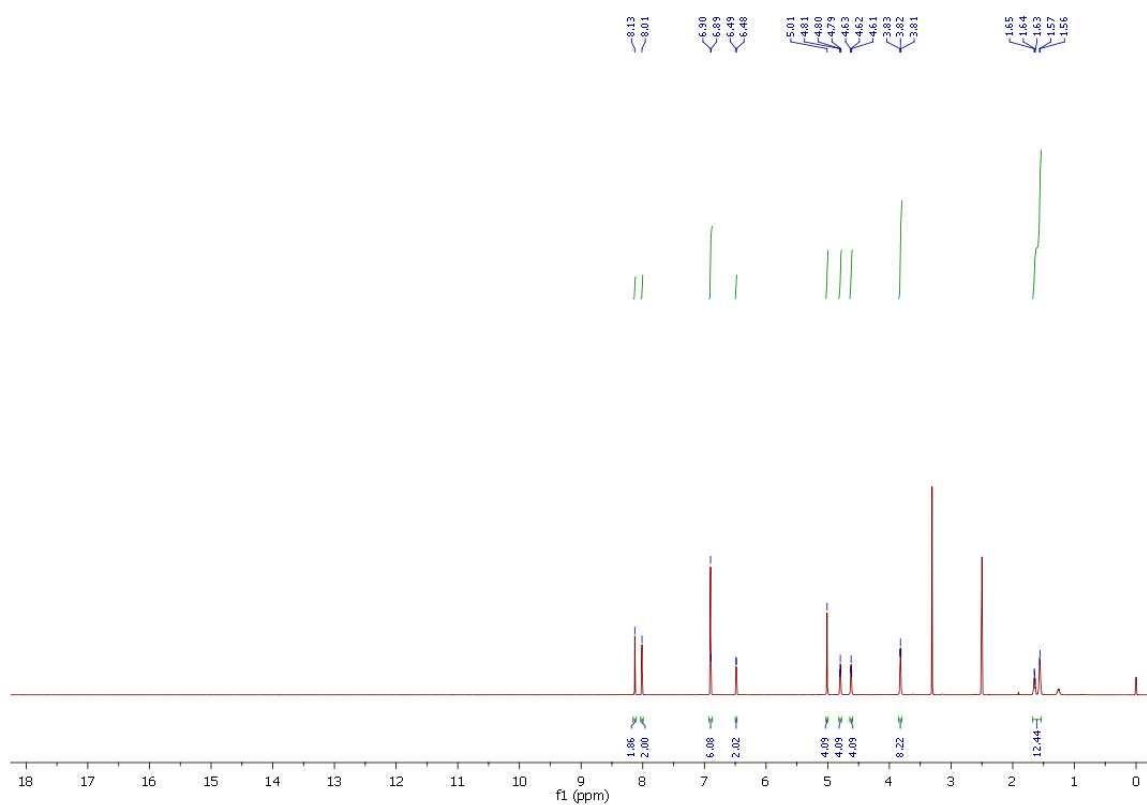

b)

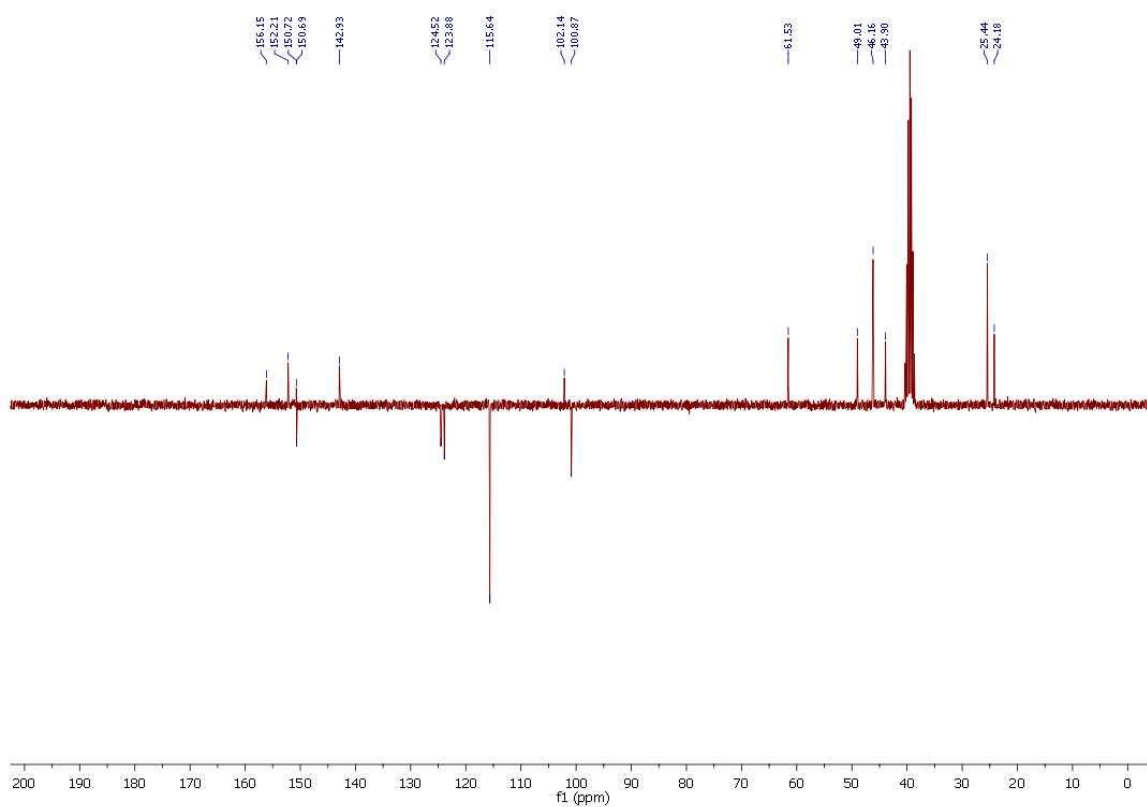

**Fig. S15** a)  $^1\text{H}$  NMR and b)  $^{13}\text{C}$  NMR of compd. **6b**

a)

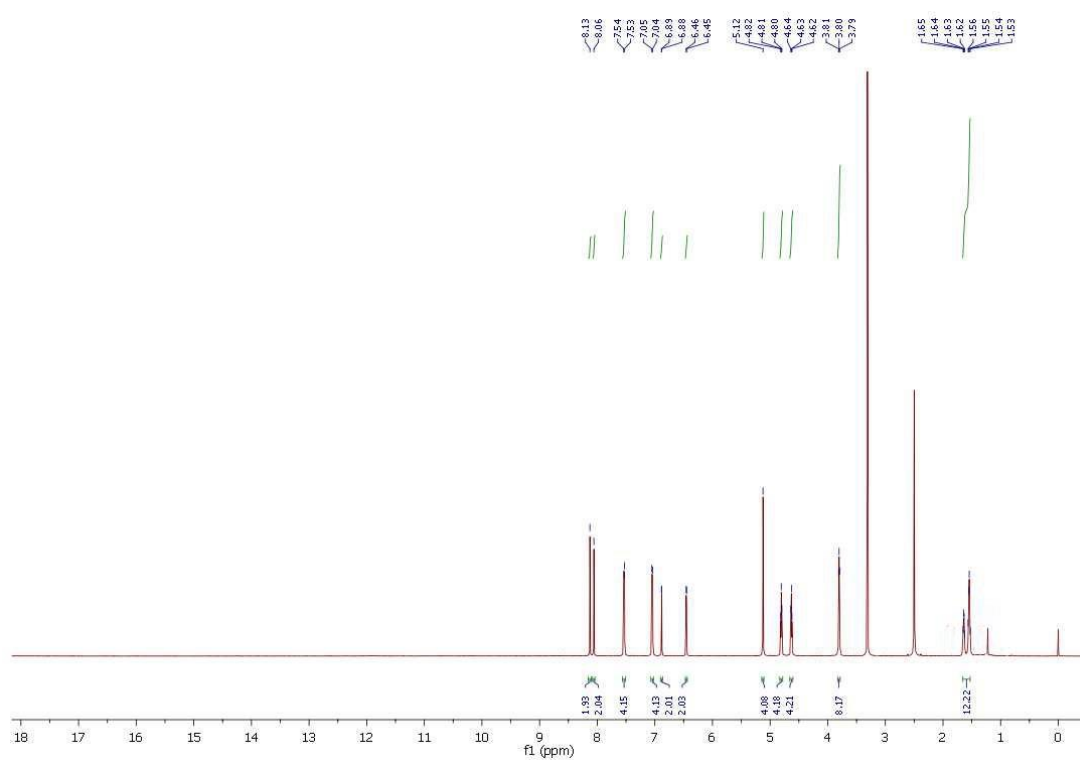

b)

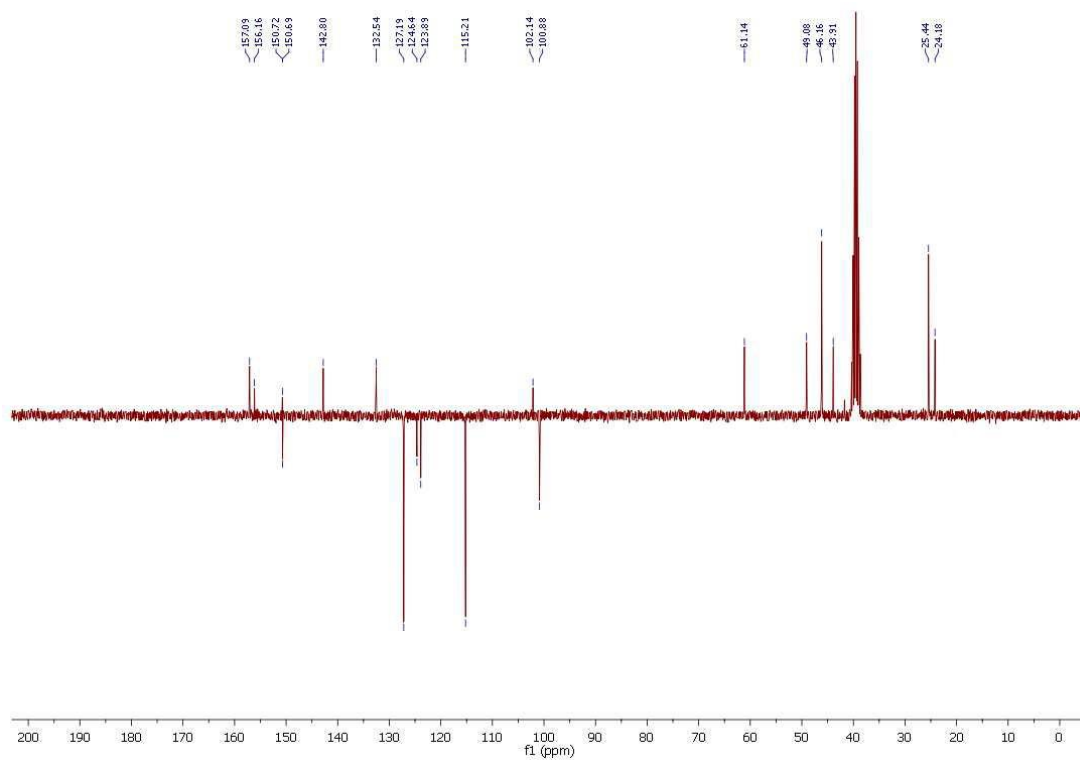



**Fig. S16** a)  $^1\text{H}$  NMR and b)  $^{13}\text{C}$  NMR of compd. **6c**

a)

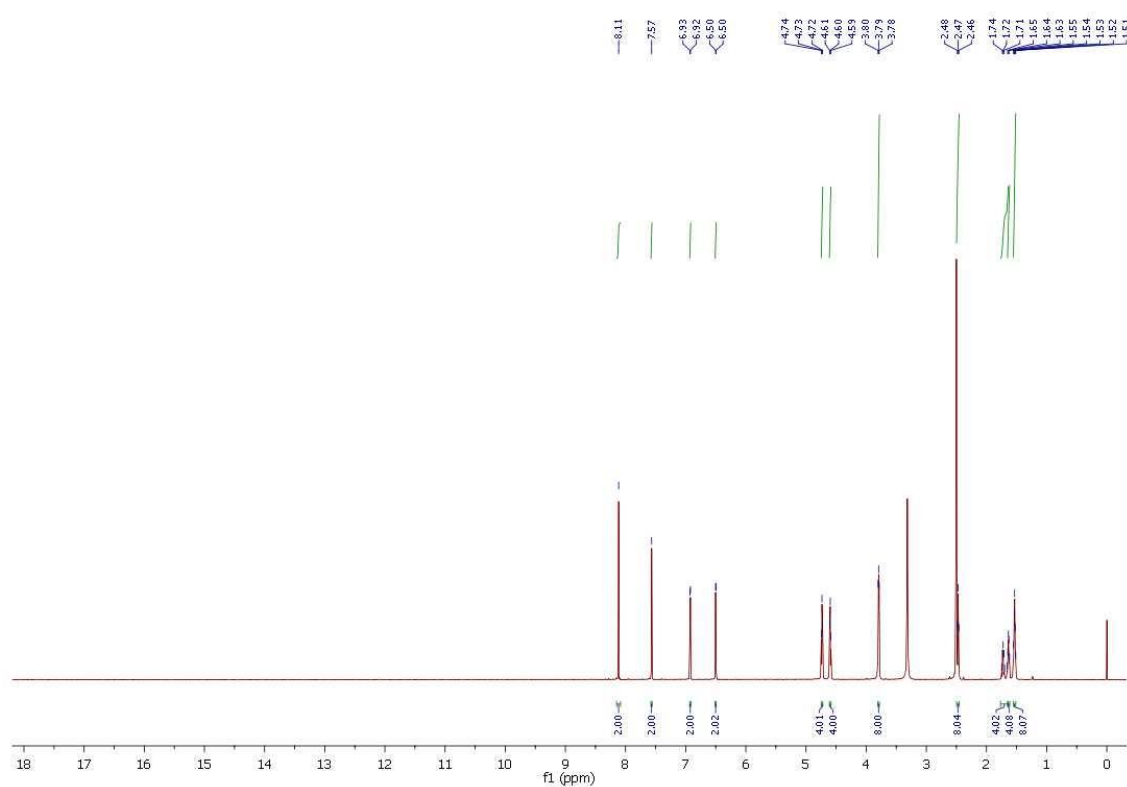

b)

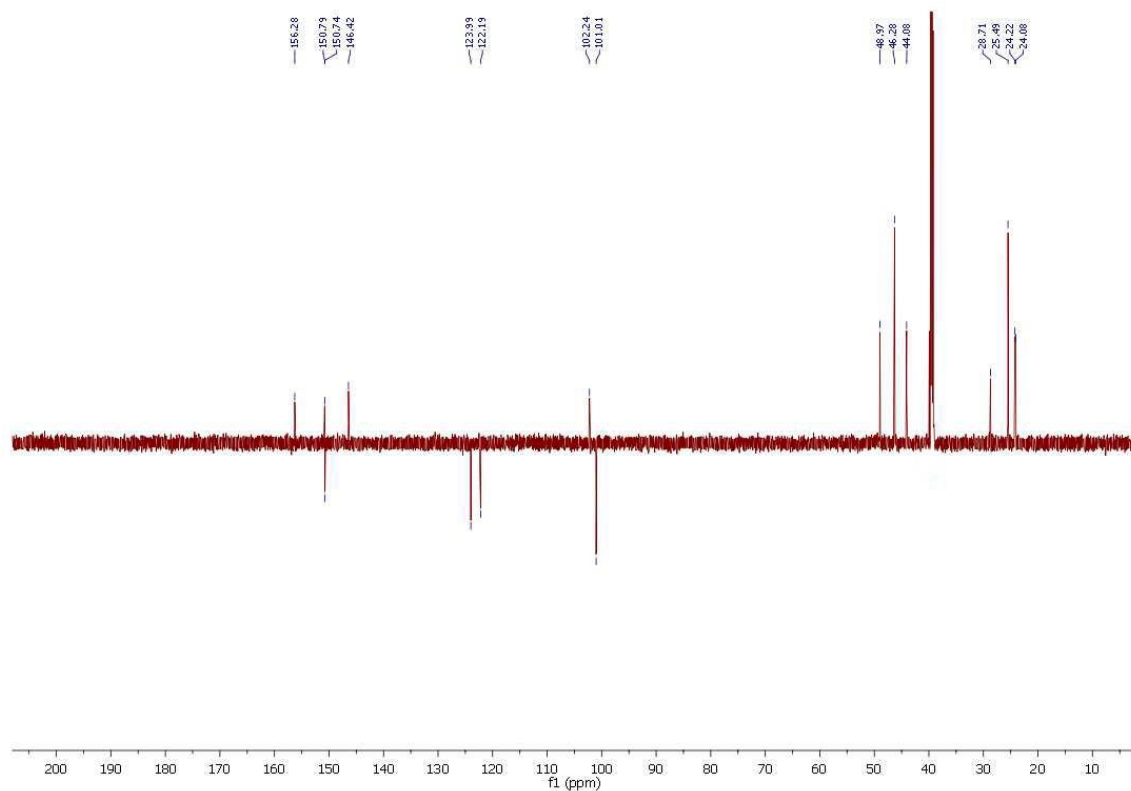

**Fig. S17** a)  $^1\text{H}$  NMR and b)  $^{13}\text{C}$  NMR of compd. **6d**

a)

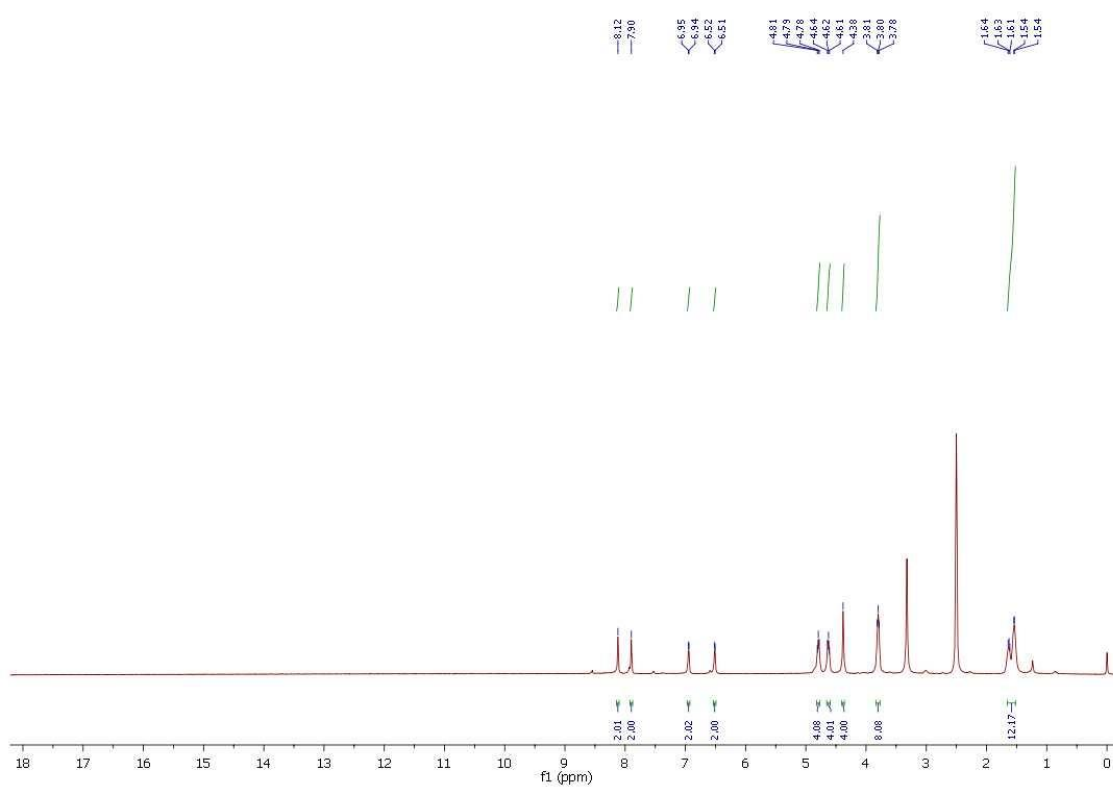

b)

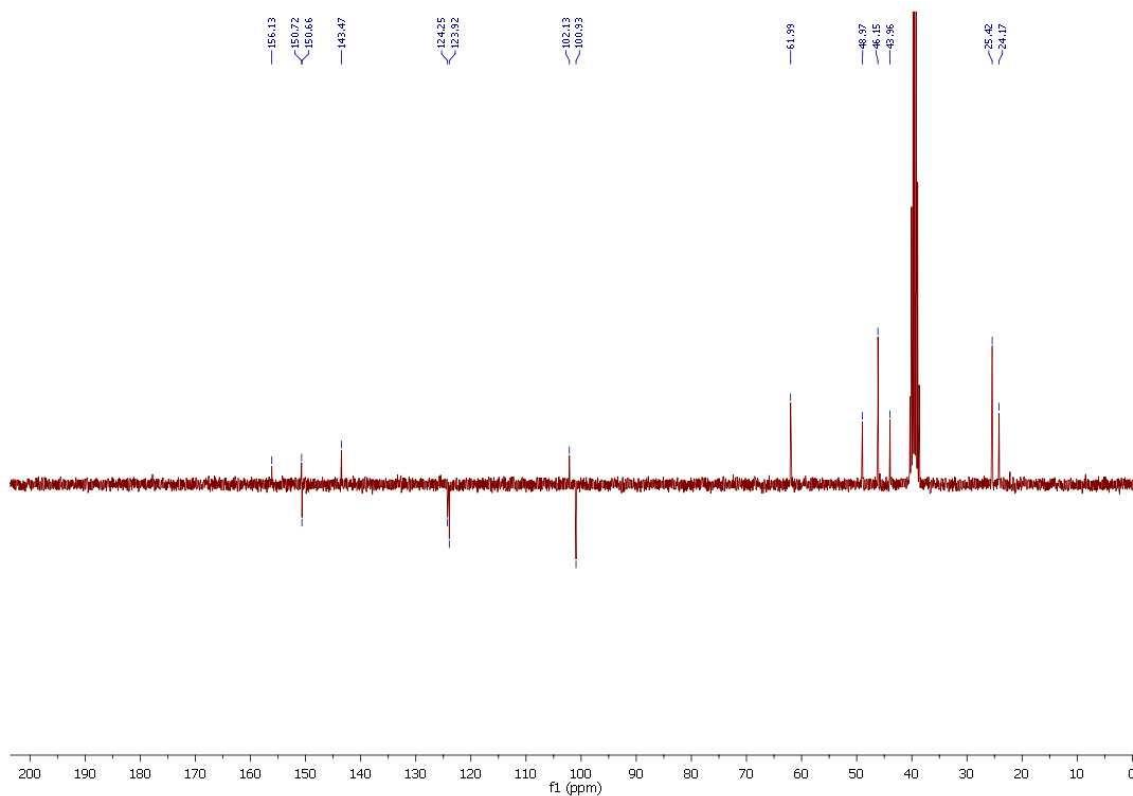

**Fig. S18** a)  $^1\text{H}$  NMR and b)  $^{13}\text{C}$  NMR of compd. **7a**

a)

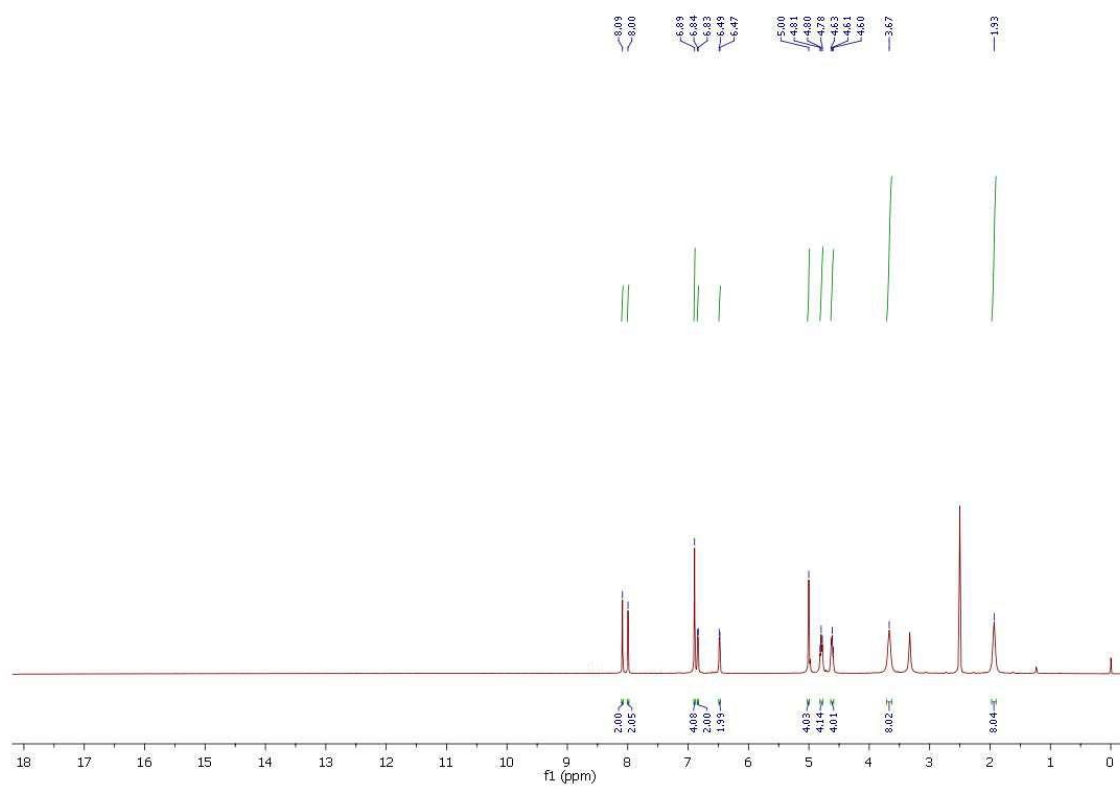

b)

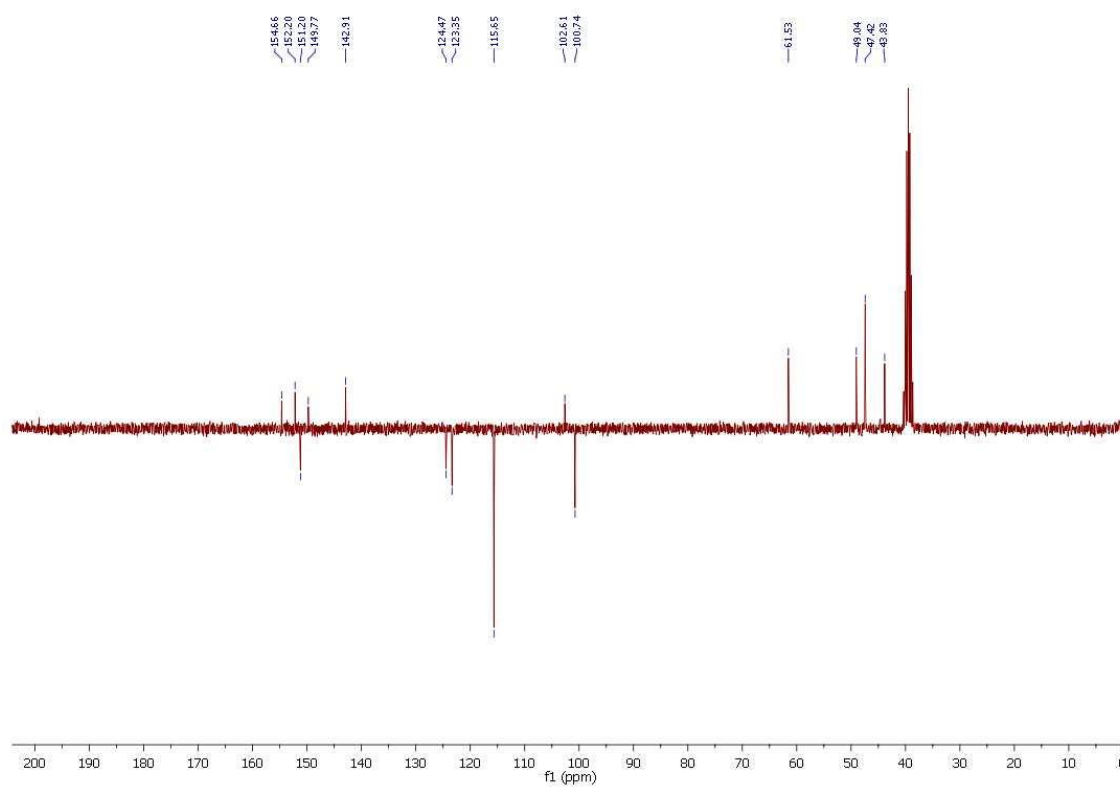

**Fig. S19** a)  $^1\text{H}$  NMR and b)  $^{13}\text{C}$  NMR of compd. **7b**

a)

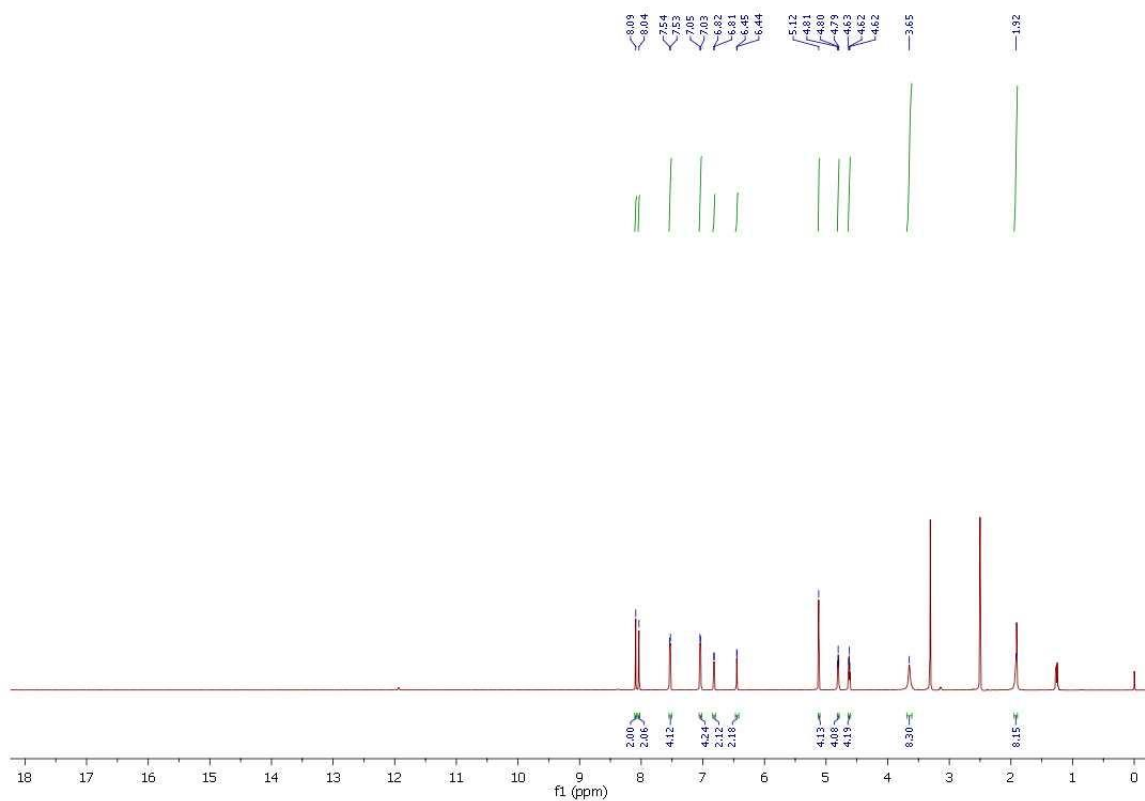

b)

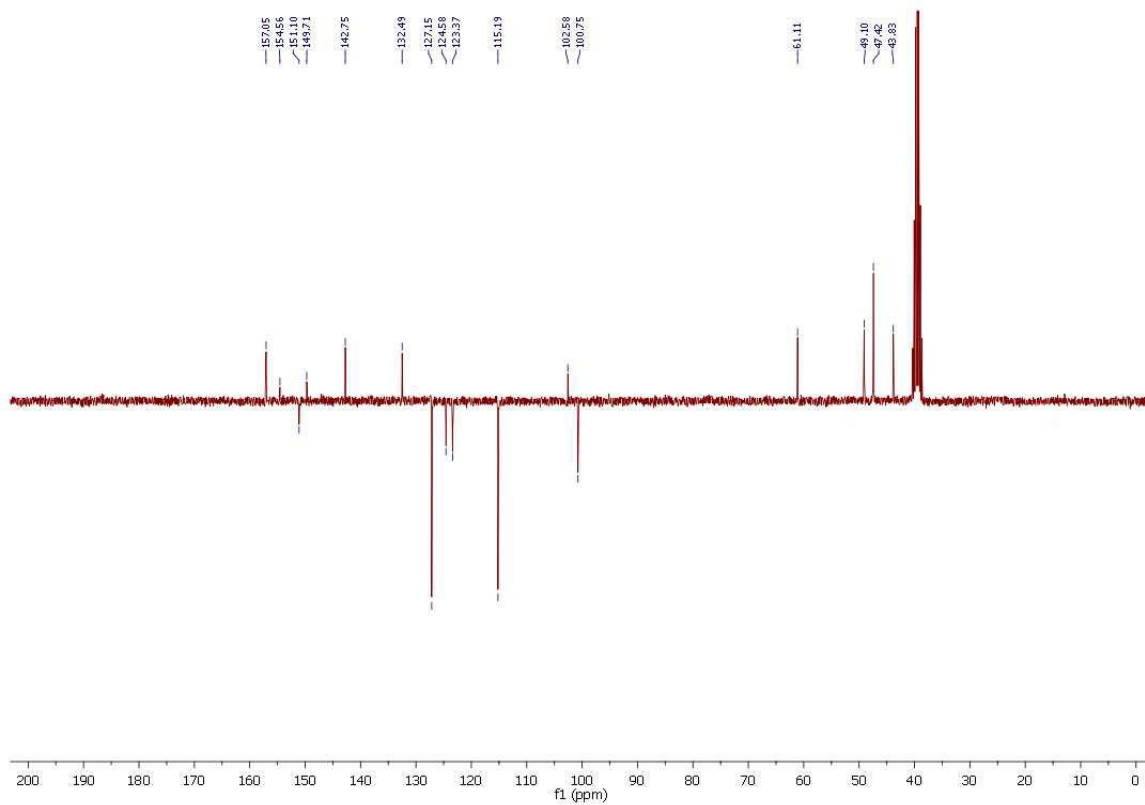

**Fig. S20** a)  $^1\text{H}$  NMR and b)  $^{13}\text{C}$  NMR of compd. **7c**

a)

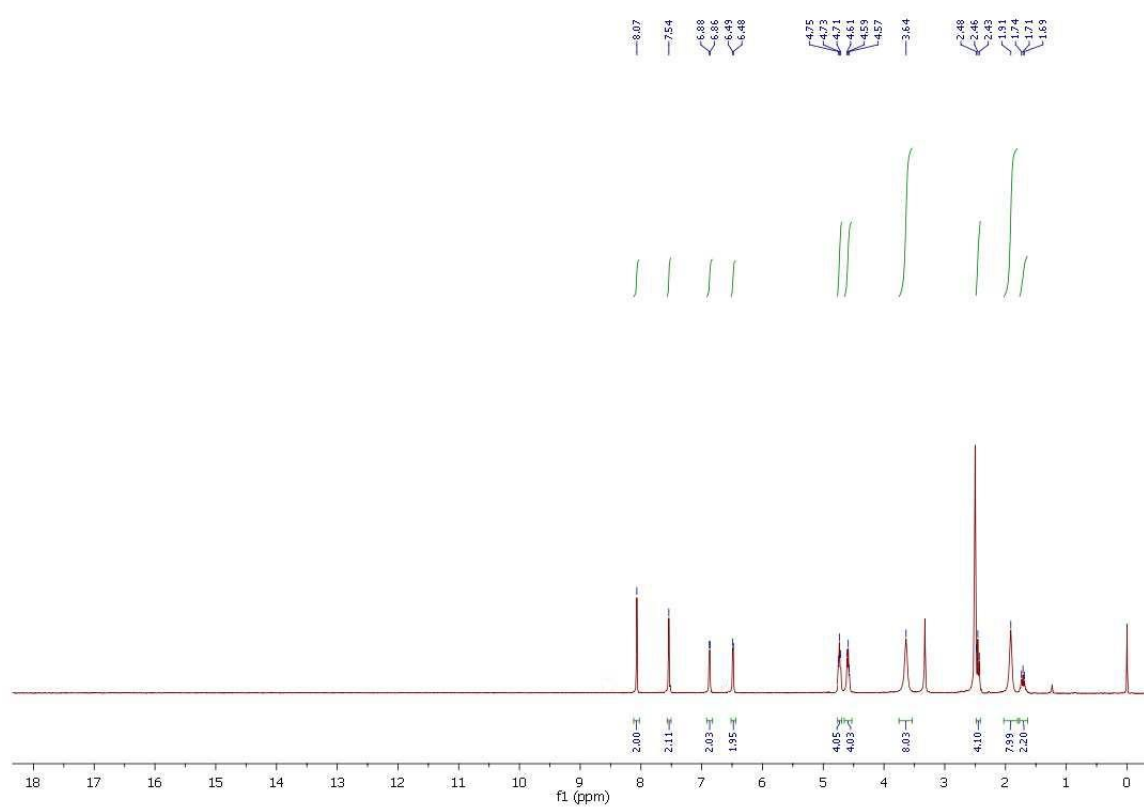

b)

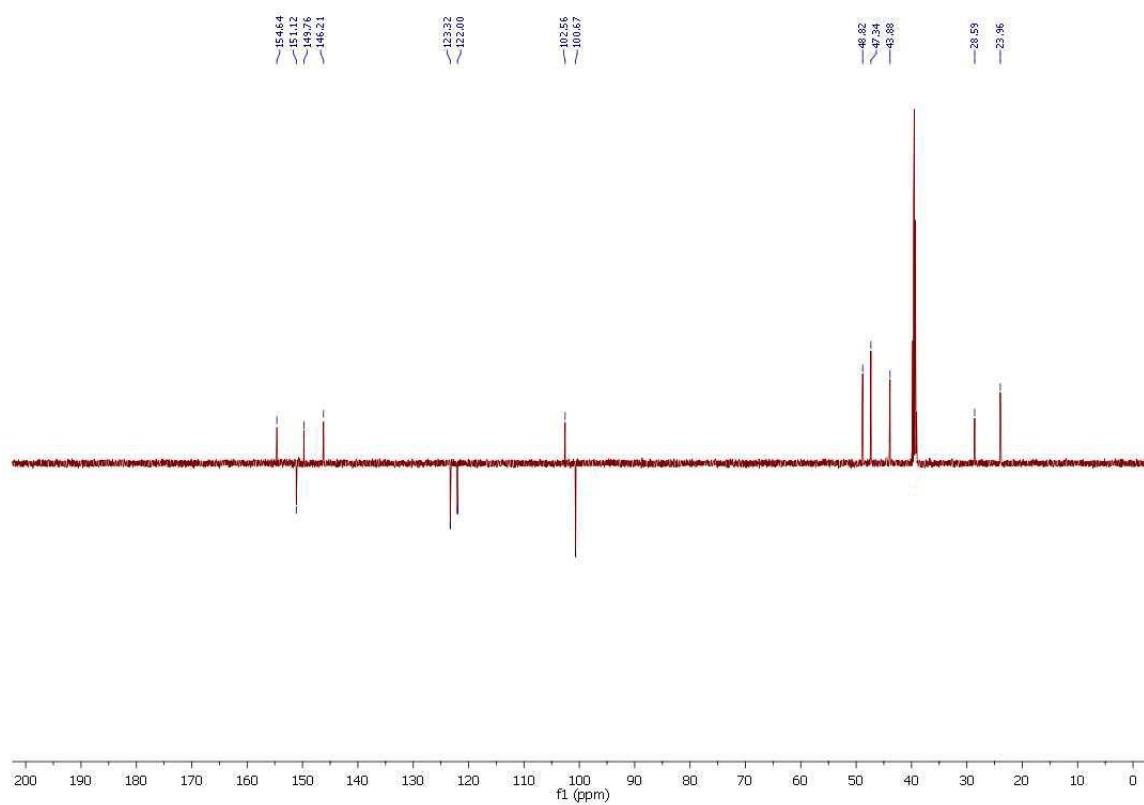

**Fig. S21** a)  $^1\text{H}$  NMR and b)  $^{13}\text{C}$  NMR of compd. **7d**

a)

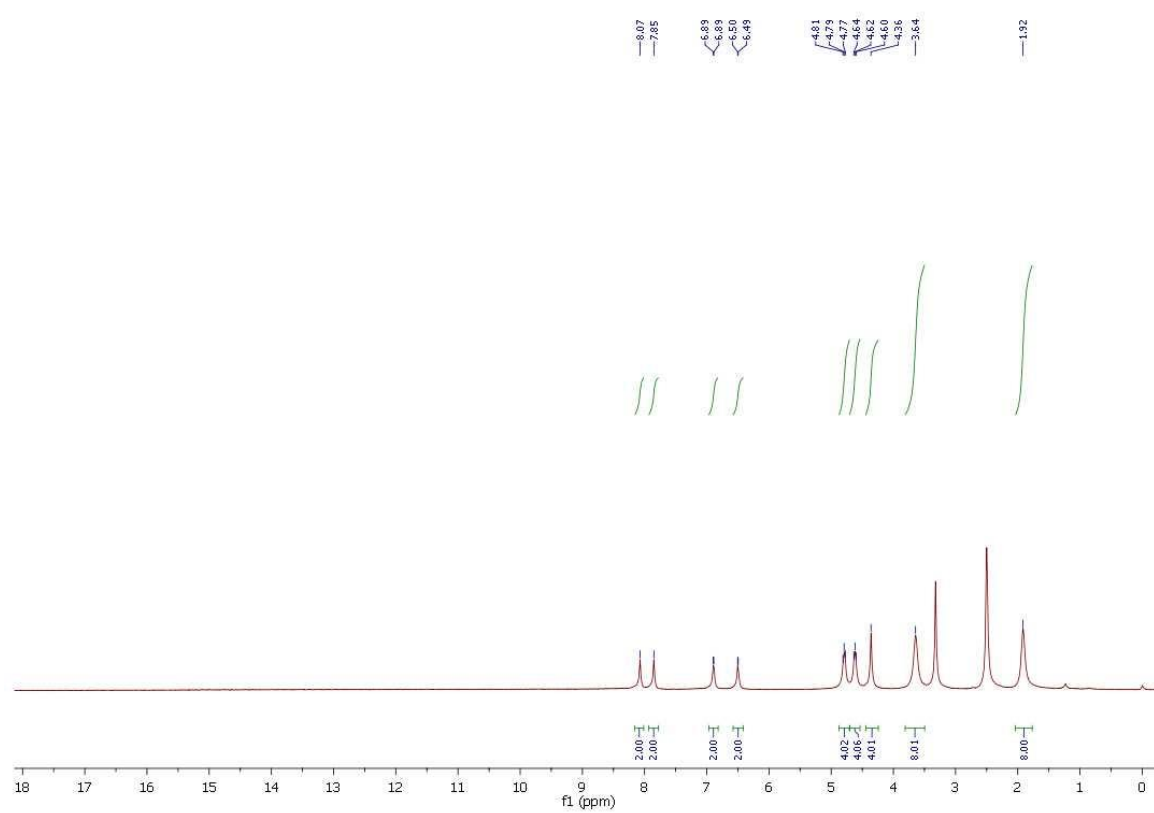

b)

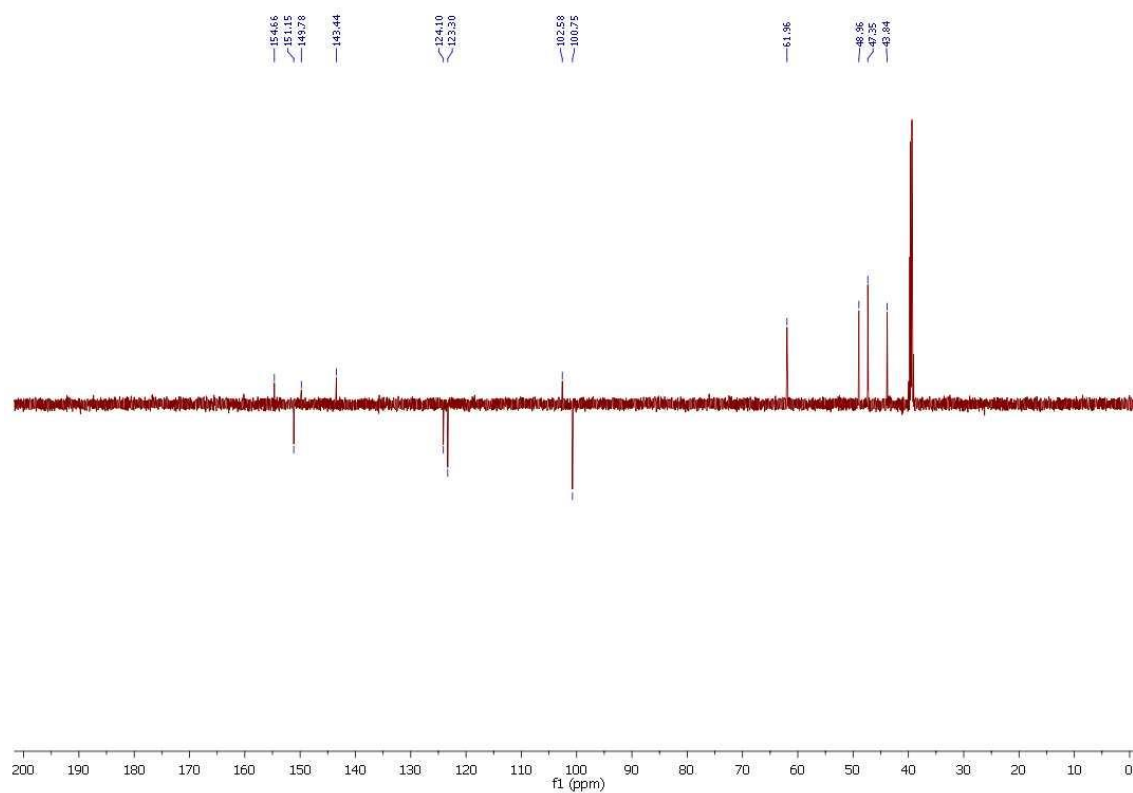

**Fig. S22** a)  $^1\text{H}$  NMR and b)  $^{13}\text{C}$  NMR of compd. **8g NS-75-1**

a)

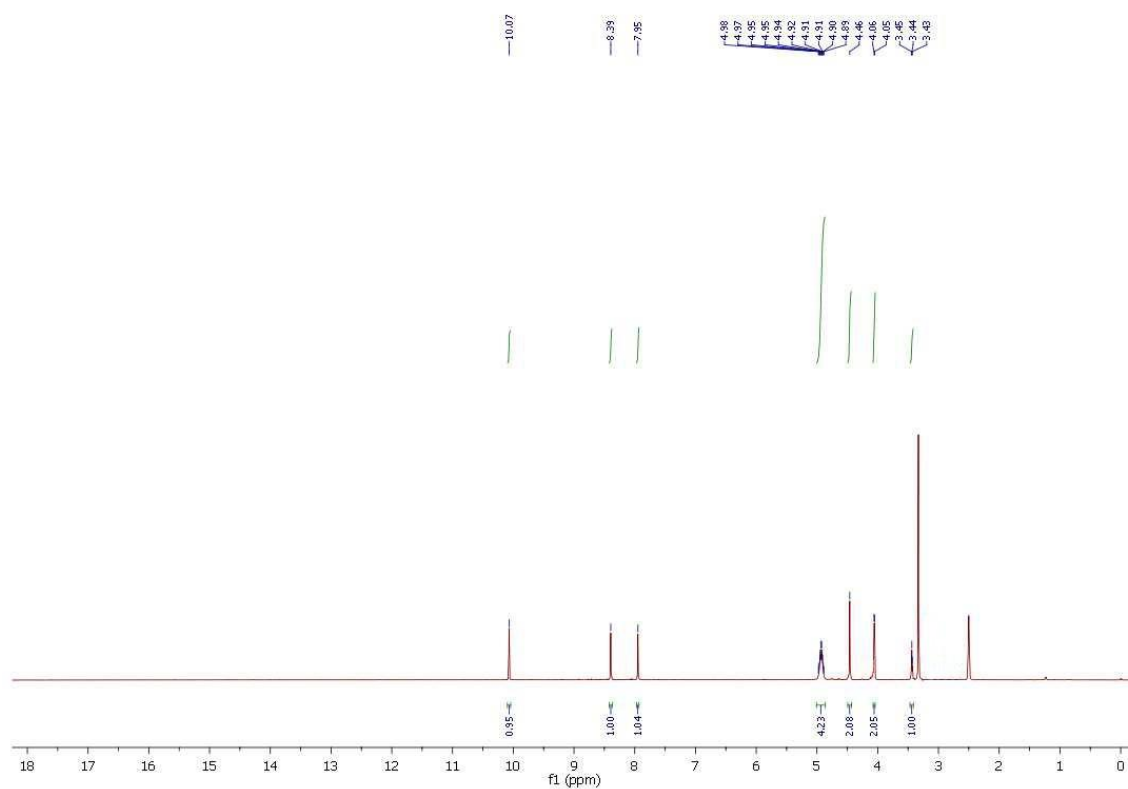

b)

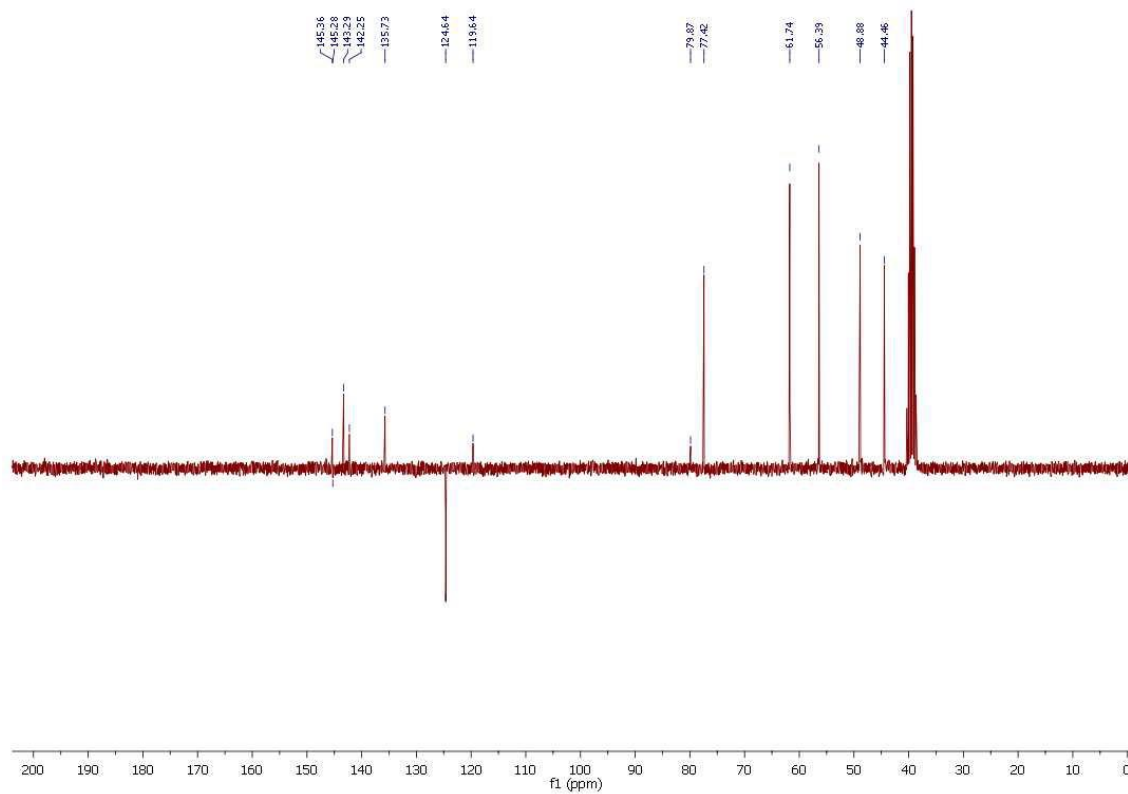

**Fig. S23** a)  $^1\text{H}$  NMR and b)  $^{13}\text{C}$  NMR of compd. **9a A-260-Bis**

a)

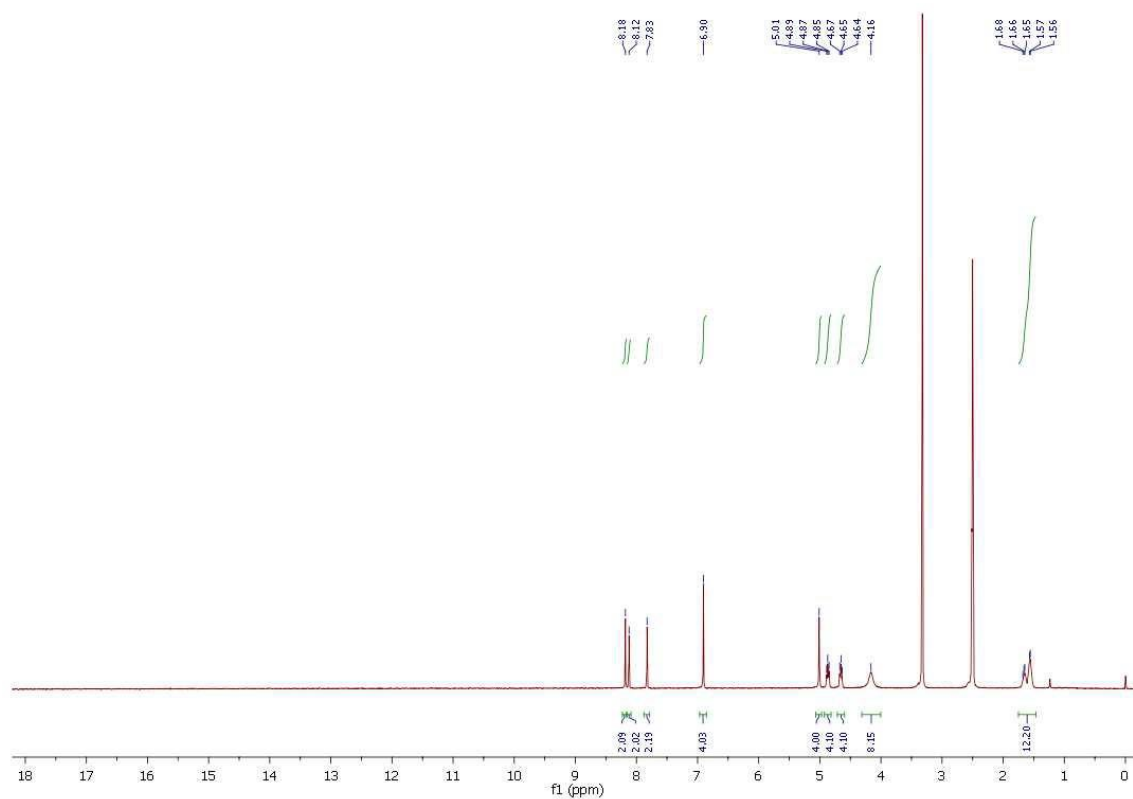

b)

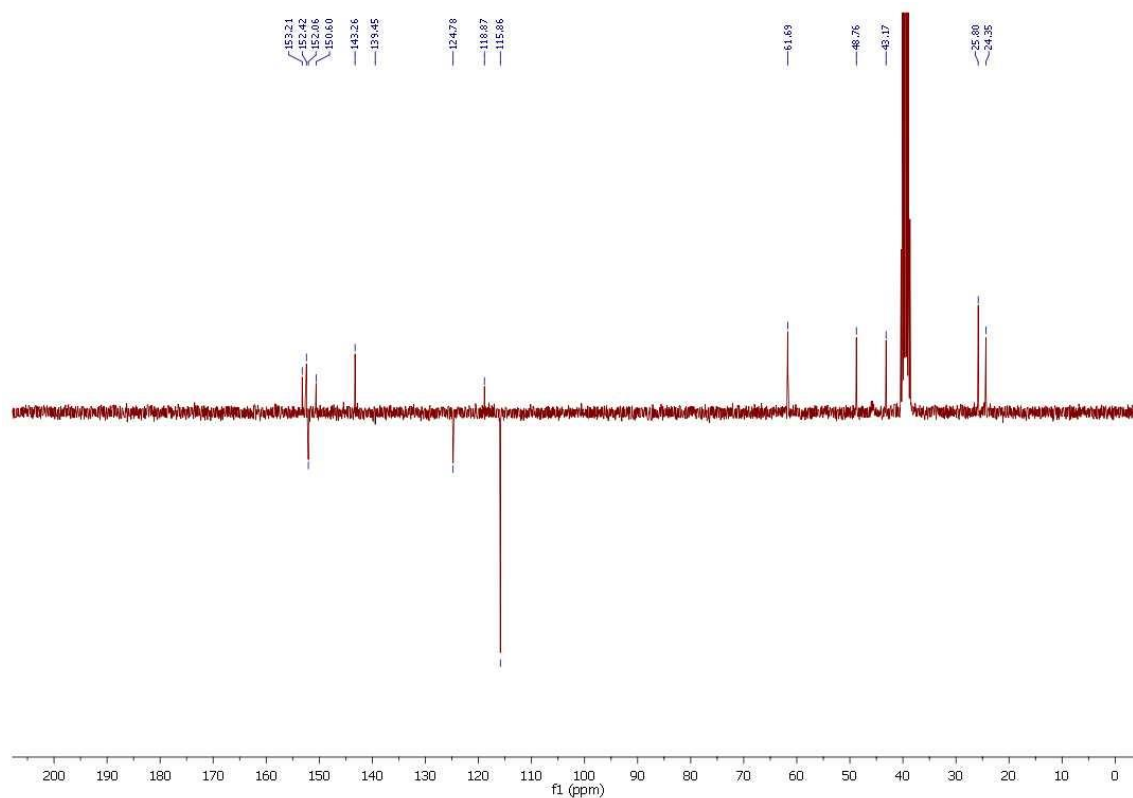



**Fig. S24** a)  $^1\text{H}$  NMR and b)  $^{13}\text{C}$  NMR of compd. **9b A-261-Bis**

a)

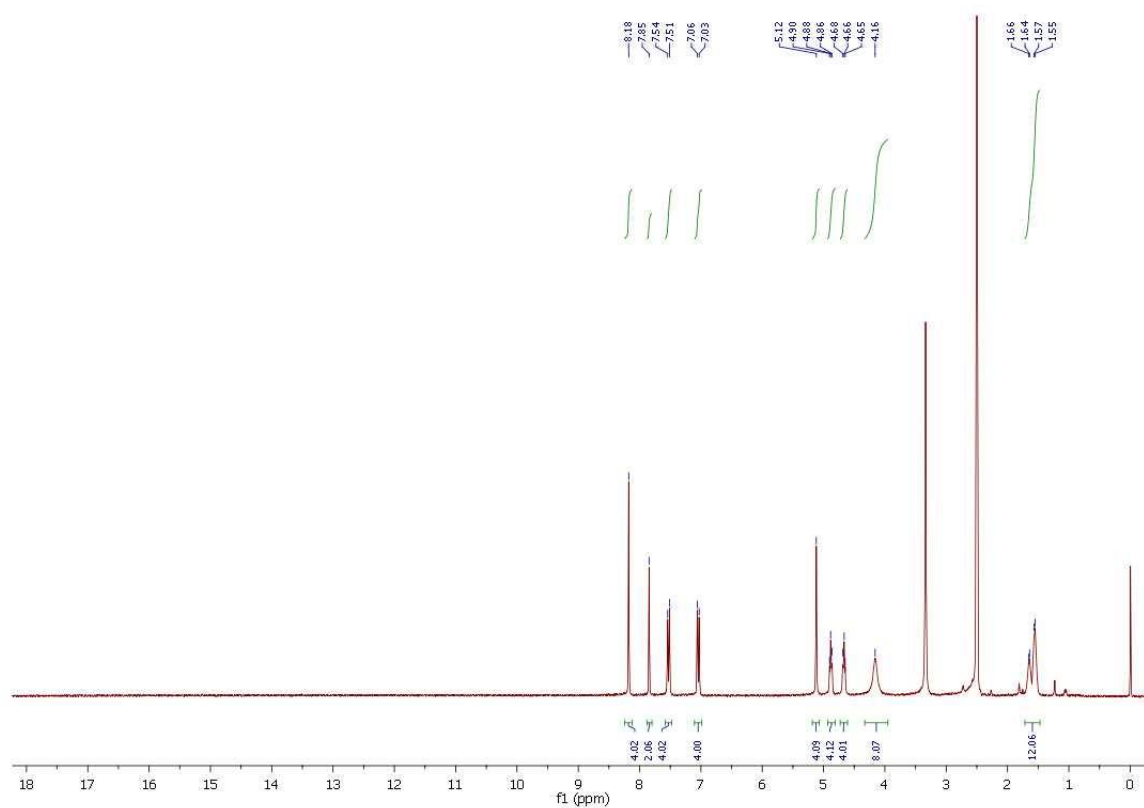

b)

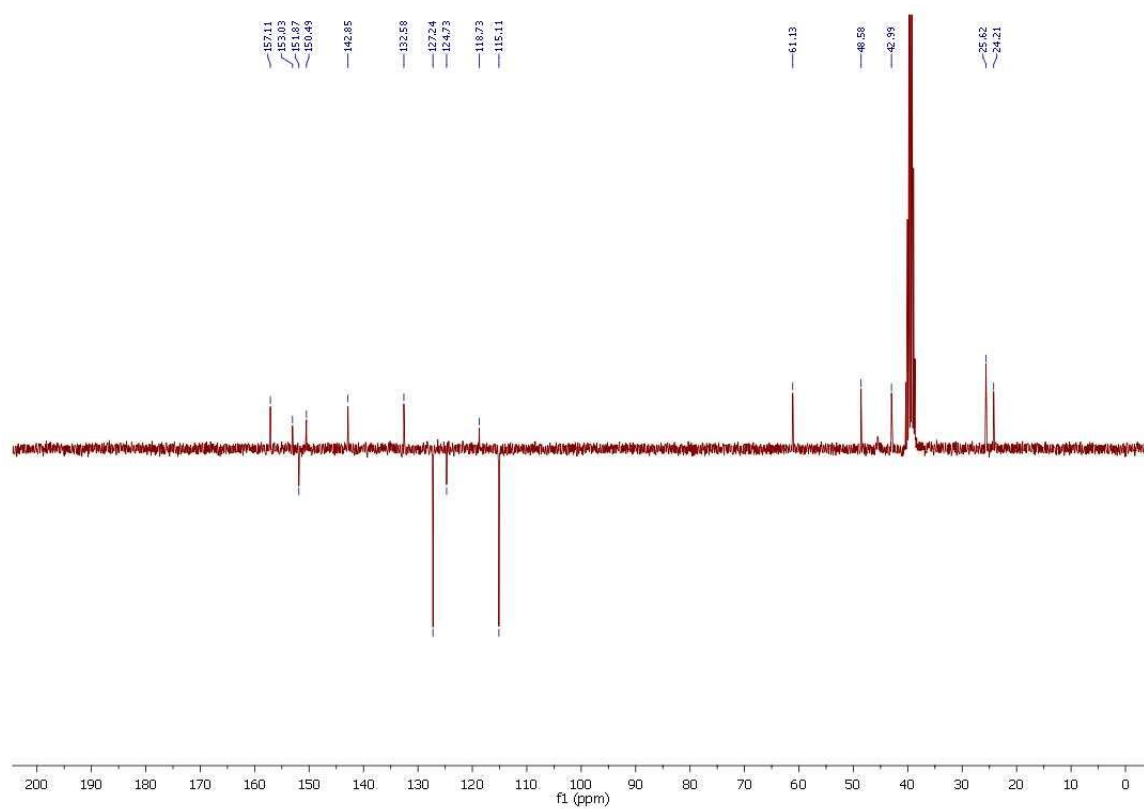

**Fig. S25** a)  $^1\text{H}$  NMR and b)  $^{13}\text{C}$  NMR of compd. **9c A-262-Bis**

a)

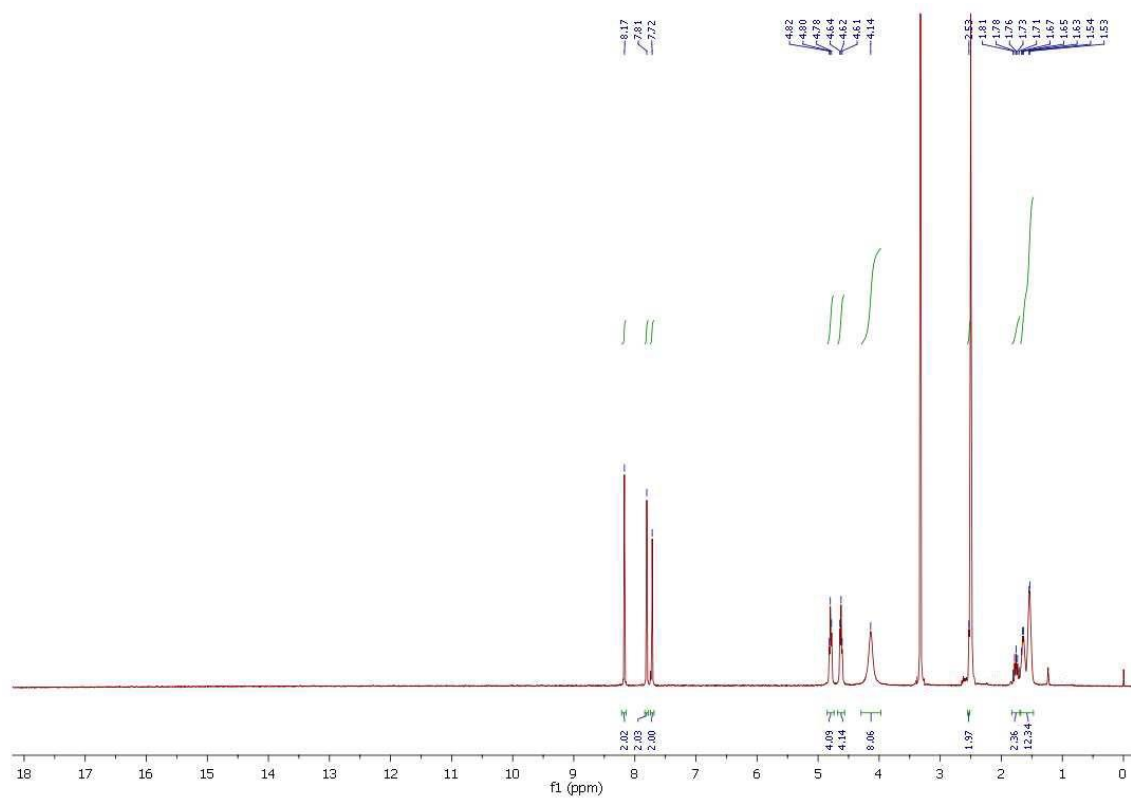

b)

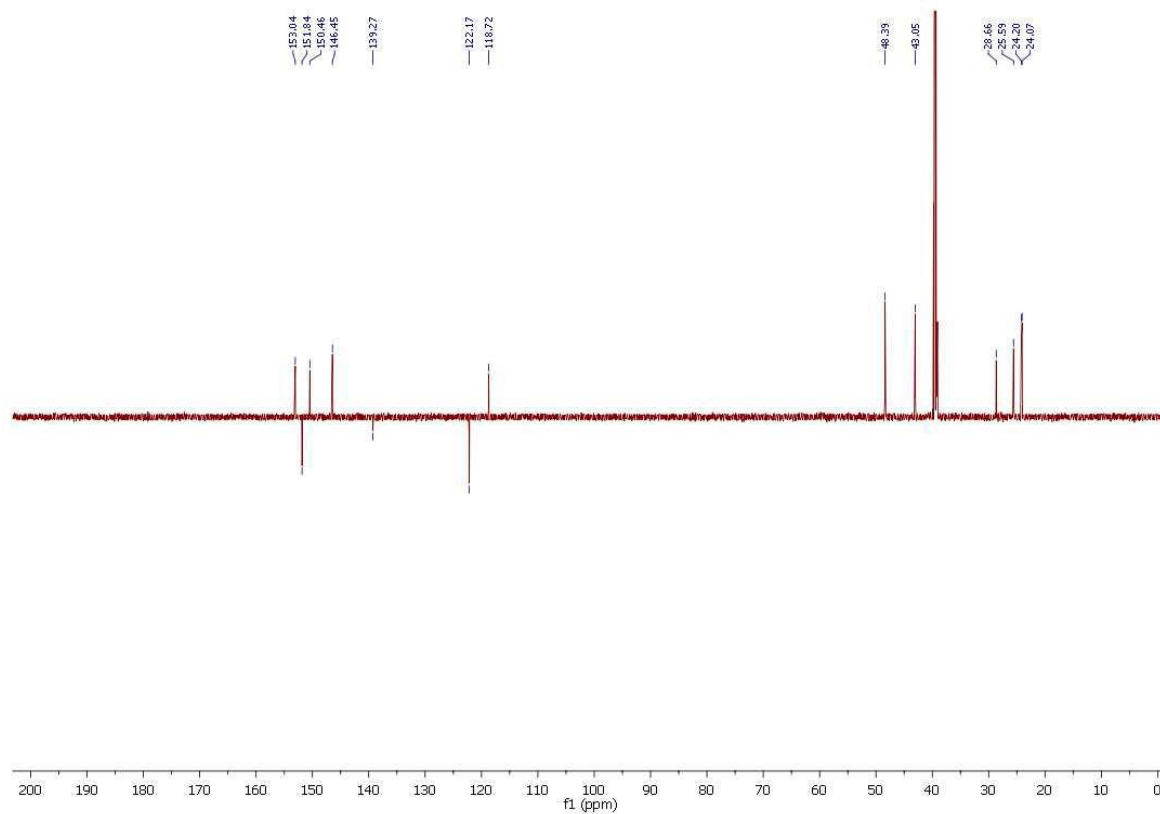

**Fig. S26** a)  $^1\text{H}$  NMR and b)  $^{13}\text{C}$  NMR of compd. **9d A-266-Bis**

a)

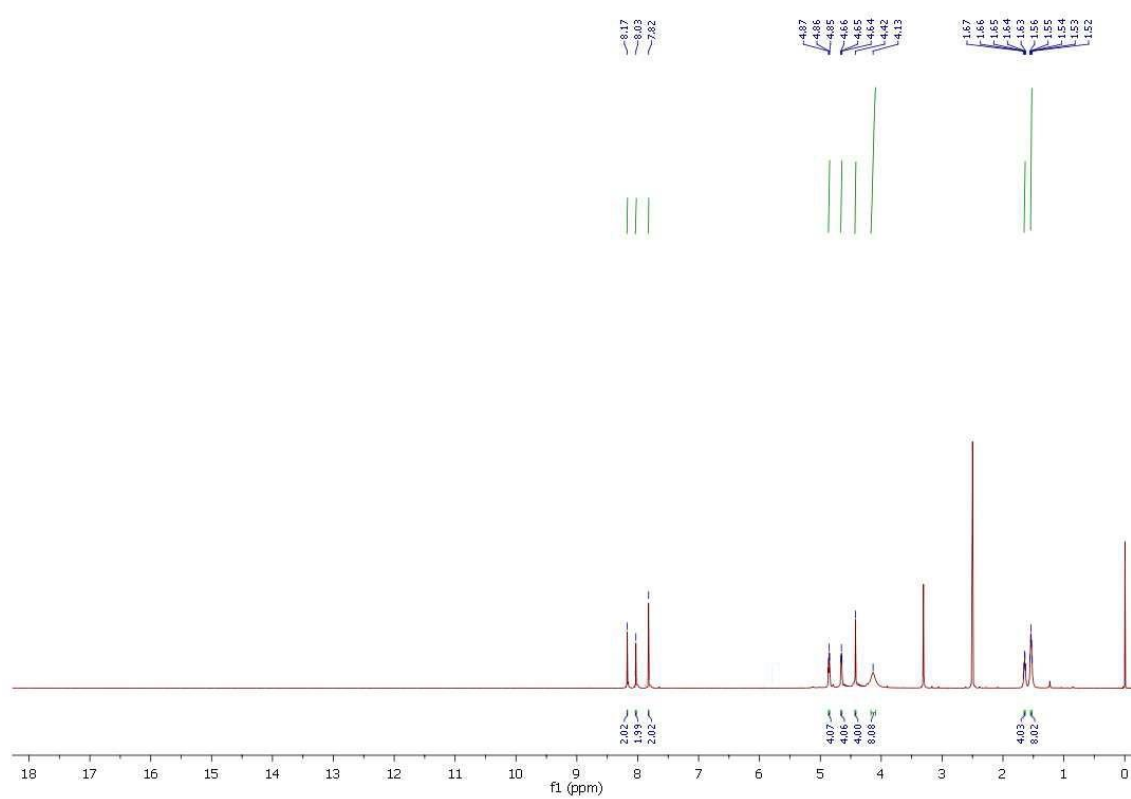

b)

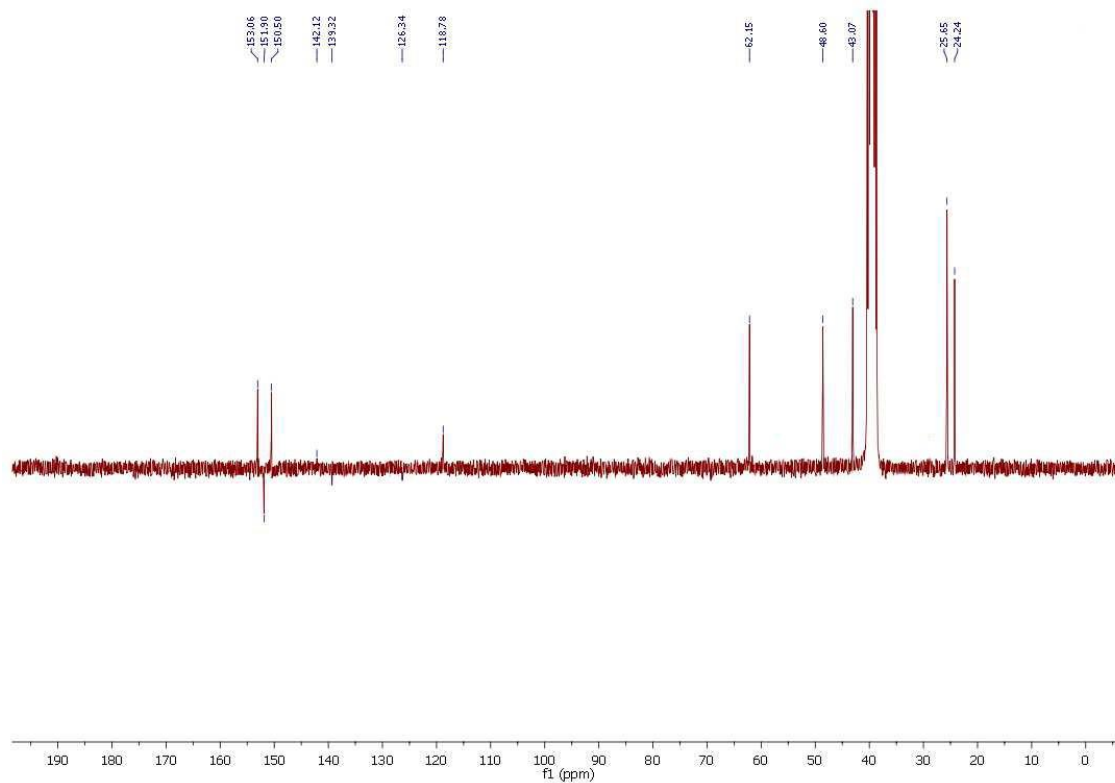

**Fig. S27** a)  $^1\text{H}$  NMR and b)  $^{13}\text{C}$  NMR of compd. **9e A-260-Mono**

a)

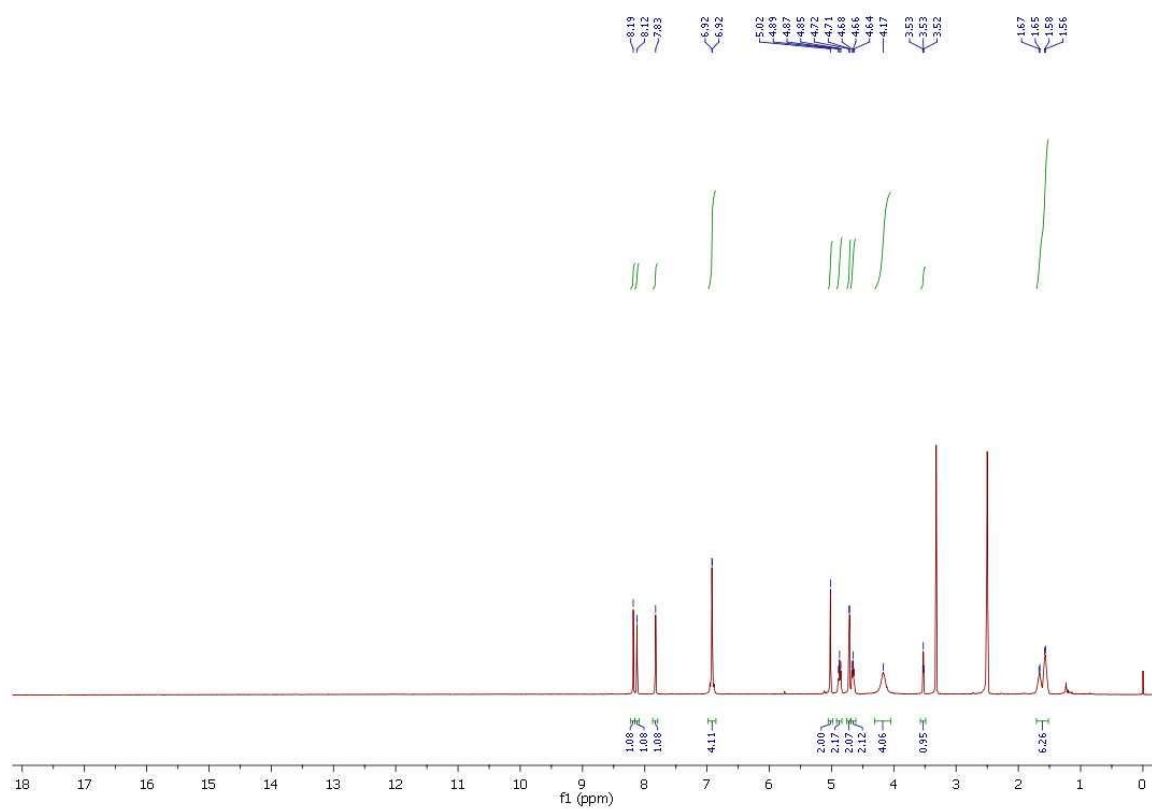

b)

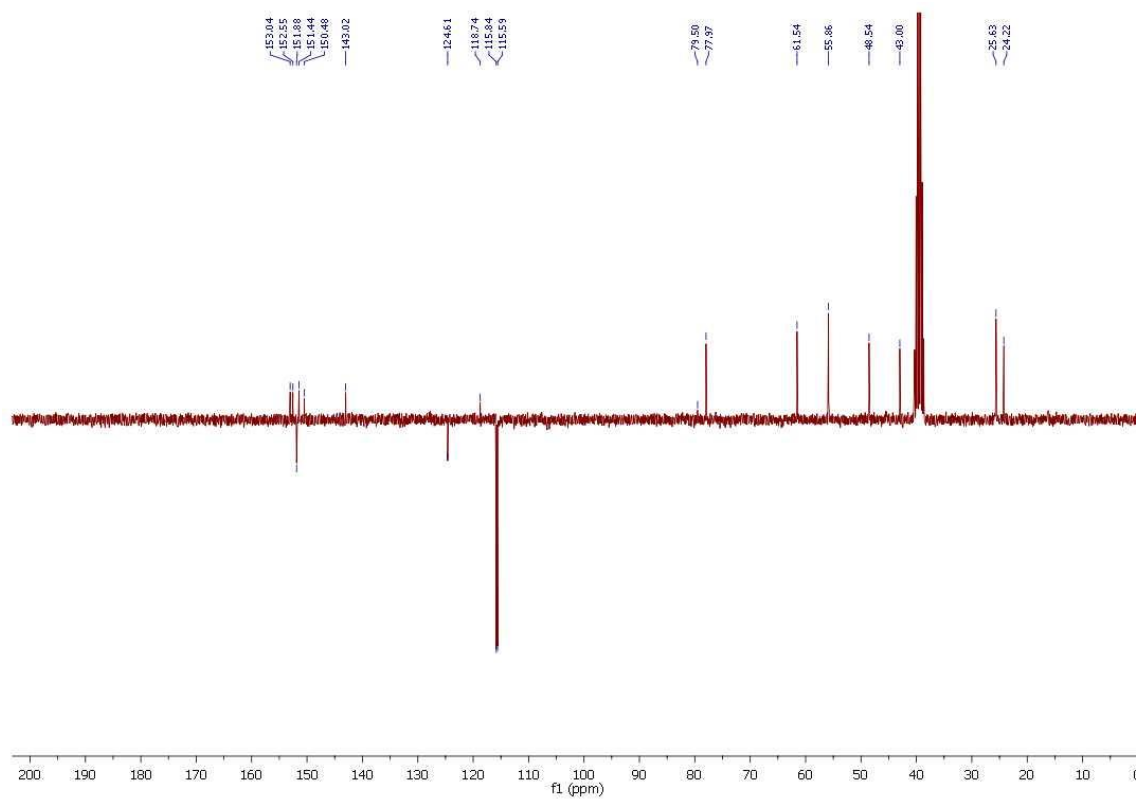

**Fig. S28** a)  $^1\text{H}$  NMR and b)  $^{13}\text{C}$  NMR of compd. **9f A-261-Mono**

a)

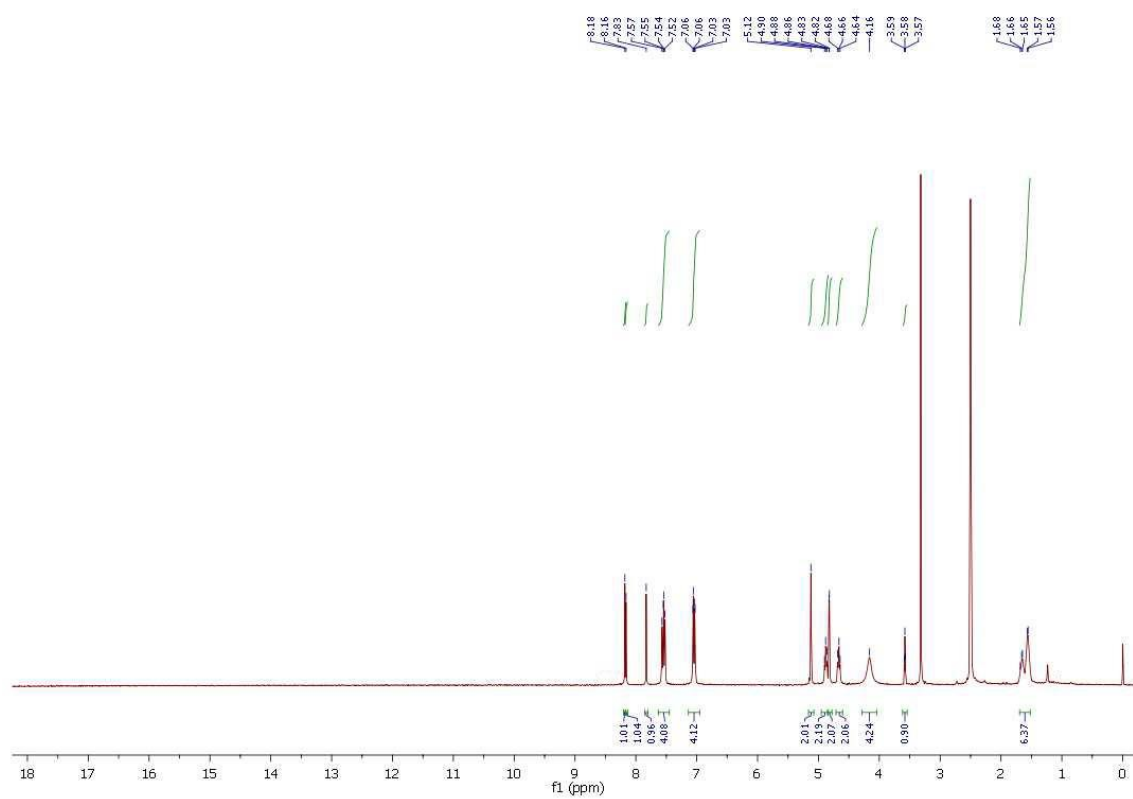

b)

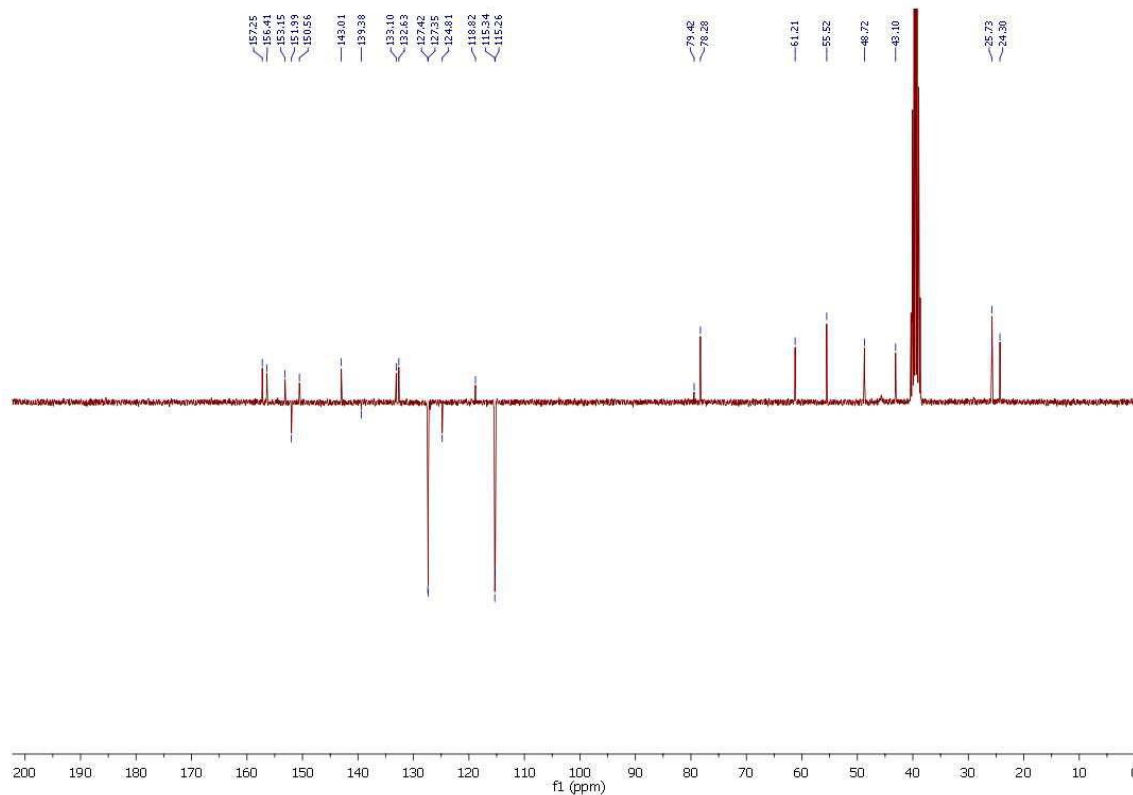

**Fig. S29** a)  $^1\text{H}$  NMR and b)  $^{13}\text{C}$  NMR of compd. **9g A-262-Mono**

a)

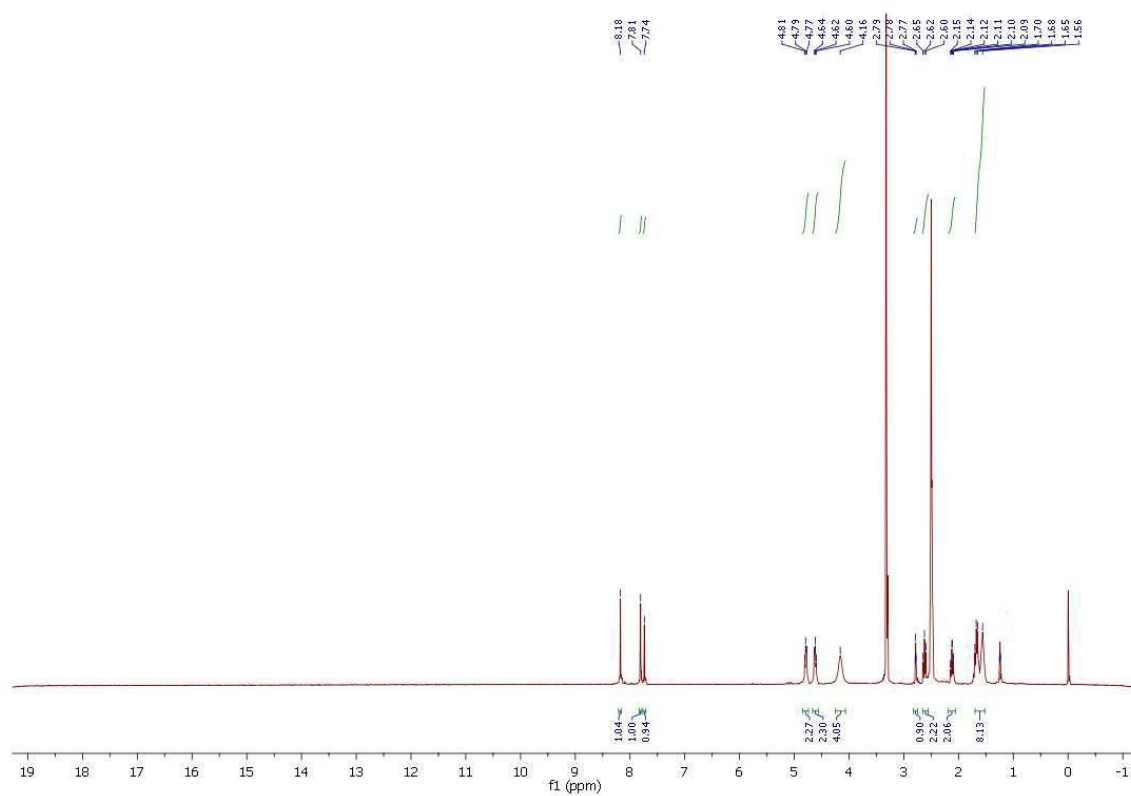

b)

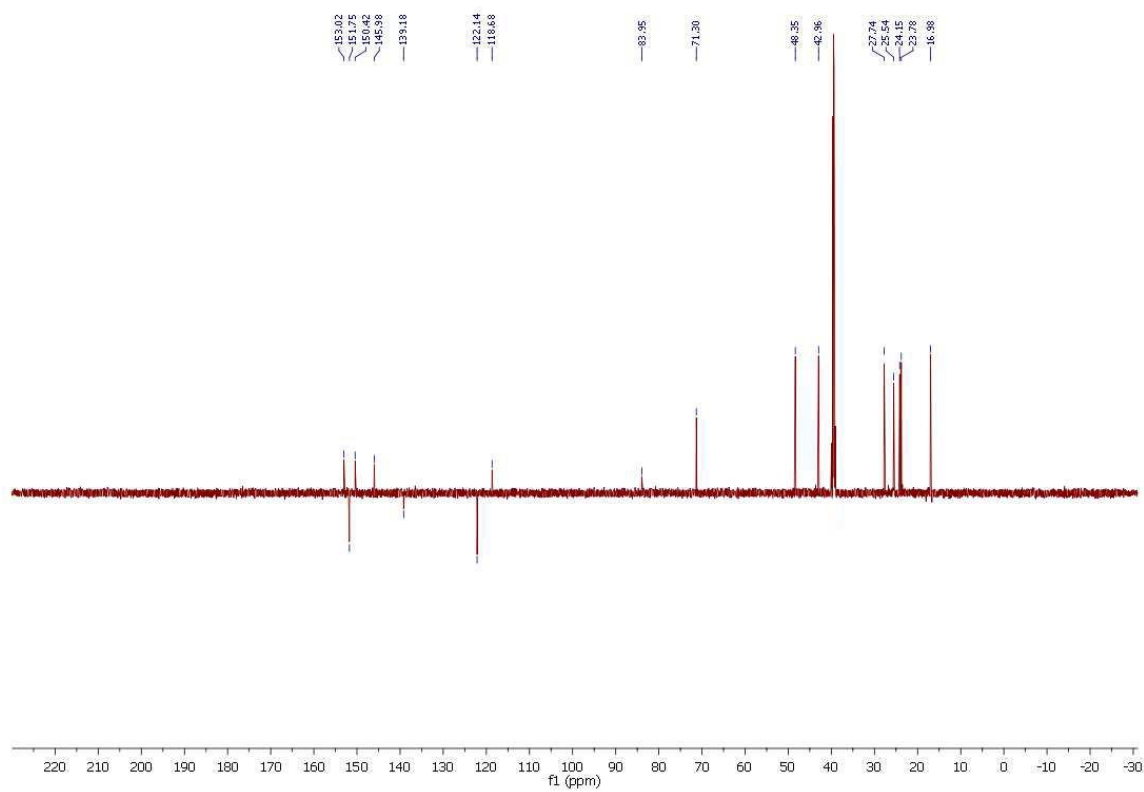

**Fig. S30** a)  $^1\text{H}$  NMR and b)  $^{13}\text{C}$  NMR of compd. **10a A-263**

a)

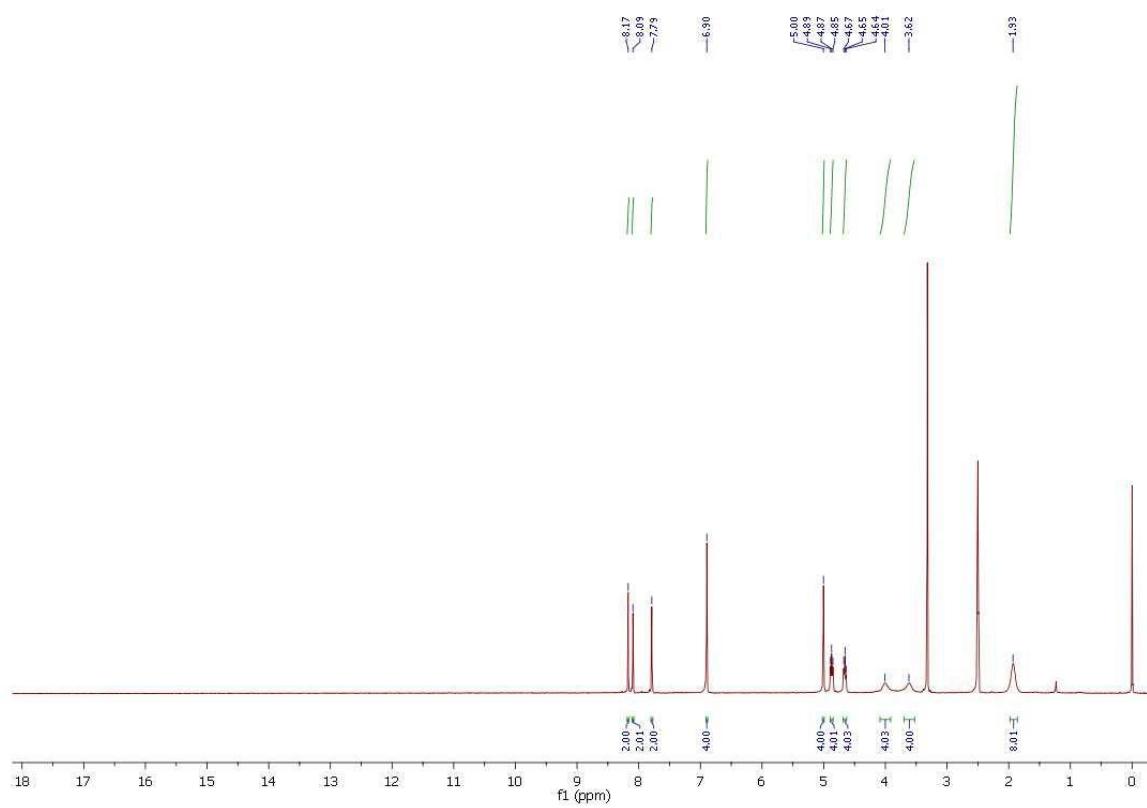

b)

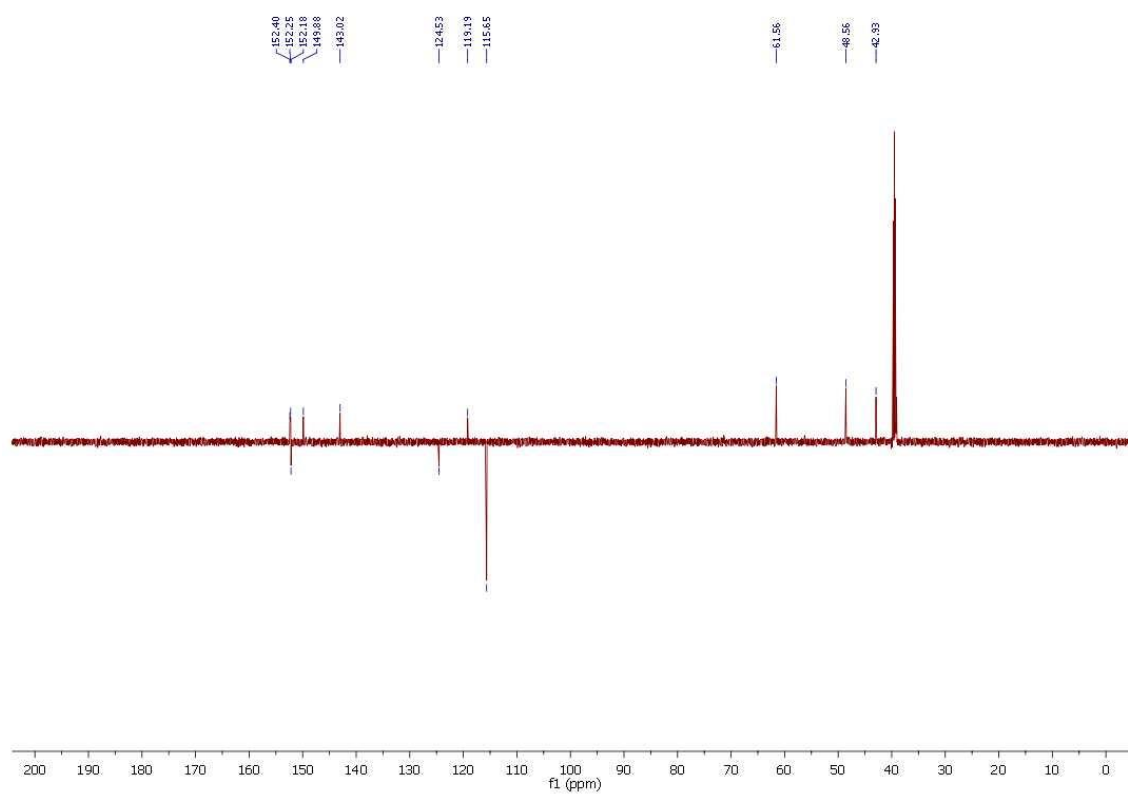

**Fig. S31** a)  $^1\text{H}$  NMR and b)  $^{13}\text{C}$  NMR of compd. **10b A-265**

a)

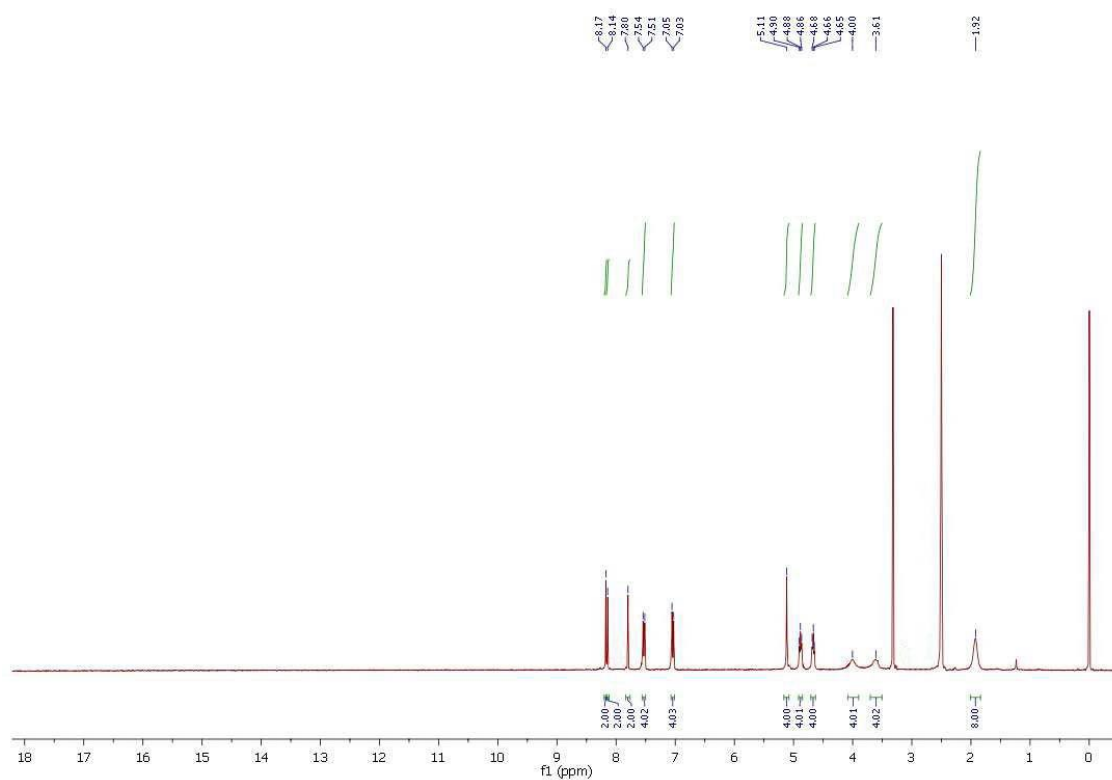

b)

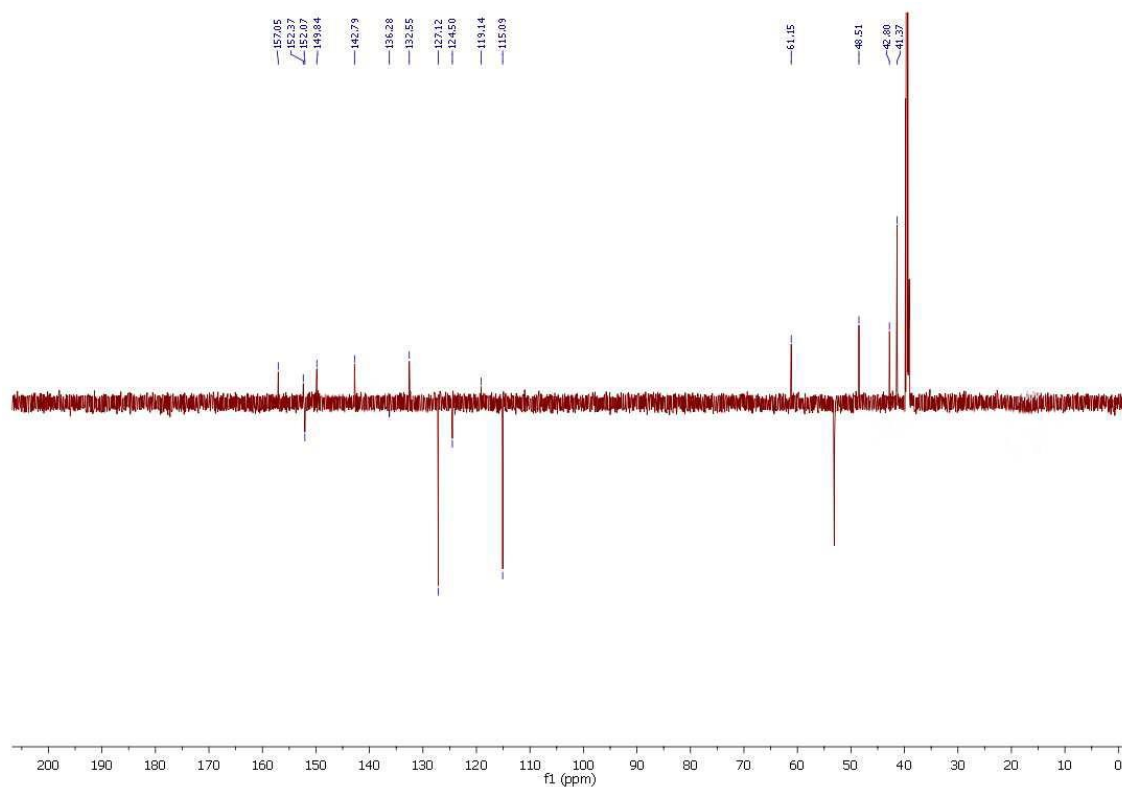



**Fig. S32** a)  $^1\text{H}$  NMR and b)  $^{13}\text{C}$  NMR of compd. **10c A-264**

a)

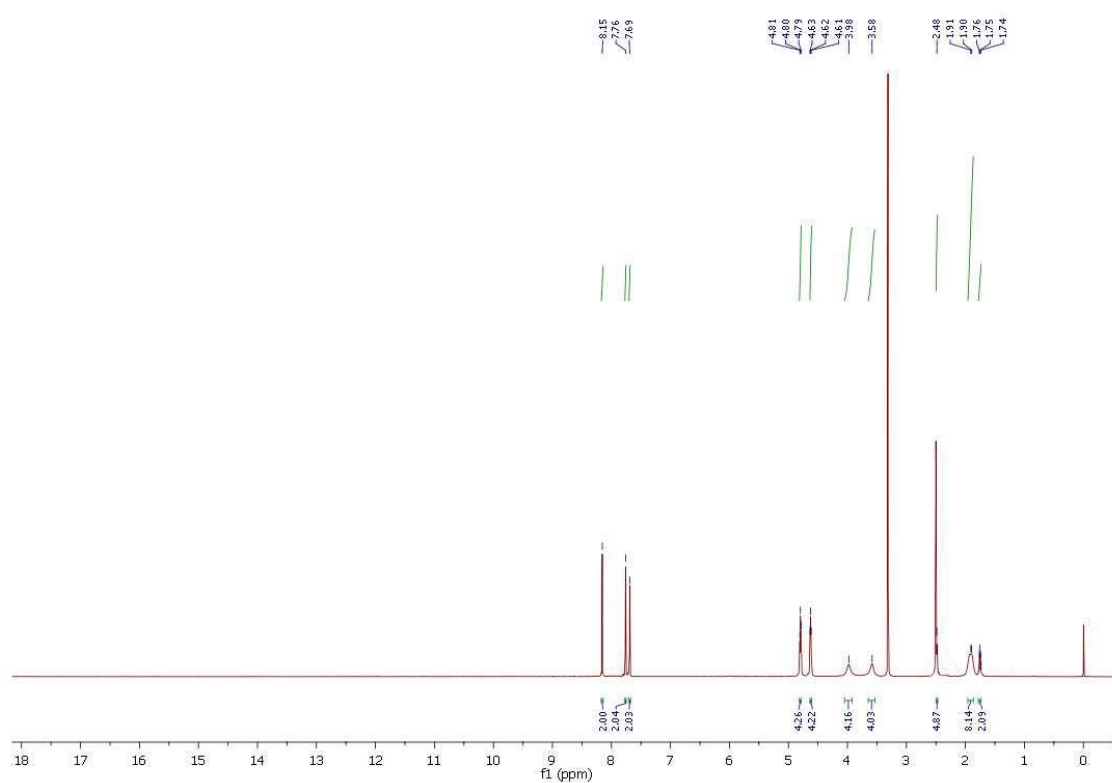

b)

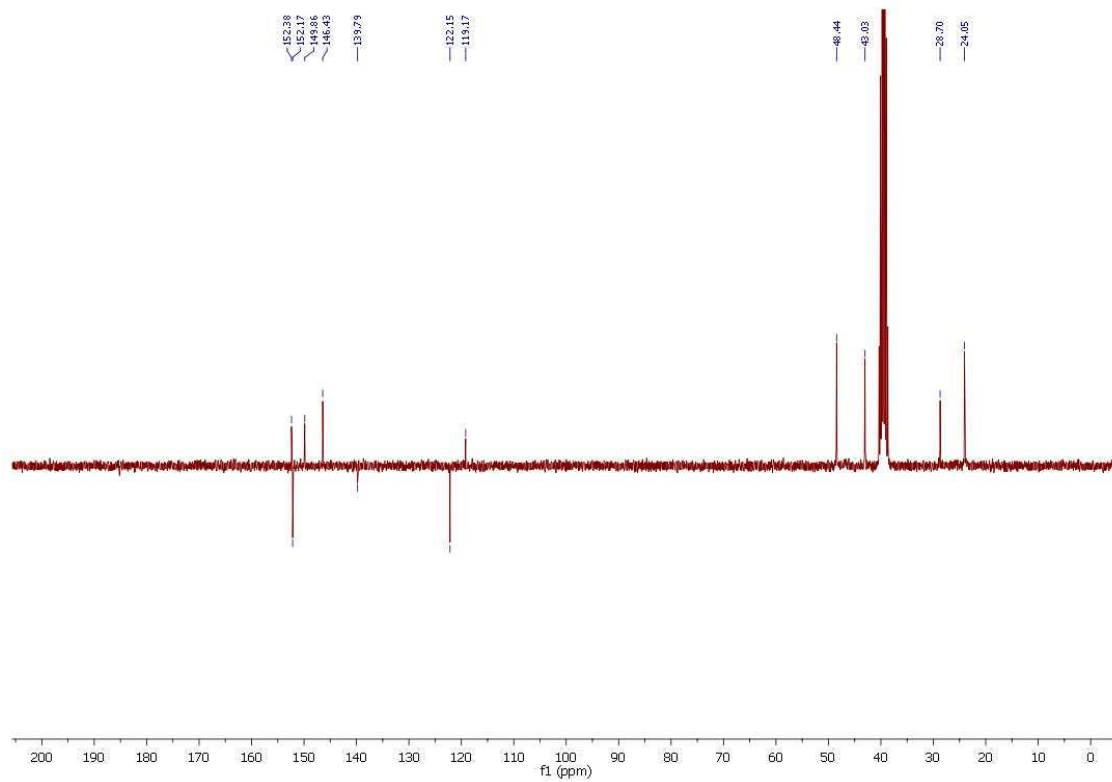

**Fig. S33** a)  $^1\text{H}$  NMR and b)  $^{13}\text{C}$  NMR of compd. **10d A-267**

a)

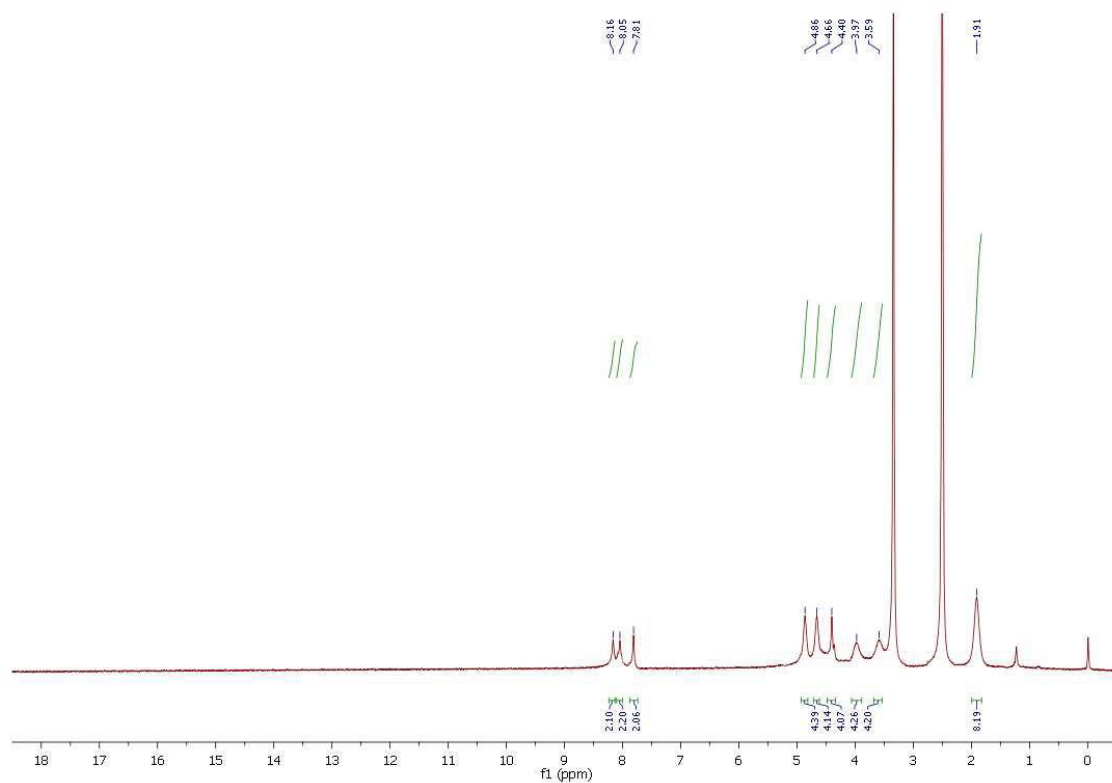

b)

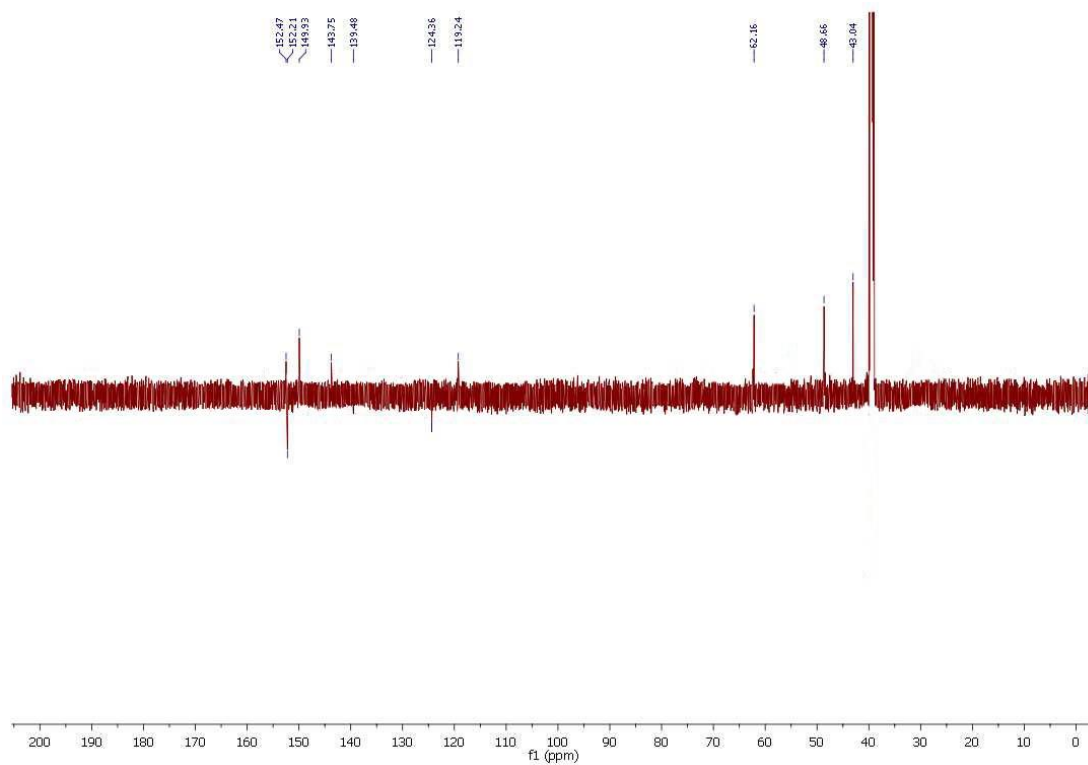

**Fig. S34** a)  $^1\text{H}$  NMR and b)  $^{13}\text{C}$  NMR of compd. **10f**

a)

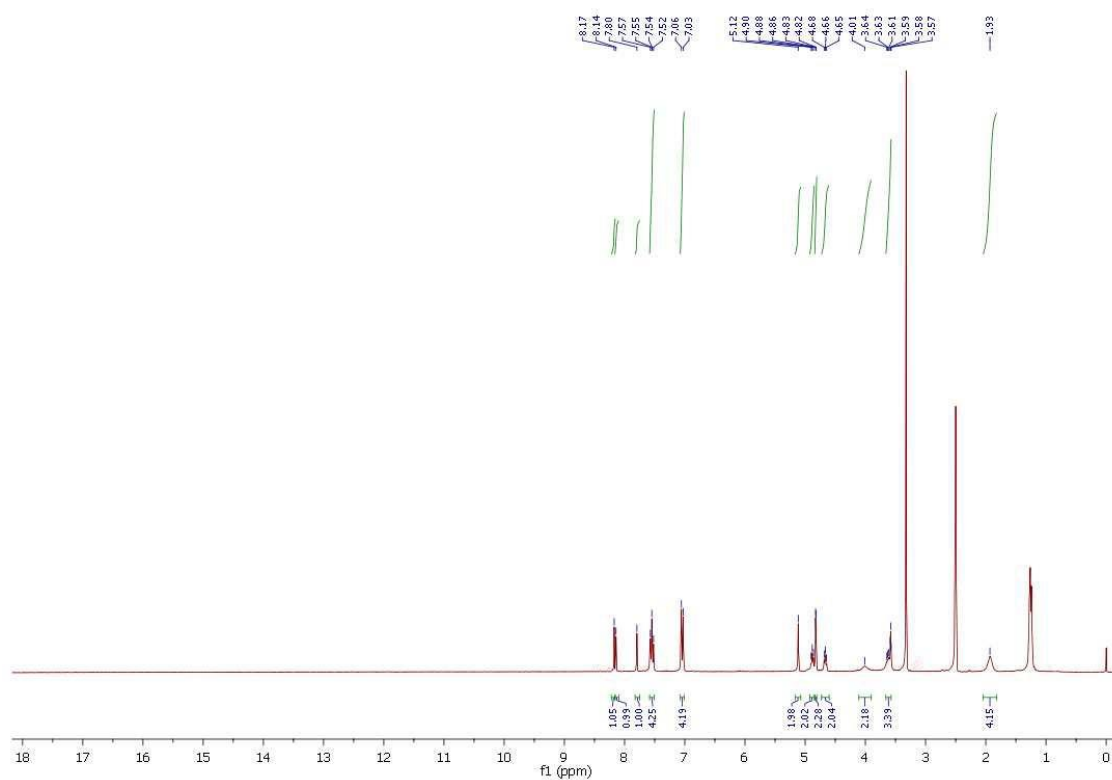

b)

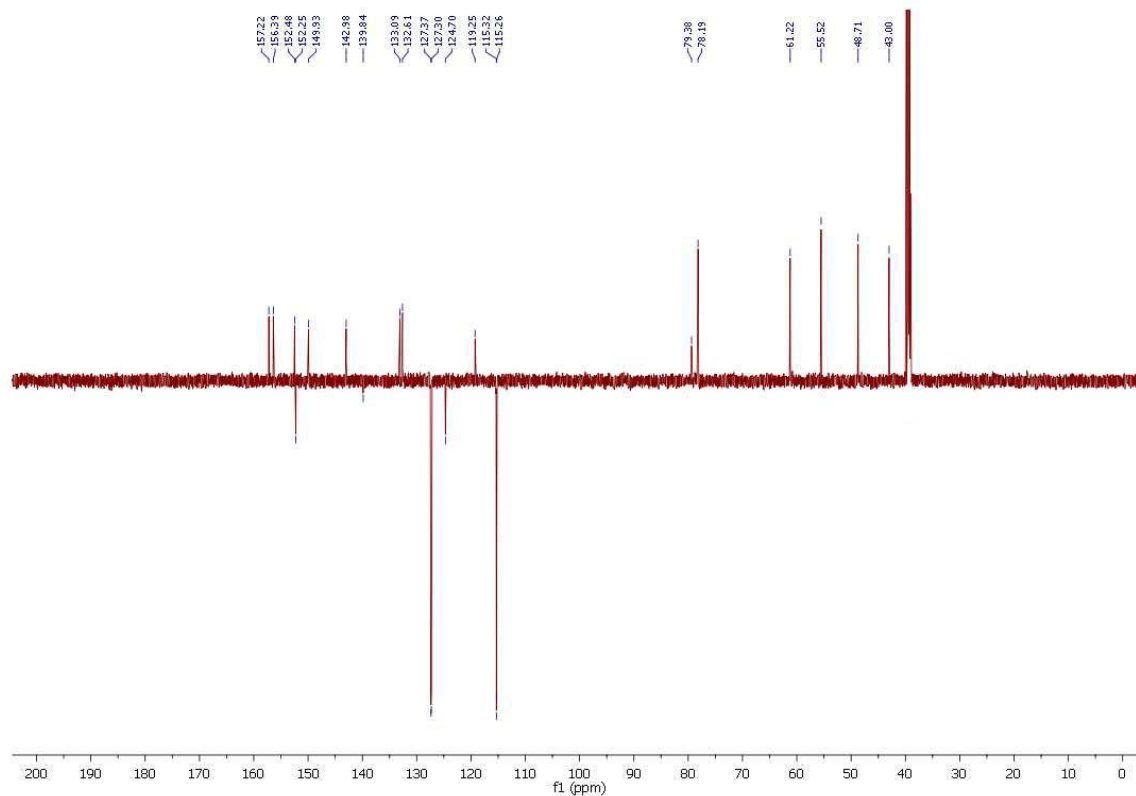

**Fig. S35** a)  $^1\text{H}$  NMR and b)  $^{13}\text{C}$  NMR of compd. **11a**

a)

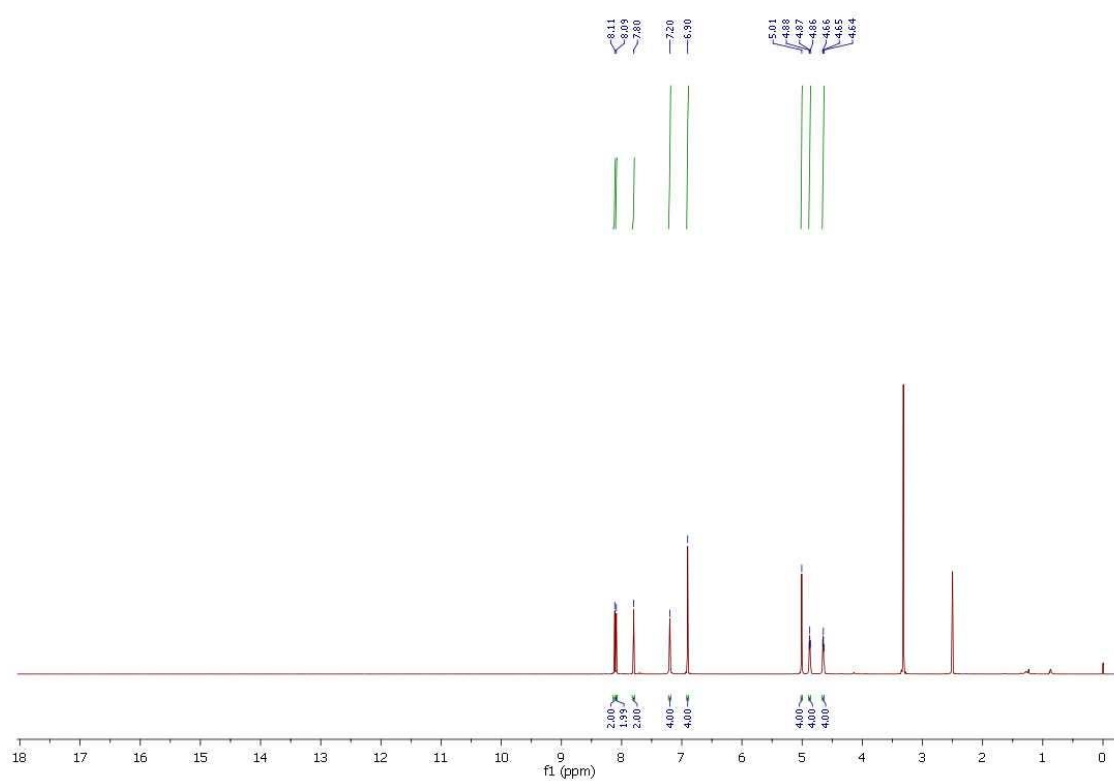

b)

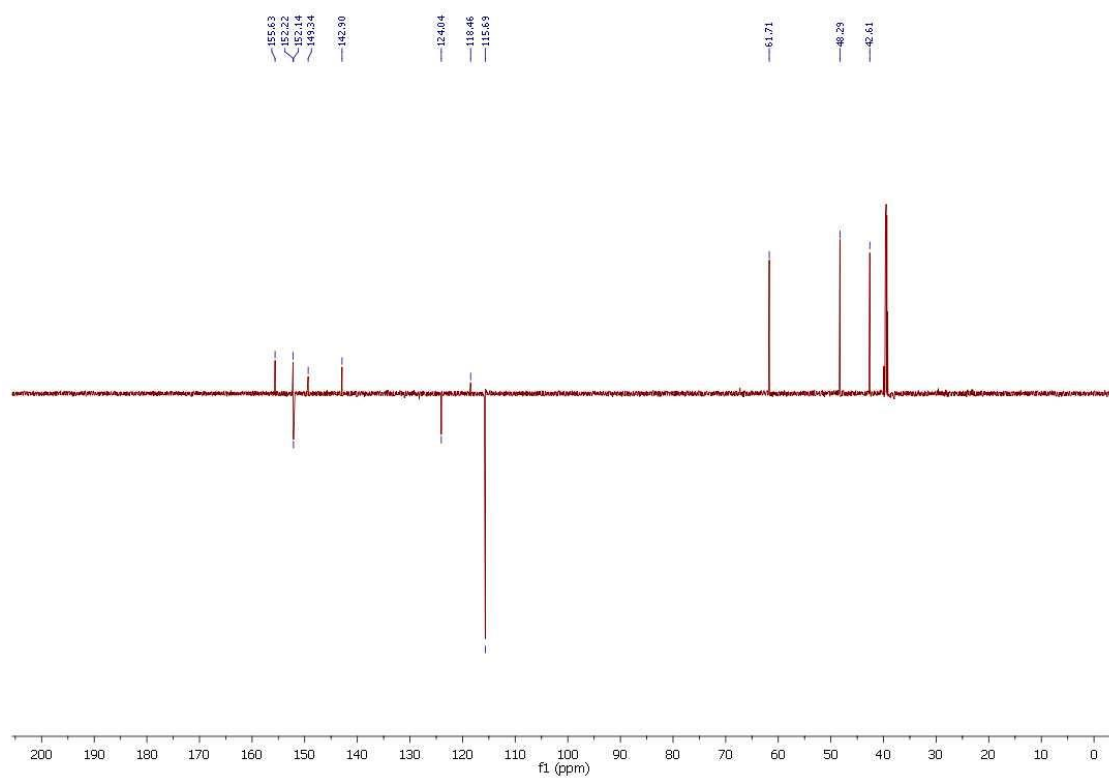

**Fig. S36** a)  $^1\text{H}$  NMR and b)  $^{13}\text{C}$  NMR of compd. **11d**

a)

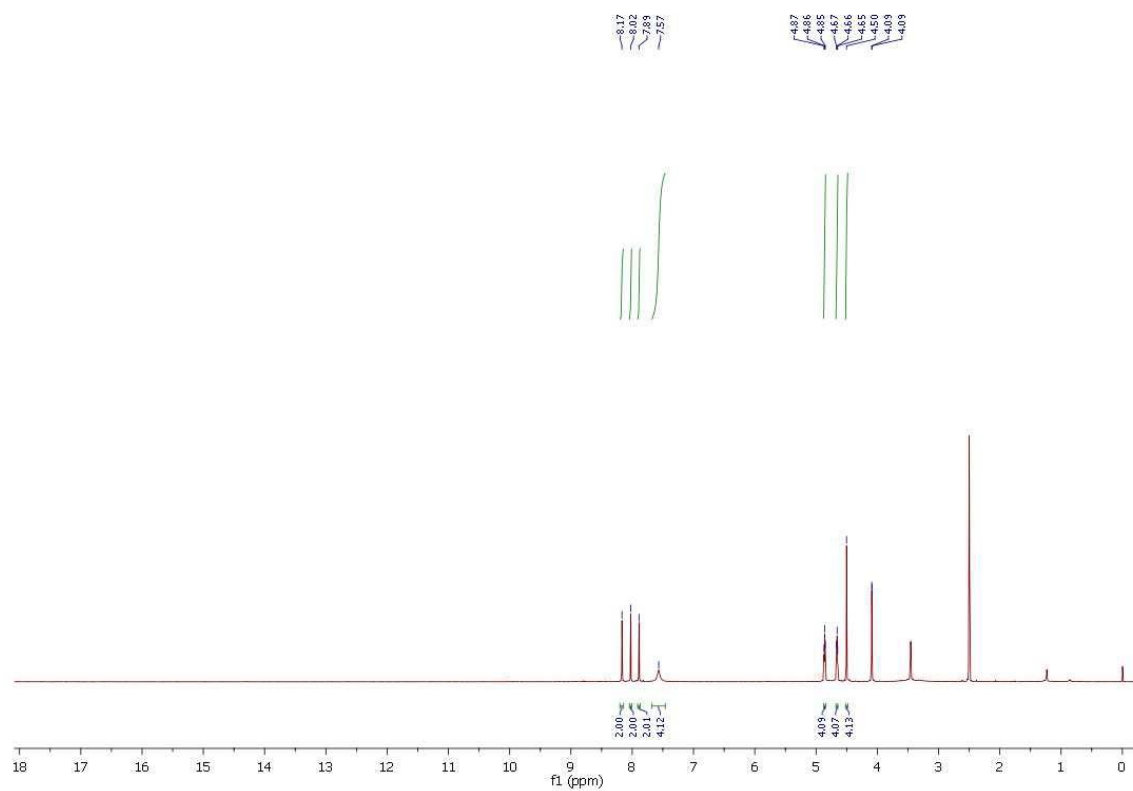

b)

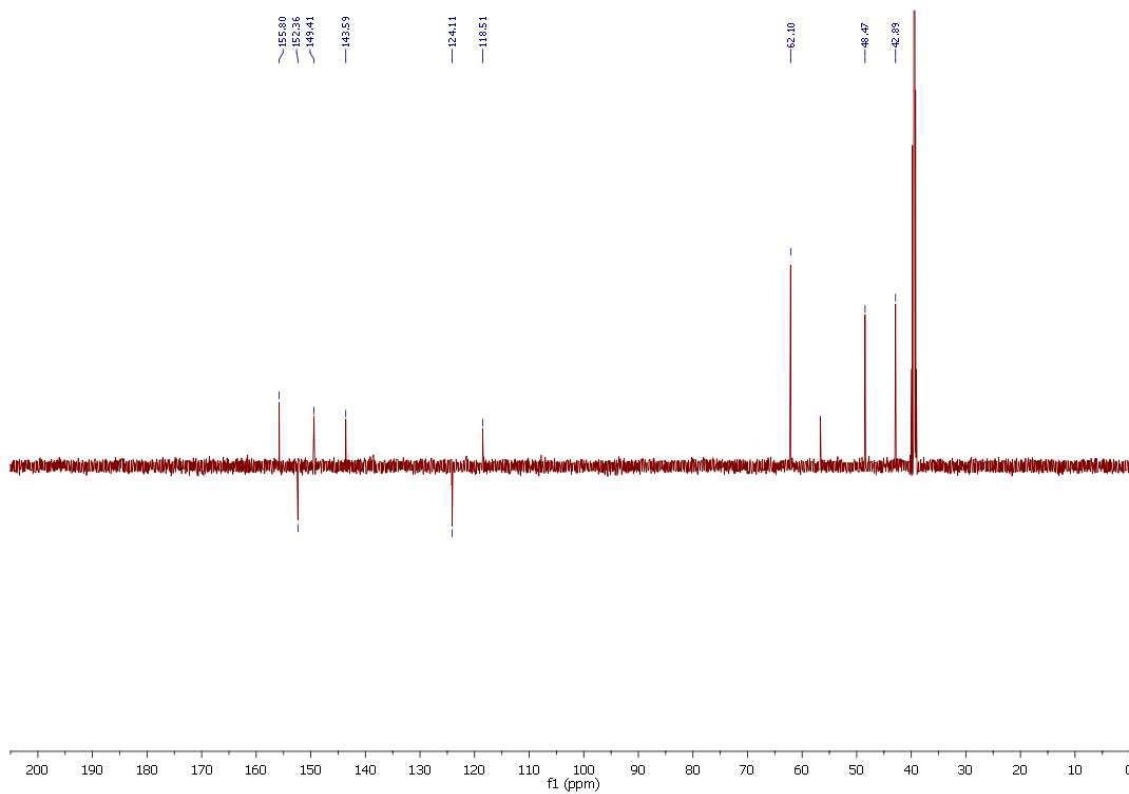

**Fig. S37** a)  $^1\text{H}$  NMR and b)  $^{13}\text{C}$  NMR of compd. **11e A-198-1**

a)

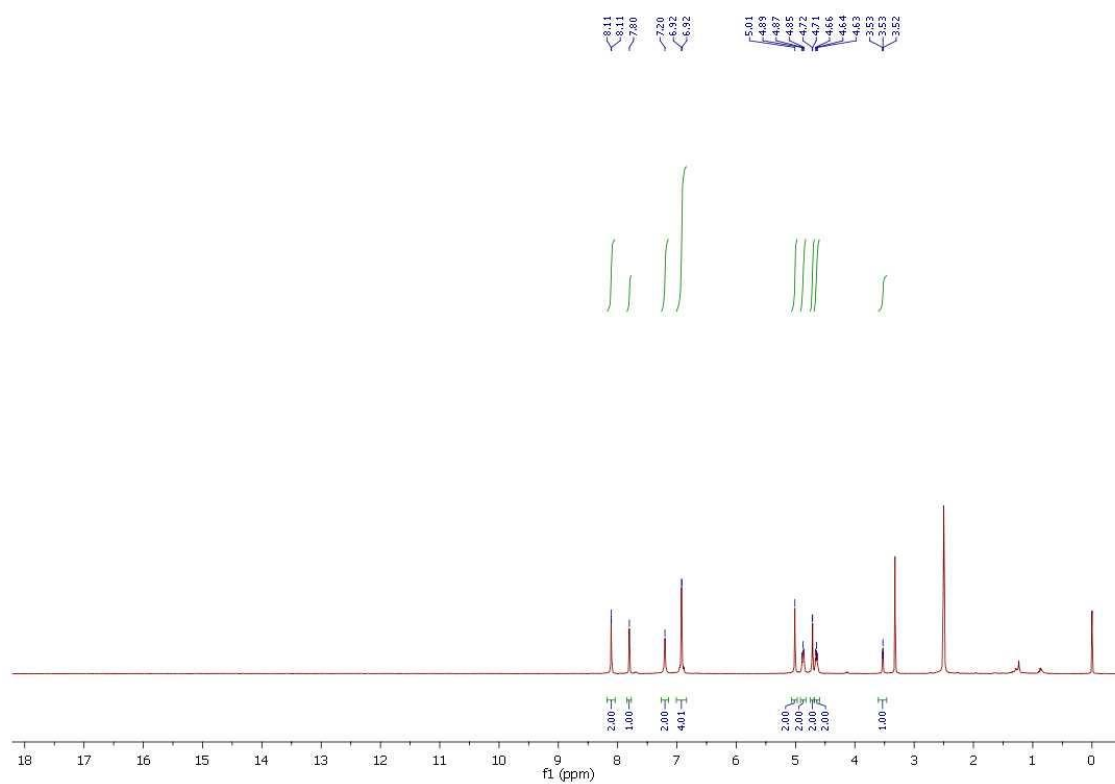

b)

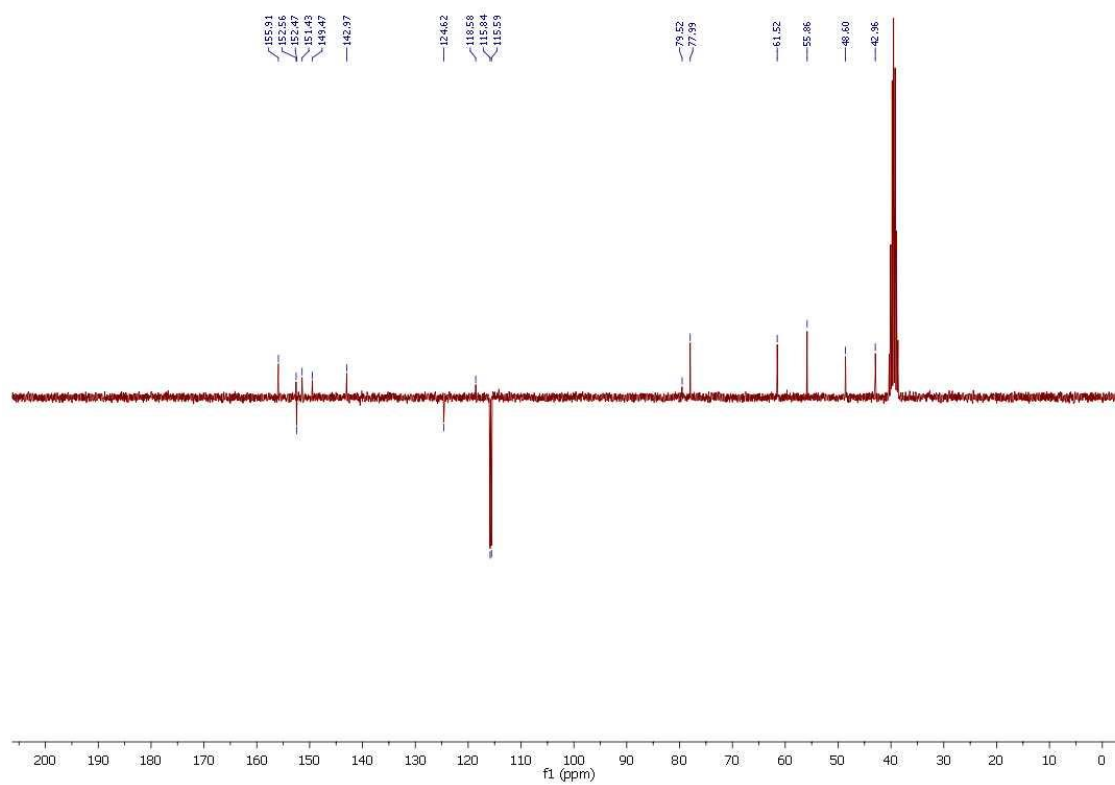

**Fig. S38** a)  $^1\text{H}$  NMR and b)  $^{13}\text{C}$  NMR of compd. **11g A-199**

a)

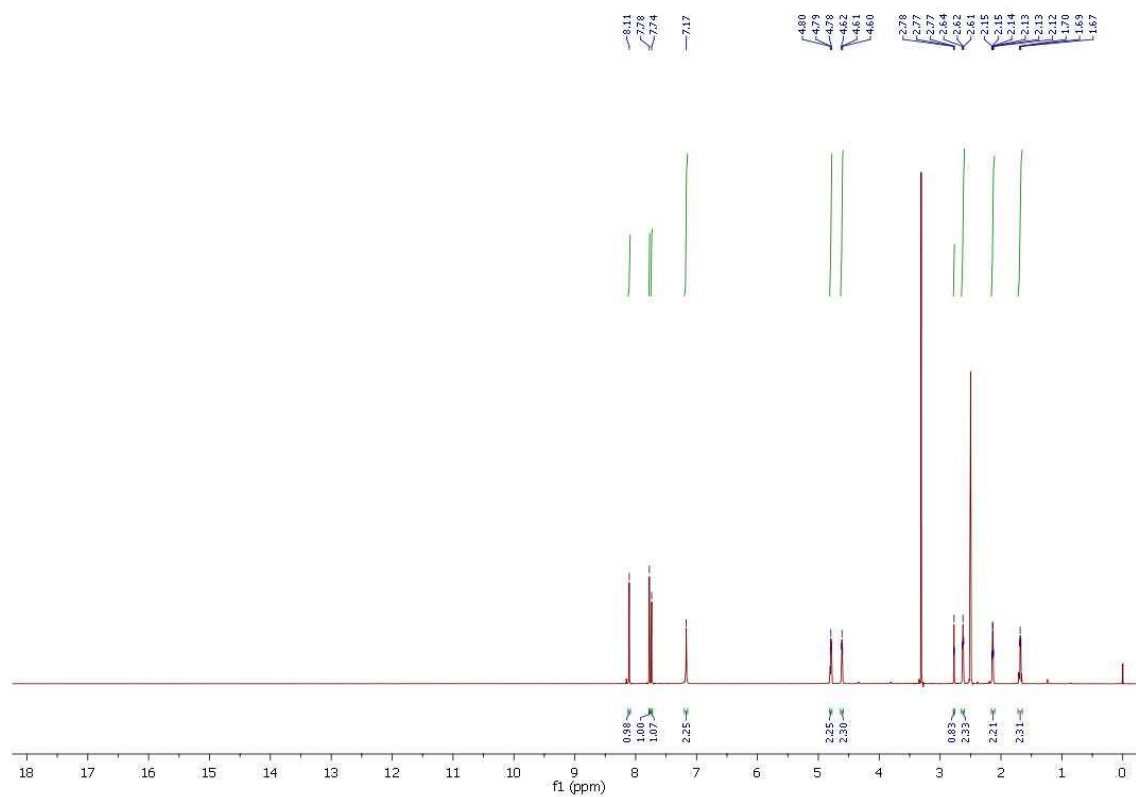

b)

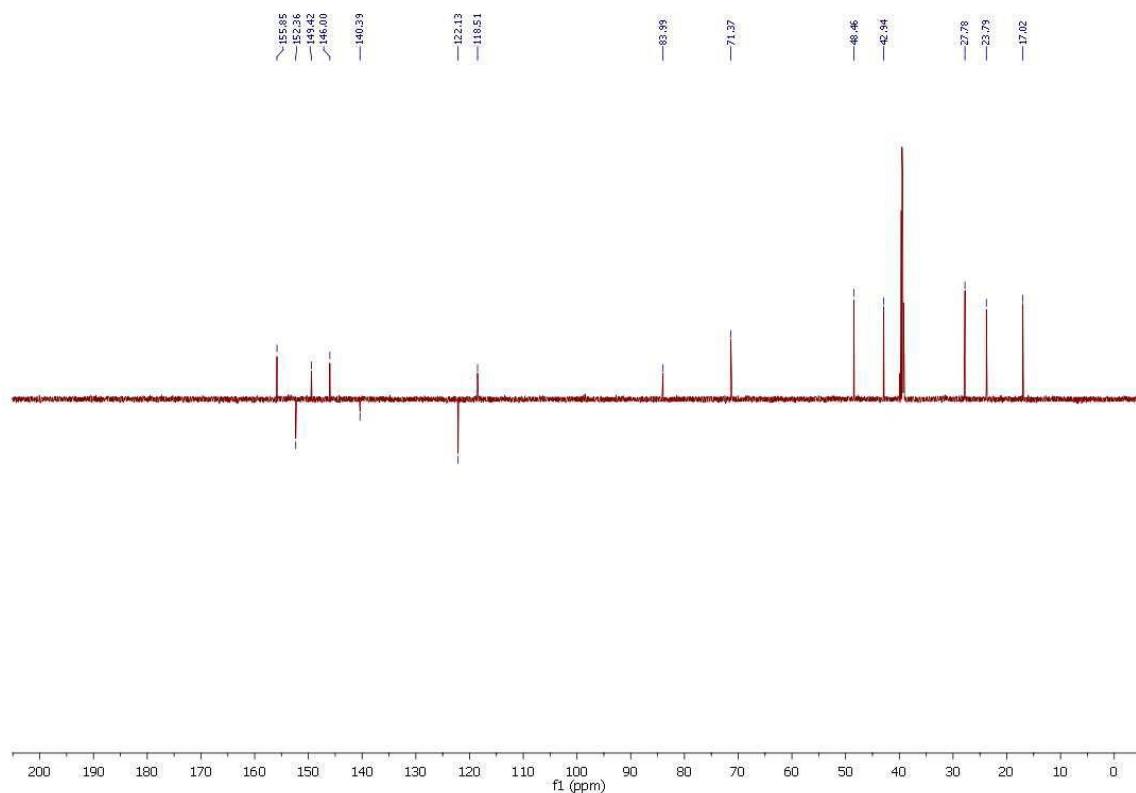

**Fig. S39** a)  $^1\text{H}$  NMR and b)  $^{13}\text{C}$  NMR of compd. **11h NS-74-1**

a)

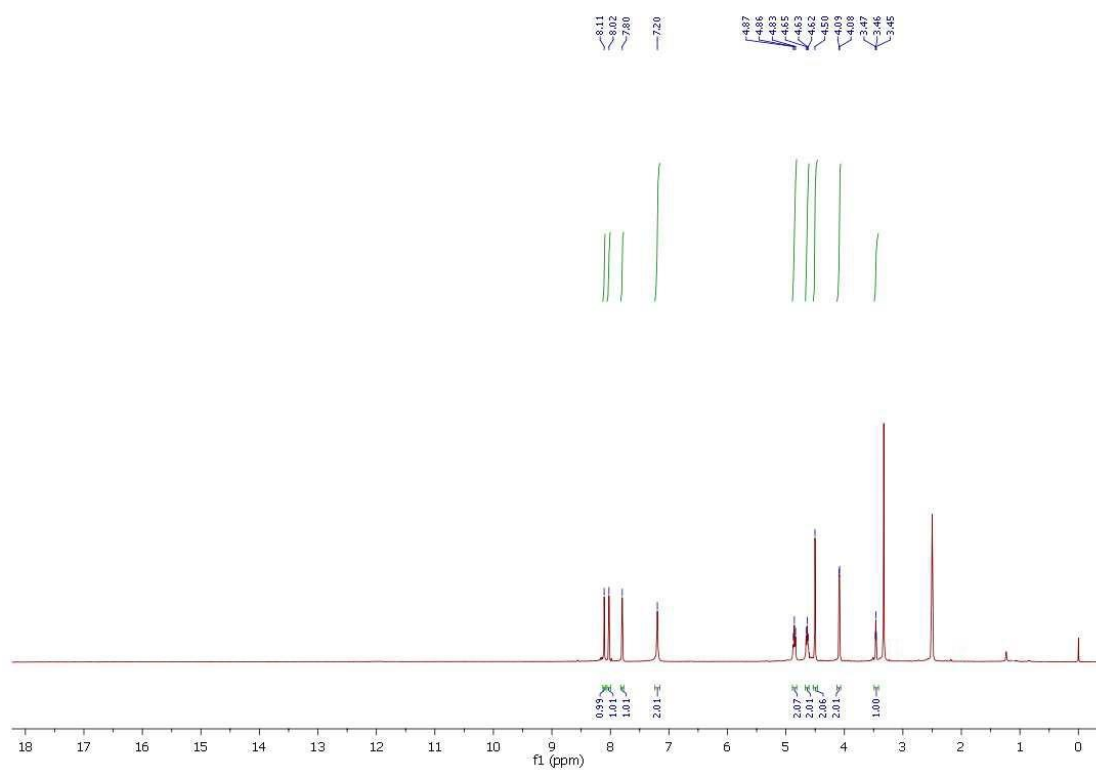

b)

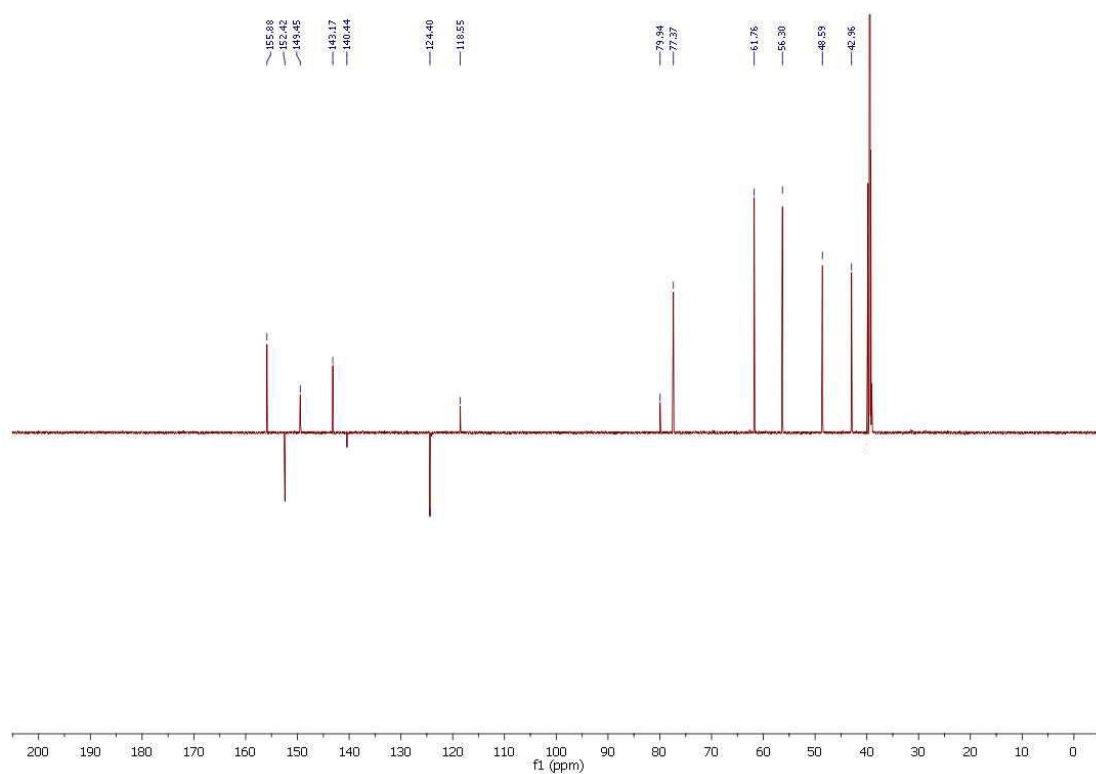



## 2. Computational analysis

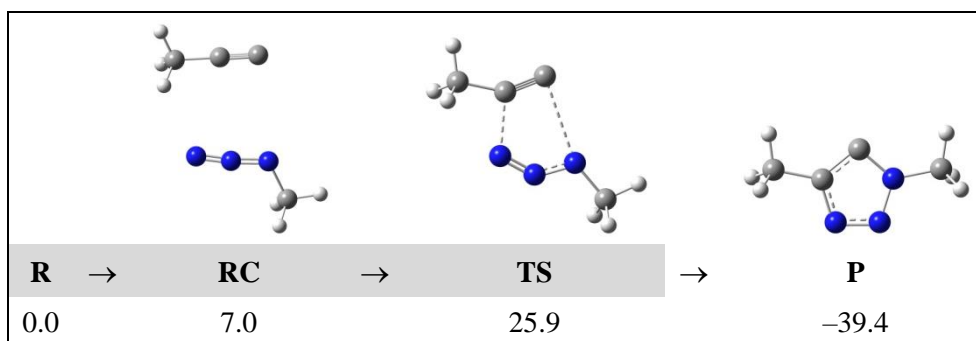

**Figure S40.** Uncatalyzed conversion of the deprotonated alkyne **m1**<sup>-</sup> and azide **m2** into triazole. Relative Gibbs free energies for isolated reactants (**R**), reactant complex (**RC**), transition state (**TS**) and isolated product (**P**) correspond to the DMF solution (in kcal mol<sup>-1</sup>). The reaction Gibbs free energy is  $\Delta G_R = -39.4$  kcal mol<sup>-1</sup>, while the kinetic barrier is  $\Delta G^\ddagger = 25.9$  kcal mol<sup>-1</sup> and corresponds to the rate-limiting process denoted in shading.

| Metal State            | Property                | <b>m1<sup>0</sup></b>                                                               | <b>m1<sup>-</sup></b>                                                                | <b>m2<sup>0</sup></b>                                                                 |
|------------------------|-------------------------|-------------------------------------------------------------------------------------|--------------------------------------------------------------------------------------|---------------------------------------------------------------------------------------|
| <b>Cu<sup>0</sup></b>  | Structure               | 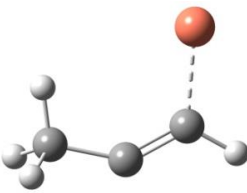   |    |    |
|                        | Cu–C/N bond             | 1.91 Å                                                                              | 1.94 Å                                                                               | 1.90 Å                                                                                |
|                        | Cu–C/N–C angle          | 121.6°                                                                              | 179.8°                                                                               | 123.6°                                                                                |
|                        | $\Delta G_{\text{INT}}$ | –11.0 kcal mol <sup>–1</sup>                                                        | –11.5 kcal mol <sup>–1</sup>                                                         | –20.5 kcal mol <sup>–1</sup>                                                          |
| <b>Cu<sup>+</sup></b>  | Structure               |    |    |    |
|                        | Cu–C/N bond             | 1.99 Å                                                                              | 1.83 Å                                                                               | 1.95 Å                                                                                |
|                        | Cu–C/N–C angle          | 76.7°                                                                               | 179.9°                                                                               | 123.0°                                                                                |
|                        | $\Delta G_{\text{INT}}$ | –11.9 kcal mol <sup>–1</sup>                                                        | –41.4 kcal mol <sup>–1</sup>                                                         | –5.6 kcal mol <sup>–1</sup>                                                           |
| <b>Cu<sup>2+</sup></b> | Structure               |  |  |  |
|                        | Cu–C/N bond             | 2.11 Å                                                                              | 1.85 Å                                                                               | 2.05 Å                                                                                |
|                        | Cu–C/N–C angle          | 99.9°                                                                               | 177.3°                                                                               | 118.0°                                                                                |
|                        | $\Delta G_{\text{INT}}$ | –13.0 kcal mol <sup>–1</sup>                                                        | –66.6 kcal mol <sup>–1</sup>                                                         | –13.0 kcal mol <sup>–1</sup>                                                          |

**Figure S41.** Structures and relevant geometric parameters for complexes among copper in various oxidation states and the considered neutral alkyne (**m1<sup>0</sup>**), deprotonated alkyne (**m1<sup>-</sup>**) and azide (**m2**), together with the calculated interaction Gibbs free energies ( $\Delta G_{\text{INT}}$ ). All values correspond to the DMF solution.

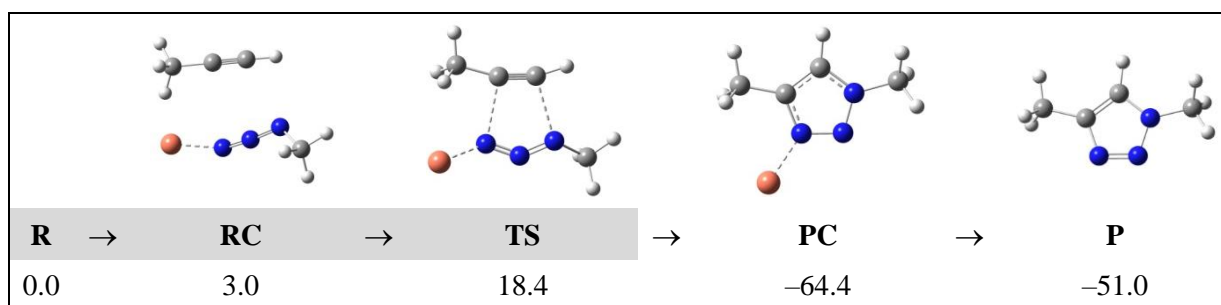

**Figure S42.** Cu(I)-catalyzed conversion of alkyne **m1**<sup>0</sup> and azide **m2** into triazole with Cu(I) bound to azide. Relative Gibbs free energies for isolated reactants (**R**), reactant complex (**RC**), transition state (**TS**), product complex (**PC**) and isolated product (**P**) correspond to the DMF solution (in kcal mol<sup>-1</sup>). The reaction Gibbs free energy is  $\Delta G_R = -51.0$  kcal mol<sup>-1</sup>, while the kinetic barrier is  $\Delta G^\ddagger = 18.4$  kcal mol<sup>-1</sup> and corresponds to the rate-limiting process denoted in shading.

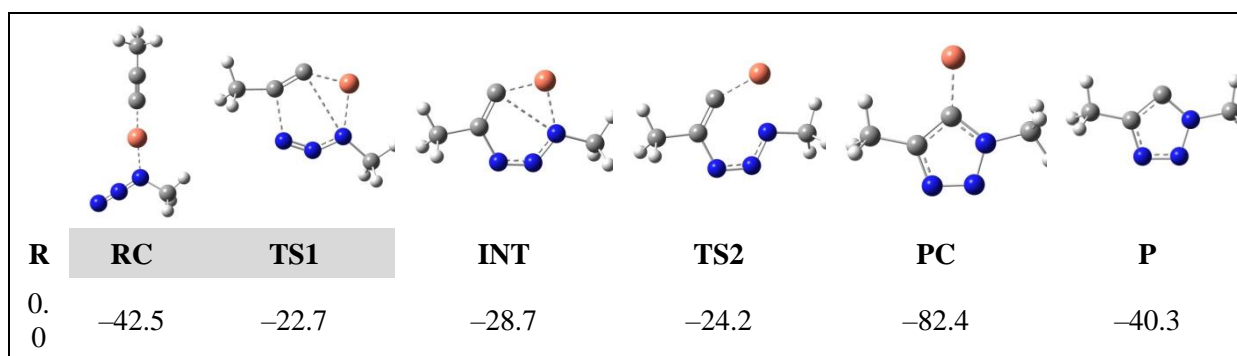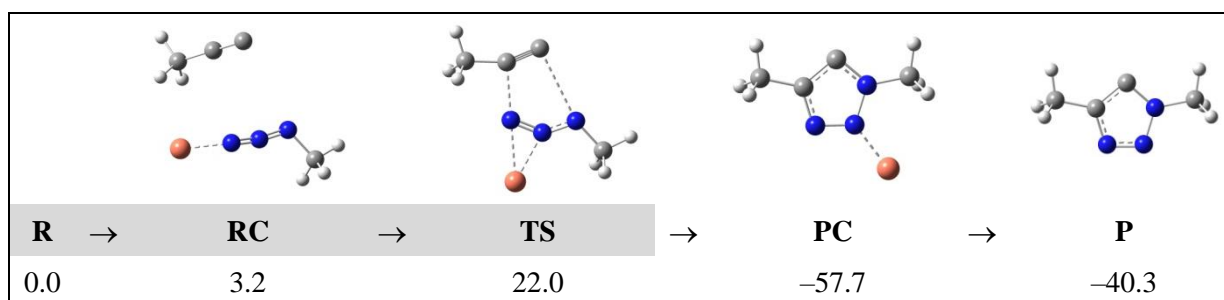

**Figure S43.** Cu(I)-catalyzed conversion of deprotonated anionic alkyne **m1**<sup>-</sup> and azide **m2** into triazole with Cu(I) bound to either alkyne (top) or azide (bottom). Relative Gibbs free energies for isolated reactants (**R**), reactant complex (**RC**), transition state (**TS**), intermediate (**INT**), product complex (**PC**) and isolated product (**P**) correspond to the DMF solution (in kcal mol<sup>-1</sup>). The reaction Gibbs free energy for both processes is  $\Delta G_R = -40.3$  kcal mol<sup>-1</sup>, while the kinetic barriers are  $\Delta G^\ddagger = 19.8$  kcal mol<sup>-1</sup> (top) and  $\Delta G^\ddagger = 22.0$  kcal mol<sup>-1</sup> (bottom), and corresponds to the rate-limiting processes denoted in shading.

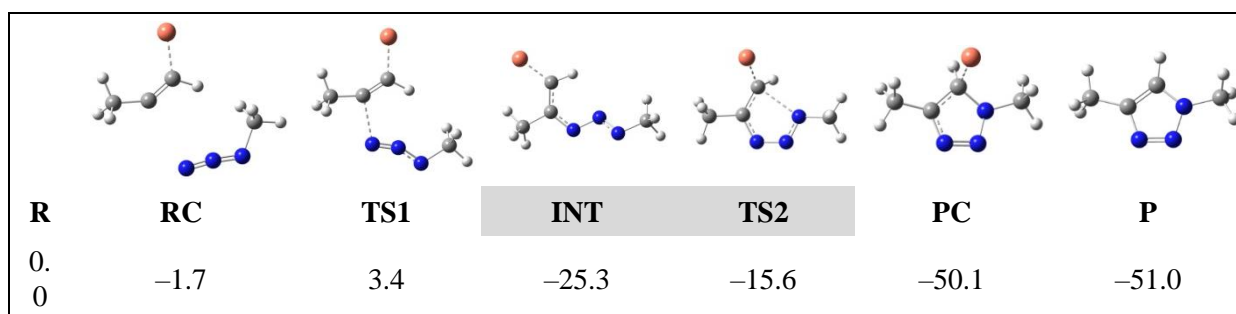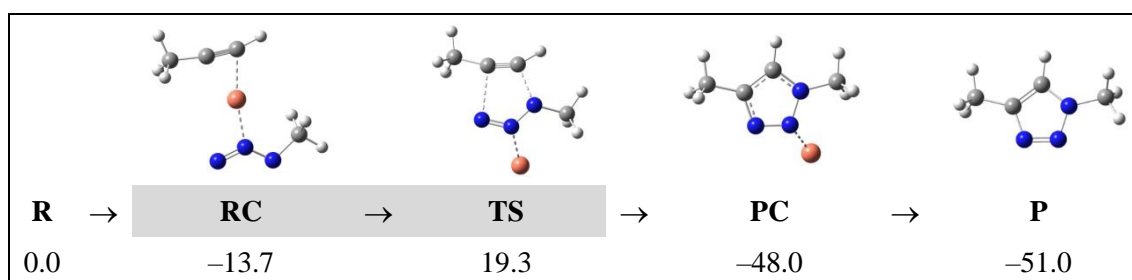

**Figure S44.** Cu(0)-catalyzed conversion of neutral alkyne **m1**<sup>0</sup> and azide **m2** into triazole with Cu(0) bound to either alkyne (top) or azide (bottom). Relative Gibbs free energies for isolated reactants (**R**), reactant complex (**RC**), transition state (**TS**), intermediate (**INT**), product complex (**PC**) and isolated product (**P**) correspond to the DMF solution (in kcal mol<sup>-1</sup>). The reaction Gibbs free energy for both processes is  $\Delta G_R = -51.0$  kcal mol<sup>-1</sup>, while the kinetic barriers are  $\Delta G^\ddagger = 9.7$  kcal mol<sup>-1</sup> (top) and  $\Delta G^\ddagger = 33.0$  kcal mol<sup>-1</sup> (bottom), and corresponds to the rate-limiting processes denoted in shading.

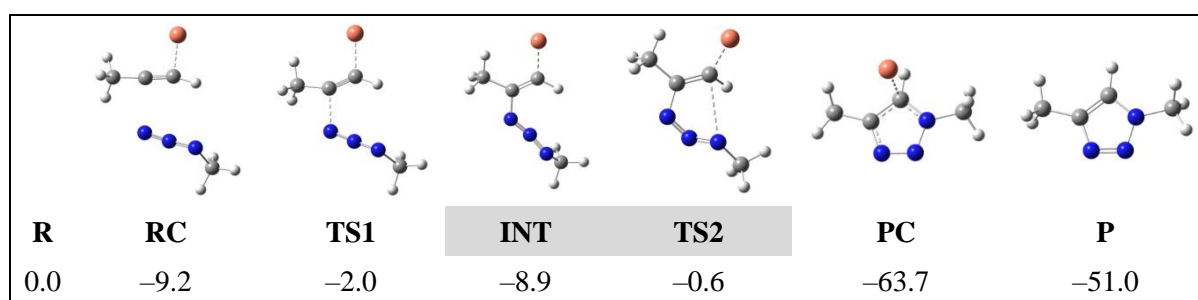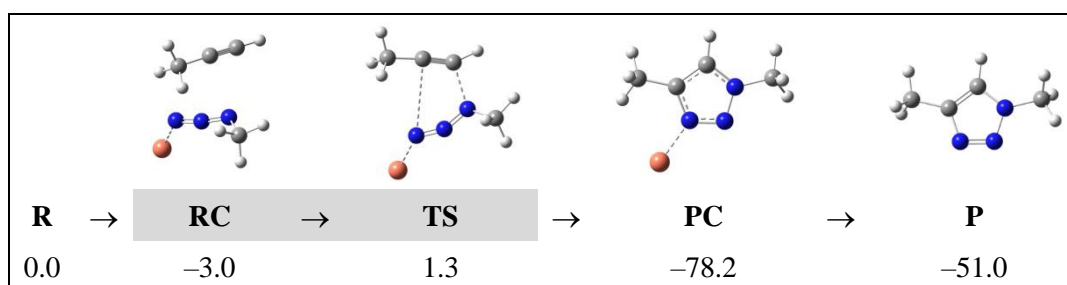

**Figure S45.** Cu(II)-catalyzed conversion of neutral alkyne **m1**<sup>0</sup> and azide **m2** into triazole with Cu(II) bound to either alkyne (top) or azide (bottom). Relative Gibbs free energies for isolated reactants (**R**), reactant complex (**RC**), transition state (**TS**), product complex (**PC**) and isolated product (**P**) correspond to the DMF solution (in kcal mol<sup>-1</sup>). The reaction Gibbs free energy for both processes is  $\Delta G_R = -51.0$  kcal mol<sup>-1</sup>, while the kinetic barriers are  $\Delta G^\ddagger = 8.3$  kcal mol<sup>-1</sup> (top) and  $\Delta G^\ddagger = 4.3$  kcal mol<sup>-1</sup> (bottom), and corresponds to the rate-limiting processes denoted in shading.

|                                                              |                                                                                   |                                                                                    |                                                                                     |
|--------------------------------------------------------------|-----------------------------------------------------------------------------------|------------------------------------------------------------------------------------|-------------------------------------------------------------------------------------|
| <b>Model system</b>                                          | 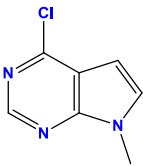 |  |  |
| <b>Most stable complex</b>                                   |  |  |  |
| <b>Cu(I)⋯N distance</b>                                      | 1.94 Å                                                                            | 1.92 Å                                                                             | 1.93 Å                                                                              |
| <b>Interaction energy <math>\Delta G_{\text{INT}}</math></b> | -8.8 kcal mol <sup>-1</sup>                                                       | -12.0 kcal mol <sup>-1</sup>                                                       | -12.8 kcal mol <sup>-1</sup>                                                        |

|                                                              |                                                                                     |                                                                                      |                                                                                       |
|--------------------------------------------------------------|-------------------------------------------------------------------------------------|--------------------------------------------------------------------------------------|---------------------------------------------------------------------------------------|
| <b>Model system</b>                                          | 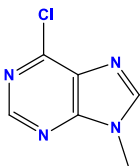 |  |  |
| <b>Most stable complex</b>                                   |  |  |  |
| <b>Cu(I)⋯N distance</b>                                      | 1.94 Å                                                                              | 1.92 Å                                                                               | 1.91 Å                                                                                |
| <b>Interaction energy <math>\Delta G_{\text{INT}}</math></b> | -8.8 kcal mol <sup>-1</sup>                                                         | -12.1 kcal mol <sup>-1</sup>                                                         | -12.3 kcal mol <sup>-1</sup>                                                          |

**Figure S46.** Interaction Gibbs free energies between several model systems and Cu(I) ions together with relevant Cu(I)⋯N distances.
